# Supplementary material for: High-flow nasal oxygen therapy alone or with non-invasive ventilation in immunocompromised patients admitted to ICU for acute hypoxemic respiratory failure: the randomised multicentre controlled FLORALI-IM protocol
Source: PubMed Central journal article supplement — BMJ Open. 2019 Aug 10;9(8):e029798. doi: 10.1136/bmjopen-2019-029798 (PMC6701687; doi:10.1136/bmjopen-2019-029798), 2019-08-10
Supplement: bmjopen-2019-029798.draft_revisions.pdf [file bmjopen-2019-029798.draft_revisions.pdf]

# BMJ Open

BMJ Open is committed to open peer review. As part of this commitment we make the peer review history of every article we publish publicly available.

When an article is published we post the peer reviewers' comments and the authors' responses online. We also post the versions of the paper that were used during peer review. These are the versions that the peer review comments apply to.

The versions of the paper that follow are the versions that were submitted during the peer review process. They are not the versions of record or the final published versions. They should not be cited or distributed as the published version of this manuscript.

BMJ Open is an open access journal and the full, final, typeset and author-corrected version of record of the manuscript is available on our site with no access controls, subscription charges or pay-per-view fees (<http://bmjopen.bmj.com>).

If you have any questions on BMJ Open's open peer review process please email [info.bmjopen@bmj.com](mailto:info.bmjopen@bmj.com)

# BMJ Open

## High-flow nasal oxygen therapy alone or with noninvasive ventilation in immunocompromised patients admitted to ICU for acute hypoxemic respiratory failure: the randomised multicentre controlled FLORALI-IM protocol

|                               |                                                                                                                                                                                                                                                                                                                                                                                                                                                                                                                                                                                                                                                                                                                                                                                                                                                                                                                                                                                                                                                                                                                                                                                                                                                                                                                                                                                                                                                                                                                                                                                                                                                                                                                                                                                                                                                                                                                                                                                                                                                                                                                                                                                                                                                                                                                                                  |
|-------------------------------|--------------------------------------------------------------------------------------------------------------------------------------------------------------------------------------------------------------------------------------------------------------------------------------------------------------------------------------------------------------------------------------------------------------------------------------------------------------------------------------------------------------------------------------------------------------------------------------------------------------------------------------------------------------------------------------------------------------------------------------------------------------------------------------------------------------------------------------------------------------------------------------------------------------------------------------------------------------------------------------------------------------------------------------------------------------------------------------------------------------------------------------------------------------------------------------------------------------------------------------------------------------------------------------------------------------------------------------------------------------------------------------------------------------------------------------------------------------------------------------------------------------------------------------------------------------------------------------------------------------------------------------------------------------------------------------------------------------------------------------------------------------------------------------------------------------------------------------------------------------------------------------------------------------------------------------------------------------------------------------------------------------------------------------------------------------------------------------------------------------------------------------------------------------------------------------------------------------------------------------------------------------------------------------------------------------------------------------------------|
| Journal:                      | <i>BMJ Open</i>                                                                                                                                                                                                                                                                                                                                                                                                                                                                                                                                                                                                                                                                                                                                                                                                                                                                                                                                                                                                                                                                                                                                                                                                                                                                                                                                                                                                                                                                                                                                                                                                                                                                                                                                                                                                                                                                                                                                                                                                                                                                                                                                                                                                                                                                                                                                  |
| Manuscript ID                 | bmjopen-2019-029798                                                                                                                                                                                                                                                                                                                                                                                                                                                                                                                                                                                                                                                                                                                                                                                                                                                                                                                                                                                                                                                                                                                                                                                                                                                                                                                                                                                                                                                                                                                                                                                                                                                                                                                                                                                                                                                                                                                                                                                                                                                                                                                                                                                                                                                                                                                              |
| Article Type:                 | Protocol                                                                                                                                                                                                                                                                                                                                                                                                                                                                                                                                                                                                                                                                                                                                                                                                                                                                                                                                                                                                                                                                                                                                                                                                                                                                                                                                                                                                                                                                                                                                                                                                                                                                                                                                                                                                                                                                                                                                                                                                                                                                                                                                                                                                                                                                                                                                         |
| Date Submitted by the Author: | 14-Feb-2019                                                                                                                                                                                                                                                                                                                                                                                                                                                                                                                                                                                                                                                                                                                                                                                                                                                                                                                                                                                                                                                                                                                                                                                                                                                                                                                                                                                                                                                                                                                                                                                                                                                                                                                                                                                                                                                                                                                                                                                                                                                                                                                                                                                                                                                                                                                                      |
| Complete List of Authors:     | <p>Coudroy, Rémi; CHU de Poitiers, Médecine Intensive et Réanimation ; INSERM CIC 1402, groupe ALIVE, Université de Poitiers<br/> Frat, Jean-Pierre; CHU de Poitiers, Médecine Intensive et Réanimation ; INSERM CIC 1402, groupe ALIVE, Université de Poitiers<br/> Ehrmann, Stephan; CHU de Tours, Médecine Intensive Réanimation; CIC 1415, CRICS-TriggerSEP, Centre d'étude des pathologies respiratoires, INSERM U1100, Université de Tours<br/> Pène, Frédéric; Hôpital Cochin, Médecine intensive &amp; Réanimation; Université Paris Descartes<br/> Terzi, Nicolas ; CHU Grenoble Alpes, Médecine Intensive Réanimation; INSERM, Université Grenoble-Alpes, U1042, HP2<br/> Decavèle, Maxens; Groupe Hospitalier Pitié-Salpêtrière Charles Foix, Service de Pneumologie, Médecine Intensive et Réanimation, Département R3S, AP-HP ; INSERM, UMRS1158 Neurophysiologie Respiratoire Expérimentale et Clinique, Sorbonne Université<br/> Prat, Gwenaël; CHU de Brest, Médecine Intensive et Réanimation<br/> Garret, Charlotte; CHU de Nantes, Médecine Intensive Réanimation<br/> Contou, Damien; Centre Hospitalier Victor Dupouy, Service de Réanimation Polyvalente<br/> Bourenne, Jeremy; CHU La Timone 2, Médecine Intensive Réanimation, Réanimation des Urgences, Aix-Marseille Université,<br/> Gacouin, Arnaud; CHU de Rennes, Hôpital Ponchaillou, Service des Maladies Infectieuses et Réanimation Médicale<br/> Girault, C; Hôpital Charles Nicolle, CHU de Rouen, Service de Réanimation Médicale; Normandie Univ, Unirouen, UPRES EA-3830<br/> Dellamonica, Jean ; CHU de Nice, Médecine Intensive Réanimation<br/> Malacrino, Dominique ; Centre hospitalier de Béthune, Service de Réanimation<br/> Labro, Guylaine; Hôpital Jean Minjoz, Medical Intensive Care Unit; Research Center EA3920, University of Franche-Comté<br/> Quenot, Jean-Pierre; CHU Dijon, Service de Médecine Intensive-Réanimation; INSERM U1231, Equipe Lipness, Université Bourgogne-Franche-Comté; UMR1231 Lipides, Nutrition, Cancer, équipe Lipness, LipSTIC LabEx, Fondation de coopération scientifique Bourgogne-Franche-Comté; INSERM, CIC 1432, Module Epidémiologie Clinique; Centre d'Investigation Clinique, Module Epidémiologie Clinique/Essais Cliniques<br/> Herbland, Alexandre; Centre hospitalier Saint Louis, Service de</p> |

|           |                                                                                                                                                                                                                                                                                                                                                                                                                                                                                                                                                                                                                                                                                                                                                                                                                                                                                                                                                                                                                                                                                                                                                                                                                                                                                                                                                                                                                                                                                                                                                                                                                                                                    |
|-----------|--------------------------------------------------------------------------------------------------------------------------------------------------------------------------------------------------------------------------------------------------------------------------------------------------------------------------------------------------------------------------------------------------------------------------------------------------------------------------------------------------------------------------------------------------------------------------------------------------------------------------------------------------------------------------------------------------------------------------------------------------------------------------------------------------------------------------------------------------------------------------------------------------------------------------------------------------------------------------------------------------------------------------------------------------------------------------------------------------------------------------------------------------------------------------------------------------------------------------------------------------------------------------------------------------------------------------------------------------------------------------------------------------------------------------------------------------------------------------------------------------------------------------------------------------------------------------------------------------------------------------------------------------------------------|
|           | <p>Réanimation<br/> Jochmans, Sébastien; Centre hospitalier Sud-Ile-de France, Service de réanimation<br/> Devaquet, Jérôme; Hôpital Foch, Medical-Surgical Intensive Care Unit<br/> Benzekri, Dalila; Groupe Hospitalier Régional d'Orléans, Médecine Intensive Réanimation<br/> Vivier, Emmanuel; Hôpital Saint Joseph Saint Luc, Reanimation Polyvalente<br/> Nseir, Saad; CHU de Lille, Centre de Réanimation, Université de Lille<br/> Colin, Gwenhaël ; Centre Hospitalier Départemental de Vendée, Service de Médecine Intensive et Réanimation<br/> Thévenin, Didier; CH de Lens, Service de Réanimation Polyvalente<br/> Grasselli, Giacomo; Fondazione IRCCS Ca' Granda Ospedale Maggiore Policlinico, Department of Anesthesiology, Intensive Care and Emergency, Department of Pathophysiology and Transplantation<br/> Assefi, Mona; Department of Anesthesia and Critical Care Medicine, Multidisciplinary Intensive Care Unit, University Pierre and Marie Curie (UPMC)<br/> Guerin, Claude; Hôpital de La Croix-Rousse, Hospices civils de Lyon, Service de Médecine Intensive-Réanimation; Université de Lyon; INSERM 955, Créteil<br/> Bougon, David ; Centre Hospitalier Annecy Genevois, Service de Réanimation<br/> Lherm, Thierry; Hospital of Chartres, Medical ICU<br/> Kouatchet, Achille; Centre Hospitalier Universitaire d'Angers, Département de Réanimation Médicale et Médecine Hyperbare<br/> Ragot, Stéphanie; INSERM CIC 1402 ALIVE, Université de Poitiers, Faculté de Médecine et Pharmacie<br/> Thille, Arnaud; CHU de Poitiers, Médecine Intensive et Réanimation; INSERM CIC 1402, groupe ALIVE, Université de Poitiers</p> |
| Keywords: | immunosuppression, acute respiratory failure, noninvasive ventilation, high-flow nasal cannula oxygen therapy, clinical trial, mortality                                                                                                                                                                                                                                                                                                                                                                                                                                                                                                                                                                                                                                                                                                                                                                                                                                                                                                                                                                                                                                                                                                                                                                                                                                                                                                                                                                                                                                                                                                                           |

SCHOLARONE™  
Manuscripts

1  
2  
3 **High-flow nasal oxygen therapy alone or with noninvasive ventilation in**  
4 **immunocompromised patients admitted to ICU for acute hypoxemic respiratory**  
5 **failure: the randomised multicentre controlled FLORALI-IM protocol**  
6  
7  
8  
9

10 *Rémi Coudroy*<sup>1</sup>, *Jean-Pierre Frat*<sup>1</sup>, *Stephan Ehrmann*<sup>2</sup>, *Frédéric Pène*<sup>3</sup>, *Nicolas Terzi*<sup>4</sup>,  
11 *Maxens Decavèle*<sup>5</sup>, *Gwenaël Prat*<sup>6</sup>, *Charlotte Garret*<sup>7</sup>, *Damien Contou*<sup>8</sup>, *Jeremy*  
12 *Bourenne*<sup>9</sup>, *Arnaud Gacouin*<sup>10</sup>, *Christophe Girault*<sup>11</sup>, *Jean Dellamonica*<sup>12</sup>, *Dominique*  
13 *Malacrino*<sup>13</sup>, *Guylaine Labro*<sup>14</sup>, *Jean-Pierre Quenot*<sup>15</sup>, *Alexandre Herbland*<sup>16</sup>,  
14 *Sébastien Jochmans*<sup>17</sup>, *Jérôme Devaquet*<sup>18</sup>, *Dalila Benzekri*<sup>19</sup>, *Emmanuel Vivier*<sup>20</sup>,  
15 *Saad Nseir*<sup>21</sup>, *Gwenhaël Colin*<sup>22</sup>, *Didier Thevenin*<sup>23</sup>, *Giacomo Grasselli*<sup>24</sup>, *Mona*  
16 *Assefi*<sup>25</sup>, *Claude Guérin*<sup>26</sup>, *David Bougon*<sup>27</sup>, *Thierry Lherm*<sup>28</sup>, *Achille Kouatchet*<sup>29</sup>,  
17 *Stéphanie Ragot*<sup>30</sup>, *Arnaud W. Thille*<sup>1</sup>.  
18  
19  
20  
21  
22  
23  
24

25 Rémi Coudroy on behalf of REVA research network.  
26  
27

28  
29 **Affiliations:**

30 <sup>1</sup> Médecine Intensive et Réanimation, CHU de Poitiers, Poitiers, France ; INSERM CIC  
31 1402, groupe ALIVE, Université de Poitiers, Poitiers, France  
32

33 <sup>2</sup> CHRU de Tours, Médecine Intensive Réanimation, CIC 1415, CRICS-TriggerSEP  
34 research network, Centre d'étude des pathologies respiratoires, INSERM U1100,  
35 Université de Tours, Tours, France  
36  
37

38 <sup>3</sup> Médecine intensive & Réanimation, Hôpital Cochin, APHP, Université Paris  
39 Descartes, Paris, France  
40  
41

42 <sup>4</sup> Médecine Intensive Réanimation, INSERM, Université Grenoble-Alpes, U1042, HP2,  
43 Centre Hospitalier Universitaire Grenoble Alpes, Grenoble, France  
44

45 <sup>5</sup> Service de Pneumologie, Médecine Intensive et Réanimation, Département R3S,  
46 AP-HP ; INSERM, UMRS1158 Neurophysiologie Respiratoire Expérimentale et  
47 Clinique, Sorbonne Université, Groupe Hospitalier Pitié-Salpêtrière Charles Foix,  
48 Paris, France  
49  
50  
51

52 <sup>6</sup> Médecine Intensive Réanimation, CHU de Brest, Brest, France  
53

54 <sup>7</sup> Médecine Intensive Réanimation, CHU de Nantes, Nantes, France  
55

56 <sup>8</sup> Service de Réanimation Polyvalente, Centre Hospitalier Victor Dupouy, Argenteuil,  
57 France  
58  
59  
60

1  
2  
3 <sup>9</sup> CHU La Timone 2, Médecine Intensive Réanimation, Réanimation des Urgences,  
4 Aix-Marseille Université, Marseille, France

5  
6 <sup>10</sup> Service des Maladies Infectieuses et Réanimation Médicale, CHU de Rennes,  
7 Hôpital Ponchaillou, Rennes, France

8  
9  
10 <sup>11</sup> Service de Réanimation Médicale, Hôpital Charles Nicolle, CHU de Rouen,  
11 Normandie Univ, Unirouen, UPRES EA-3830, Rouen, France

12  
13 <sup>12</sup> Médecine Intensive Réanimation, Centre Hospitalier Universitaire de Nice, Nice,  
14 France

15  
16  
17 <sup>13</sup> Service de réanimation, Centre hospitalier de Béthune, Beuvry, France

18  
19 <sup>14</sup> Medical Intensive Care Unit, Hôpital Jean Minjot, Besançon, France ; Research  
20 Center EA3920, University of Franche-Comté, Besançon, France

21  
22 <sup>15</sup> Service de Médecine Intensive-Réanimation, CHU Dijon-Bourgogne, Dijon, France;  
23 INSERM U1231, Equipe Lipness, Dijon, France; Université Bourgogne-Franche-  
24 Comté, UMR1231 Lipides, Nutrition, Cancer, équipe Lipness, Dijon, France;  
25 LipSTIC LabEx, Fondation de coopération scientifique Bourgogne-Franche-Comté,  
26 Dijon, France; INSERM, CIC 1432, Module Epidémiologie Clinique, Dijon, France;  
27 CHU Dijon-Bourgogne, Centre d'Investigation Clinique, Module Epidémiologie  
28 Clinique/Essais Cliniques, Dijon, France

29  
30  
31 <sup>16</sup> Service de Réanimation, Centre hospitalier Saint Louis, La Rochelle, France

32  
33  
34 <sup>17</sup> Service de réanimation, Centre hospitalier Sud-Ile-de France, Melun, France

35  
36  
37 <sup>18</sup> Medical-Surgical Intensive Care Unit, Hôpital Foch, Suresnes, France

38  
39  
40 <sup>19</sup> Médecine Intensive Réanimation, Groupe Hospitalier Régional d'Orléans, Orléans,  
41 France

42  
43  
44 <sup>20</sup> Reanimation Polyvalente, Hôpital Saint Joseph Saint Luc, Lyon, France

45  
46  
47 <sup>21</sup> Centre de Réanimation, Université de Lille, CHU de Lille, Lille, France

48  
49  
50 <sup>22</sup> Service de Médecine Intensive et Réanimation, Centre Hospitalier Départemental  
51 de Vendée, La Roche-sur-Yon, France

52  
53  
54 <sup>23</sup> Service de Réanimation Polyvalente, CH de Lens, Lens, France

55  
56  
57 <sup>24</sup> Department of Anesthesiology, Intensive Care and Emergency, Fondazione IRCCS  
58 Ca' Granda Ospedale Maggiore Policlinico, Milan, Italy ; Department of  
59 Pathophysiology and Transplantation, University of Milan, Milan, Italy

60  
<sup>25</sup> Multidisciplinary Intensive Care Unit, Department of Anesthesia and Critical Care  
Medicine, Pitie-Salpetriere Hospital, Assistance Publique Hopitaux de Paris, School of  
Medicine, University Pierre and Marie Curie (UPMC), Paris, France

1  
2  
3 26 Service de Médecine Intensive-Réanimation, Hôpital de La Croix-Rousse, Hospices  
4 civils de Lyon, Lyon, France ; Université de Lyon, Lyon, France ; INSERM 955, Créteil,  
5 France  
6

7  
8 27 Service de Réanimation, Centre Hospitalier Annecy Genevois, Annecy, France  
9

10 28 Medical ICU, Hospital of Chartres, Coudray, France  
11

12 29 Medical Intensive Care Unit, Centre hospitalier universitaire d'Angers, Angers,  
13 France  
14

15 30 INSERM CIC 1402, Biostatistics, Université de Poitiers, France  
16  
17

### 18 **Authors' e-mail:**

19  
20 [r.coudroy@yahoo.fr](mailto:r.coudroy@yahoo.fr); [jean-pierre.frat@chu-poitiers.fr](mailto:jean-pierre.frat@chu-poitiers.fr); [stephanehrmann@gmail.com](mailto:stephanehrmann@gmail.com);  
21 [frederic.pene@aphp.fr](mailto:frederic.pene@aphp.fr); [nterzi@chu-grenoble.fr](mailto:nterzi@chu-grenoble.fr); [maxencesar@hotmail.fr](mailto:maxencesar@hotmail.fr);  
22 [gwenael.prat@chu-brest.fr](mailto:gwenael.prat@chu-brest.fr); [charlotte.garret@chu-nantes.fr](mailto:charlotte.garret@chu-nantes.fr); [damien.contou@ch-argenteuil.fr](mailto:damien.contou@ch-argenteuil.fr);  
23 [Jeremy.BOURENNE@ap-hm.fr](mailto:Jeremy.BOURENNE@ap-hm.fr); [arnaud.gacouin@chu-rennes.fr](mailto:arnaud.gacouin@chu-rennes.fr);  
24 [christophe.girault@chu-rouen.fr](mailto:christophe.girault@chu-rouen.fr); [dellamonica.j@chu-nice.fr](mailto:dellamonica.j@chu-nice.fr);  
25 [dominique.malacrino@gmail.com](mailto:dominique.malacrino@gmail.com); [guylainelabro@hotmail.fr](mailto:guylainelabro@hotmail.fr); [jean-pierre.quenot@chu-dijon.fr](mailto:jean-pierre.quenot@chu-dijon.fr);  
26 [Alexandre.HERBLAND@ch-larochelle.fr](mailto:Alexandre.HERBLAND@ch-larochelle.fr);  
27 [sebastien.jochmans@gmail.com](mailto:sebastien.jochmans@gmail.com); [j.devaquet@hopital-foch.org](mailto:j.devaquet@hopital-foch.org); [dalila.benzekri@ch-orleans.fr](mailto:dalila.benzekri@ch-orleans.fr);  
28 [evivier@ch-stjoseph-stluc-lyon.fr](mailto:evivier@ch-stjoseph-stluc-lyon.fr); [saadnseir@yahoo.fr](mailto:saadnseir@yahoo.fr);  
29 [gwenhael.colin@chd-vendee.fr](mailto:gwenhael.colin@chd-vendee.fr); [dthevenin@ch-lens.fr](mailto:dthevenin@ch-lens.fr); [jaku71@gmail.com](mailto:jaku71@gmail.com);  
30 [mona.assefi@aphp.fr](mailto:mona.assefi@aphp.fr); [claud.guerin@chu-lyon.fr](mailto:claud.guerin@chu-lyon.fr); [dbougon@ch-annecygenevois.fr](mailto:dbougon@ch-annecygenevois.fr);  
31 [tlherm@ch-chartres.fr](mailto:tlherm@ch-chartres.fr); [AcKouatchet@chu-angers.fr](mailto:AcKouatchet@chu-angers.fr); [stephanie.ragot@univ-poitiers.fr](mailto:stephanie.ragot@univ-poitiers.fr);  
32 [aw.thille@gmail.com](mailto:aw.thille@gmail.com)  
33  
34  
35  
36  
37  
38  
39  
40  
41  
42  
43  
44

### 45 **Corresponding author:**

46 Remi Coudroy, Service de Médecine Intensive et Réanimation, CHU de Poitiers, 2 rue  
47 la Milétrie, 86021 Poitiers Cedex, France.

48 E-mail: [r.coudroy@yahoo.fr](mailto:r.coudroy@yahoo.fr)

49 Phone: +33549444007  
50  
51  
52  
53  
54

55 **Trial registration number:** NCT02978300  
56  
57

### 58 **Contributors**

59  
60

1  
2  
3 RC, J-PF and AWT, in collaboration with all authors and the REVA Network designed  
4 the study and wrote the manuscript together. SR provided substantial contributions to  
5 the conception and design of the study, and wrote the statistical analysis plan and  
6 estimated the sample size with RC.  
7  
8  
9

10 All authors contributed for drafting the work, revising it critically for important intellectual  
11 content and approved the final version of the manuscript. All authors give their  
12 agreement to be accountable for all aspects of the work, and ensure the accuracy and  
13 integrity of any part of the work.  
14  
15  
16  
17

### 18 **Funding**

19  
20 The study was funded by the 'Programme Hospitalier de Recherche Clinique Inter-  
21 Régional 2015' of the French Ministry of Health. The study promoter is the University  
22 Hospital of Poitiers, Poitiers, France.  
23  
24  
25  
26

### 27 **Disclaimer**

28  
29 The firm Fisher & Paykel provided the high-flow oxygen therapy equipment and masks  
30 for noninvasive ventilation to all the participating centres but has no other involvement  
31 in the study.  
32  
33  
34  
35

### 36 **Competing interests**

37  
38 RC reports travel expense coverage to attend scientific meetings from Fisher & Paykel  
39 and MSD.  
40

41 JPF reports travel expense coverage to attend scientific meetings and personal fees  
42 from Fisher & Paykel and SOS Oxygène.  
43

44 SE reports consulting fees from Aerogen, La diffusion technique française, Baxter,  
45 Bayer, lecture fees from Aerogen, Fisher & Paykel, unrestricted research grants /  
46 research support from from Fisher & Paykel, Hamilton medical, Aerogen, La diffusion  
47 technique française.  
48  
49

50  
51 Chr G reports travel expense coverage to attend scientific meetings, personal fees and  
52 logistic support from Fisher & Paykel, Resmed and Lowenstein Medical.  
53

54 AWT reports travel expense coverage to attend scientific meetings and payment for  
55 lectures from Fisher & Paykel, Covidien, Maquet-Getinge, General Electric Healthcare.  
56

57  
58 SJ reports personal fees for lectures from Hamilton Medical and Nihon Kohden.  
59  
60

1  
2  
3 GG reports payment for lectures from Getinge, Draeger Medical, Pfizer,  
4 Fisher&Paykel, and travel/accommodation/congress registration support from Biotest  
5 and Getinge.  
6  
7

8 FP, NT, MD, GP, Cha G, DC, JB, AG, JD, DM, GL, JPQ, AH, JD, DB, EV, SN, GC, DT,  
9 MA, CI G, DB, TL, AK, SR and report no conflict of interest.  
10  
11  
12

### 13 **Ethics approval**

14  
15 The first version of the study protocol has been approved by the central ethics  
16 committee (Ethics Committee Ouest III, Poitiers, France) with the registration number  
17 2016-A00834-47 (23 March 2016).  
18  
19  
20  
21

### 22 **Provenance and peer review**

23 Not commissioned; externally peer reviewed.  
24  
25  
26  
27  
28  
29  
30  
31  
32  
33  
34  
35  
36  
37  
38  
39  
40  
41  
42  
43  
44  
45  
46  
47  
48  
49  
50  
51  
52  
53  
54  
55  
56  
57  
58  
59  
60



**ABSTRACT (271 words)**

**Introduction:** Recent practice guidelines suggest applying noninvasive ventilation (NIV) as first-line therapy in management of immunocompromised patients admitted to intensive care unit (ICU) for acute hypoxemic respiratory failure. By pooling all randomised controlled trials, application of NIV is associated with decreased intubation and mortality rates as compared to standard oxygen. However, recent studies including large sample size trials have found similar outcomes with or without NIV or even deleterious effects of NIV in patients with acute hypoxemic respiratory failure. Therefore, given the uncertainty in the evidence, application of NIV is only a conditional recommendation.

All previous studies have compared NIV to standard oxygen and not to high-flow nasal oxygen therapy (HFOT). Several studies have found lower mortality rates using HFOT alone than using HFOT with NIV sessions in patients with de novo respiratory failure, and even in immunocompromised patients. We are hypothesizing that HFOT alone is more effective than HFOT with NIV sessions and reduces mortality of immunocompromised patients with acute hypoxemic respiratory failure.

**Methods and analysis:** This study is an investigator-initiated, multicentre randomised controlled trial comparing HFOT alone or with NIV in immunocompromised patients admitted to ICU for severe acute hypoxemic respiratory failure. Around 280 patients will be randomised with a 1:1 ratio in two groups. The primary outcome is the mortality rate at day 28 after enrolment. Secondary outcomes include the rate of intubation in each group, length of ICU and hospital stay, and mortality up to day 180.

**Ethics and dissemination:** The study has been approved by the ethics committee and patients will be included after informed consent. The results will be submitted for publication in peer-reviewed journals.

**Trial registration number:** NCT02978300

**Keywords:** immunosuppression, acute respiratory failure, noninvasive ventilation, high-flow nasal cannula oxygen therapy, clinical trial, mortality

### Strengths and limitations of the study

- This trial is the first to compare high-flow nasal oxygen therapy (HFOT) alone versus HFOT with non-invasive ventilation (NIV) sessions for treatment of acute hypoxemic respiratory failure in immunocompromised patients admitted to ICU.
- This trial is empowered to compare mortality rates in patients with severe acute hypoxemic respiratory failure.
- Settings of each oxygenation technique will be protocolised to optimise their efficiency according to physiological studies.
- Limitation: The individual study assignments of the patients will not be masked. Given the nature of the two strategies under evaluation, a double-blind trial is not possible.

**Word count: 3582**

## INTRODUCTION

### Background and rationale

Acute hypoxemic respiratory failure is the leading cause of admission to intensive care units (ICU) in immunocompromised patients.<sup>1</sup> Intubation and subsequent invasive mechanical ventilation are needed in about two-thirds of cases and are associated with particularly high mortality reaching 50-70% of cases.<sup>1-3</sup> Therefore, it is crucial to assess the best strategy of oxygenation with the aim of avoiding the need for intubation in immunocompromised patients.

The recent European/American clinical practice guidelines have recommended noninvasive ventilation (NIV) as first-line therapy for management of acute hypoxemic respiratory failure in immunocompromised patients.<sup>4</sup> Indeed, by pooling all randomised controlled trials, NIV was associated with decreased intubation and mortality rates as compared to standard oxygen (**Table 1**).<sup>5-8</sup> However, the largest randomised controlled trial comparing NIV versus standard oxygen found no difference in intubation or mortality rates and, application of NIV was consequently only a conditional recommendation.<sup>5</sup>

All previous studies have compared NIV to standard oxygen and not versus high-flow nasal oxygen therapy (HFOT).<sup>4</sup> More recently, better outcomes have been reported with HFOT than with standard oxygen, and even as compared to HFOT with NIV in patients with acute hypoxemic respiratory failure, thereby suggesting potential deleterious effects of NIV.<sup>9-11</sup> NIV may be associated with harmful effects in *de novo* respiratory failure,<sup>12</sup> especially in patients generating strong inspiratory efforts and subsequent large tidal volumes due to high transpulmonary pressures.<sup>13,14</sup> It could be argued that NIV protocol was not protective enough, *i.e.* by applying low levels of pressure-support to avoid large tidal volumes that may worsen underlying lung injury,<sup>15</sup> by applying high levels of positive end-expiratory pressure (PEEP) to promote alveolar recruitment as is the case in patients invasively ventilated for acute respiratory distress syndrome (ARDS),<sup>16,17</sup> and by applying prolonged sessions of NIV to avoid derecruitment during NIV breakoffs.<sup>18,19</sup> Indeed, while most of these patients meet the clinical criteria for ARDS,<sup>20</sup> optimisation of ventilator settings during NIV could lead to better outcomes as it is the case in patients under invasive mechanical ventilation.

## Objectives

We aim to conduct a prospective multicentre randomised controlled trial comparing HFOT alone or with optimised NIV sessions in immunocompromised patients admitted to ICU for acute hypoxemic respiratory failure. Our hypothesis is that HFOT alone may reduce mortality rate at day 28 as compared to HFOT with NIV, despite application of NIV with protective ventilator settings.

### Primary objective

To compare the mortality rate at day 28 after inclusion between HFOT alone and HFOT with NIV in immunocompromised patients admitted to ICU for acute hypoxemic respiratory failure.

### Secondary objectives

- To compare the rates of intubation, and of mortality in ICU, in hospital, at day 90 and at day 180 after inclusion between the 2 strategies.
- To compare length of stay in ICU, in hospital, and the number of ventilator-free days (invasive or noninvasive mechanical ventilation) within the 28 days following inclusion.
- To compare tolerance between the 2 strategies.

### Trial design

The FLORALI-IM study is an investigator-initiated, prospective, multicentre, randomised, controlled, open trial comparing 2 strategies of oxygenation using HFOT alone or with NIV in immunocompromised patients admitted to ICU for acute hypoxemic respiratory failure. Patients will be randomly assigned to the HFOT alone group or HFOT with NIV group with a 1:1 ratio.

## METHODS: PATICIPANTS, INTERVENTIONS AND OUTCOMES

### Study setting

The FLORALI-IM study is taking place in 29 ICUs in France and 1 ICU in Italy.

### Eligibility criteria

#### *Inclusion criteria*

1  
2  
3 Adult immunocompromised patients admitted to ICU for acute hypoxemic respiratory  
4 failure are considered eligible.

5  
6 Acute hypoxemic respiratory failure is defined by respiratory rate  $\geq 25$  breaths/min,  
7 and a  $\text{PaO}_2/\text{FiO}_2 \leq 300$  mm Hg while spontaneously breathing under standard oxygen  
8 with oxygen flow rate of at least 10 l/min, under HFOT, or under NIV. For patients under  
9 standard oxygen,  $\text{FiO}_2$  is calculated according to the following formula:  $\text{FiO}_2 = 0.21 +$   
10  $0.03$  per supplemental litre of oxygen.<sup>12</sup>

11  
12  
13  
14  
15 Immunosuppression is defined by one of the following criteria<sup>21</sup>: hematologic  
16 malignancy (active or remitting for less than 5 years), allogenic stem cell  
17 transplantation in the last 5 years, active solid cancer, leukopenia  $< 1$  G/l or  
18 neutropenia  $\leq 0.5$  G/l induced by chemotherapy, solid organ transplantation, acquired  
19 immunodeficiency syndrome, systemic steroids  $\geq 0.5$  mg/kg/day of prednisone  
20 equivalent for at least 3 weeks, immunosuppressive or immunomodulatory drugs.

### 26 27 *Exclusion criteria*

28  
29 Patients fulfilling one of the following criteria will not be included:  $\text{PaCO}_2$  above 50 mm  
30 Hg, patients who could strongly benefit from NIV *i.e.* with underlying chronic lung  
31 disease, cardiogenic pulmonary oedema or postoperative patients; severe shock  
32 defined as vasopressor dose  $> 0.3$   $\mu\text{g}/\text{kg}/\text{min}$  of norepinephrine-equivalent to maintain  
33 systolic blood pressure  $> 90$  mm Hg or with impaired consciousness with a Glasgow  
34 coma score  $\leq 12$ ; patients with urgent need for intubation or with do-not-intubate order  
35 at time of inclusion; or patients with contraindication to NIV according to the French  
36 consensus conference,<sup>22</sup> *i.e.* patient refusal, cardiorespiratory arrest, coma, non-  
37 drained pneumothorax, unresolved vomiting, upper airway obstruction, hematemesis,  
38 or severe facial trauma.

### 47 48 **Intervention**

49  
50 Patients eligible for inclusion will be informed, asked for consent and then randomised  
51 within the first 6 hours after they meet inclusion criteria to be assigned to one of the 2  
52 following groups: 1) The patients assigned to control group will receive HFOT with NIV  
53 sessions; 2) The patients assigned to interventional group will receive HFOT alone.

54  
55 As NIV may be more effective in hematologic or neutropenic patients,<sup>6</sup> randomization  
56 will be stratified according to the existence of underlying hematologic malignancy,  
57 leukopenia  $< 1$  G/l or neutropenia  $\leq 0.5$  G/l induced by chemotherapy.  
58  
59  
60

1  
2  
3  
4  
5 *Interventional group: HFOT alone*

6 Immediately after randomisation, patients assigned to the interventional group will be  
7 continuously treated by HFOT (Optiflow or AIRVO2, Fisher & Paykel, Auckland, New  
8 Zealand) with a flow of 60 l/min and FiO<sub>2</sub> adjusted to obtain adequate oxygenation  
9 (SpO<sub>2</sub> ≥ 92%) through a heated humidifier (MR 850, Fisher & Paykel, Auckland, New  
10 Zealand) set to the 'intubation' position.  
11  
12  
13  
14  
15

16  
17 *Control group: HFOT with NIV*

18 Immediately after randomisation, NIV will be initiated with a first session of at least 4h  
19 until clinical improvement and then applied by sessions of at least 1h for a minimal  
20 duration of at least 12 hours a day. NIV will be carried out with a ventilator dedicated  
21 for NIV (ICU ventilator after activation of NIV mode or NIV bi-level ventilator) in  
22 pressure-support (PS) ventilatory mode with a minimal PS level of 5 cm H<sub>2</sub>O targeting  
23 a tidal volume of 6 ml/kg of predicted body weight and avoiding tidal volumes  
24 exceeding 8 ml/kg, a PEEP level of at least 8 cm H<sub>2</sub>O, and FiO<sub>2</sub> adjusted to obtain  
25 adequate oxygenation (SpO<sub>2</sub> ≥ 92%). Between NIV sessions, HFOT will be delivered  
26 as in the interventional group.  
27  
28  
29  
30  
31  
32  
33  
34  
35

36 *Duration of treatment*

37 In the 2 groups, strategies of oxygenation will be applied for a minimal duration of 48h.  
38 After that, continuation of the treatment will be decided according to patient respiratory  
39 status (**Figure 1**).  
40  
41  
42  
43

44 *Criteria for weaning oxygenation strategies*

45 As there is no consensual method of weaning from HFOT or NIV, we propose a  
46 standardised weaning protocol to mitigate differences between centres. From 48h after  
47 enrolment, weaning from both oxygenation strategies will be assessed twice a day  
48 during the investigator's round.  
49  
50  
51

52 In the HFOT alone group, HFOT will be stopped and switched to standard oxygen  
53 when respiratory rate is < 25 breaths/min and SpO<sub>2</sub> ≥ 92% with FiO<sub>2</sub> ≤ 50% and flow  
54 ≤ 50 L/min.  
55  
56  
57  
58  
59  
60

1  
2  
3 In the NIV group, NIV will be stopped first when respiratory rate is < 25 breaths/min  
4 and SpO<sub>2</sub> ≥ 92% with FiO<sub>2</sub> ≤ 50%, and then HFOT will be stopped and switched to  
5 standard oxygen as in the HFOT alone group.  
6  
7

8 At any time after weaning of oxygenation techniques, if respiratory rate is ≥ 25  
9 breaths/min or SpO<sub>2</sub> < 92% HFOT or HFOT with NIV sessions will be resumed  
10 according to the randomisation group.  
11  
12  
13

### 14 *Prespecified intubation criteria*

15  
16 In order to avoid harmful effects of delayed intubation in patients treated with NIV<sup>23,24</sup>  
17 and HFOT,<sup>25</sup> intubation will be performed if at least one of the following criteria is  
18 fulfilled: neurological failure defined as agitation or altered consciousness defined as a  
19 Glasgow coma scale below 12 points, hemodynamic failure defined as the need for a  
20 dose of norepinephrine greater than 0.3 µg/kg/min of norepinephrine-equivalent to  
21 maintain systolic blood pressure greater than 90 mm Hg, persisting or worsening  
22 respiratory failure defined by the presence of at least 2 criteria among the following:  
23 respiratory rate > 40 /min, lack of improvement of high respiratory muscle workload,  
24 severe hypoxemia defined as a need for FiO<sub>2</sub> of 100% to maintain SpO<sub>2</sub> ≥ 92% or  
25 PaO<sub>2</sub>/FiO<sub>2</sub> ≤ 100 mm Hg, and acidosis defined as pH < 7.35 units.  
26  
27  
28  
29  
30  
31  
32  
33  
34  
35

### 36 **Outcomes**

#### 37 *Primary outcome*

38 The primary outcome is mortality at day 28 after randomization.  
39  
40  
41  
42

#### 43 *Secondary outcomes*

44 Secondary outcome variables include the following:  
45

- 46 1. Mortality in ICU, in hospital, at day 90 and at day 180,
- 47 2. Intubation at day 28 from randomization.
- 48 3. Length of stay in ICU and in hospital,
- 49 4. Number of ventilator-free days, and number of oxygenation techniques-free  
50 days within the 28 days following randomization,
- 51 5. Tolerance of oxygenation techniques.  
52  
53  
54  
55  
56  
57

### 58 **Sample size**

59  
60

1  
2  
3 We determined that enrolment of 280 analysable patients would provide a power of  
4 80% to show an absolute difference of 15% in the rate of mortality at day 28 after  
5 randomization between the control group using HFOT with NIV (mortality rate  
6 estimated of 35%) and the intervention group using HFOT alone (mortality rate  
7 estimated of 20%). As NIV may be more effective according to the type of  
8 immunosuppression, stratification will be performed in order to have the same number  
9 of patients with hematologic malignancy, leukopenia or neutropenia induced by  
10 chemotherapy in each group.  
11  
12  
13  
14  
15  
16  
17  
18

### 19 **Estimated rates of mortality in the two groups**

20 The estimated mortality rates in the two groups are based on the recent literature.  
21 Mortality rates at day 28 reported in patients treated with HFOT and NIV are particularly  
22 homogeneous: 37% in a retrospective monocentre study,<sup>26</sup> 38% in a post-hoc analysis  
23 of a randomized trial,<sup>9</sup> and 36% in our preliminary study.<sup>10</sup> A lower mortality rate (24%)  
24 has been reported in patients treated with NIV in a randomised trial.<sup>5</sup> However, this  
25 difference could be explained by the lower severity of respiratory failure at admission.  
26 According to our previous studies, we can estimate a mortality rate of 20% in the  
27 interventional group.<sup>9,10</sup> A recent trial reported a mortality rate of 36% in patients  
28 treated with HFOT alone.<sup>27</sup> However, a high proportion of patients died without prior  
29 intubation in the HFOT alone group (55 patients, 40%), *i.e.* with a do-not-intubate order,  
30 and the actual mortality rate was closer to 25% after exclusion of these patients.  
31  
32  
33  
34  
35  
36  
37  
38  
39  
40

### 41 **Recruitment**

42 Initial expected duration of patient enrolment is 2 years, starting in January 2017.

- 43 • End of 2015: grant award;
- 44 • 2016: approval by an independent ethics committee;
- 45 • 2017: inclusion of patients;
- 46 • 2019: end of inclusions, monitoring of participating centres and queries to  
47 investigators; overseeing by the steering committee at the REVA Network  
48 meetings; blind review to determine protocol violation, to define intention-to-treat  
49 and per-protocol analysis populations; new queries to investigators, cleaning and  
50 closure of the database;
- 51 • 2020-2021: data analysis, writing of the manuscript and submission for publication.  
52  
53  
54  
55  
56  
57  
58  
59  
60



## **METHODS: ASSIGNMENT OF INTERVENTION, DATA COLLECTION, MANAGEMENT AND ANALYSIS**

### **Allocation and sequence intervention**

A computer-generated randomization is performed with stratification according to centre and the type of immunosuppression (haematological malignancy or leukopenia < 1 G/l or neutropenia  $\leq$  0.5 G/l vs. the others types of immunosuppression) in a 1:1 ratio and by blocks, using a centralized web-based management system (Clinfile). After randomization, the strategy assigned to the patient (HFOT alone or with NIV) will be initiated immediately.

### **Data collection and management**

Data will be collected on an electronic-Case Report Form by a trained investigator or research assistant at each centre (**Figure 2**). At time of inclusion, the following data will be collected: informed consent, demographic characteristics, Charlson score,<sup>28</sup> vital signs, current oxygenation settings (oxygen flow under standard oxygen, FiO<sub>2</sub> and gas flow under HFOT, and FiO<sub>2</sub>, pressure-support levels and PEEP under NIV), tolerance to oxygenation devices using a visual analogic scale, arterial blood gases and analysis of chest X-ray. Similar data and an evaluation of dyspnoea using a 5-point Likert scale will be recorded at H1, between H6 and H12, at H24  $\pm$  6h, H48  $\pm$  6h and H72  $\pm$  6h after randomization. Duration of the first NIV session and total duration of NIV within the first 24h, between H24 and H48 and between H48 and H72 will be collected to ensure adherence to the protocol. The type of ventilator used for NIV and the NIV interface will be collected. For intubated patients, time and reason for intubation will be documented according to the above-mentioned criteria. Invasive ventilatory settings, arterial blood gases and chest X-ray will be recorded during the first 3 days following intubation. At day 28, vital status, need for intubation, total duration of invasive ventilation and of each oxygenation technique studied will be recorded. At ICU and hospital discharge, vital status and length of stay will be collected. At day 90 and day 180, vital status and Eastern Cooperative Oncology Group score will be recorded.<sup>29</sup>

As the absence of aetiology of acute respiratory failure could influence mortality,<sup>30</sup> investigators are strongly encouraged to have an active diagnostic strategy. Results of

1  
2  
3 the noninvasive diagnostic tests, bronchoalveolar lavage and chest CT-scan will be  
4 collected. [23]  
5  
6  
7

## 8 **Statistical methods**

9  
10 All the analyses will be performed by the study statistician according to a predefined  
11 statistical analysis plan and using statistical software (SAS, V.9.4; SAS Institute; USA).  
12 A two-tailed P value of less than 0.05 will be considered as indicating statistical  
13 significance.  
14  
15  
16

### 17 *Descriptive analysis of patient groups at baseline*

18  
19 Continuous variables will be summarized with the classic parameters of descriptive  
20 analysis (median, interquartile ranges or mean and standard deviation), while  
21 indicating the number of missing data. The category variables will be presented in the  
22 form of absolute frequency and percentage in each modality. The analysis will be  
23 performed on an intention-to-treat basis, including all patients who underwent  
24 randomisation. Deviations from the protocol will be described and analysed on a case-  
25 by-case basis after validation by a blind review committee.  
26  
27  
28  
29  
30  
31

32 No imputation for missing values will be done.  
33  
34  
35

### 36 *Analysis pertaining to the main criteria of evaluation*

37 Mortality rates at day 28 after randomization will be compared between the 2 groups  
38 by means of a Chi<sup>2</sup> test. The analysis of this primary outcome will subsequently be  
39 completed by multivariate logistic regression after testing for interactions between  
40 treatment effect and strata.  
41  
42  
43

44 The survival time will be described by means of Kaplan–Meier method and compared  
45 with a log-rank test at day 28. A Cox proportional-hazards model will be used to  
46 calculate hazard ratio with 95% confidence interval.  
47  
48

49 Logistic and Cox regression maximal models will include all the variables associated  
50 with mortality at day 28 with a p value <0.20 in the univariate analysis. The final model  
51 will be obtained by a backward-selection procedure and will include variables  
52 significantly associated with mortality at day 28 with a P value of less than 0.05.  
53  
54  
55  
56  
57

### 58 *Analysis pertaining to the secondary criteria of evaluation*

1  
2  
3 Lengths of stay, number of ventilator-free days and number of oxygenation techniques-  
4 free days will be compared between the two treatment groups using the Student's t-  
5 Test (or Mann-Whitney test if necessary). Time to ICU death, time to hospital death or  
6  
7 Time to intubation will be described by means of Kaplan Meier method and compared  
8  
9 between the two treatment groups with a logrank test. Efficacy and tolerance of  
10 oxygenation techniques will be compared between the 2 groups using Student's t-Test  
11  
12 (or Mann-Whitney test) for quantitative variables and Chi<sup>2</sup> test for qualitative variables.  
13  
14 Ventilator-free days at day 28 will be calculated as one point for each day between  
15  
16 enrolment to day 28 that patients are both alive and free of mechanical ventilation.  
17  
18  
19

### 20 **Predetermined Subgroup Analysis**

21  
22 Randomization is stratified according to the type of immunosuppression in order to  
23  
24 have the same number of patients with hematologic malignancy, leukopenia or  
25  
26 neutropenia induced by chemotherapy in each group. A subgroup analysis will  
27  
28 consequently be performed for the main and secondary criteria of evaluation in this  
29  
30 subgroup of patients and in patients with other type of immunosuppression. Prior to  
31  
32 adjustment, an interaction test will be carried out to detect heterogeneity of treatment  
33  
34 effect according to the type of immunosuppression.

35  
36 As benefits of HFOT may be influenced by baseline PaO<sub>2</sub>/FiO<sub>2</sub>, a subgroup analysis  
37  
38 will be performed for the main and secondary criteria of evaluation in patients with a  
39  
40 PaO<sub>2</sub>/FiO<sub>2</sub> ≤ 200 mm Hg at enrolment.

### 41 *Data monitoring*

42  
43 An investigator at each centre will be responsible for daily patient screening, enrolling  
44  
45 patients in the study, ensuring adherence to the protocol and completing the e-CRF.  
46  
47 Research assistants will regularly monitor all the centres on site to check adherence  
48  
49 to the protocol and accuracy of the data recorded.  
50

### 51 *Patient and public involvement*

52  
53 Patients and public were not involved in the study  
54  
55  
56  
57

## 58 **ETHICS AND DISSEMINATION**

### 59 *Consent or assent*

60

1  
2  
3 Patients will be included after verification of the eligibility criteria and having provided  
4 an informed consent to the investigator according to the decision of the central ethics  
5 committee. For patients not able to provide informed consent, their next-of-kin will be  
6 contacted according to the same procedure. Patients will be informed as soon as  
7 possible by the investigator of their participation in the study and their consent to  
8 continue to participate in the study will be retrieved.  
9  
10  
11  
12  
13  
14

### 15 *Confidentiality*

16 Data will be handled according to French law. All original records will be archived at  
17 trial sites for 25 years. The clean database file will be de-identified and kept for 25  
18 years.  
19  
20  
21  
22

### 23 *Declaration of interest*

24 The FLORALI-IM study is an investigator-initiated trial supported by the French  
25 Ministry of Health with funds obtained in 2015 from an inter-regional hospital clinical  
26 research program ('Programme Hospitalier de Recherche Clinique Inter-Régional  
27 2015'). The European research network REVA has endorsed the study project. The  
28 study is promoted by the University Hospital of Poitiers. The study promoter received  
29 a grant from ADAIRC and SOS oxygène. The firm Fisher & Paykel Healthcare  
30 provides high-flow oxygen therapy equipment and face masks for NIV to all the  
31 participating centres but has no other involvement in the study.  
32  
33  
34  
35  
36  
37  
38  
39  
40

### 41 *Access to data*

42 All investigators will have access to the final data set. Participant-level data sets will  
43 be made accessible on a controlled access basis.  
44  
45  
46  
47

### 48 *Dissemination policy*

49 Findings will be published in peer-reviewed journals and presented at local, national  
50 and international meetings and conferences to publicize and explain the research to  
51 clinicians, commissioners and service users.  
52  
53  
54  
55  
56  
57

## 58 **DISCUSSION**

1  
2  
3 In immunocompromised patients, invasive ventilation is associated with particularly  
4 high mortality rates and application of NIV is currently recommended as a means of  
5 avoiding intubation.<sup>4</sup> Almost 20 years ago, two randomised controlled trials including a  
6 small sample of patients reported decreased intubation and mortality rates with NIV as  
7 compared to standard oxygen therapy.<sup>6,7</sup> By contrast, more recent studies including  
8 larger samples of patients found either similar outcomes or even an increased risk of  
9 mortality in patients treated with NIV compared to oxygen alone.<sup>5,9</sup> In a large controlled  
10 trial including 376 immunocompromised patients, outcomes were similar between  
11 patients treated with NIV and those treated with oxygen therapy.<sup>5</sup> However, a high  
12 proportion of patients had mild respiratory failure, more than one-third of the patients  
13 in the control group received HFOT while those in the interventional group received  
14 short sessions of NIV, and all these factors together may have mitigated the difference  
15 between the 2 groups.<sup>5</sup> In a post-hoc analysis of a randomized controlled trial including  
16 82 immunocompromised patients with severe acute hypoxemic respiratory failure,  
17 patients treated with HFOT alone had lower mortality than those treated with HFOT  
18 with NIV sessions.<sup>9</sup>

19  
20  
21 To explain the lack of effect or harmful effects of NIV, it could be argued that NIV was  
22 not carried out with optimal ventilator settings for patients of whom the majority met the  
23 clinical criteria for ARDS. Indeed, they had particularly large tidal volumes under NIV,  
24 which could be associated with an increased risk of mortality by potential worsening of  
25 pre-existing lung injury.<sup>13–15,32,33</sup> PEEP levels remained relatively low whereas the  
26 treatment represents a major adjustment in ARDS patients, and NIV was applied for a  
27 duration of only 8h in mean within the first 24 hours.<sup>5,9</sup> Another study has found that  
28 NIV performed with helmet may be more efficient than with face mask.<sup>34</sup> Interestingly,  
29 patients treated with helmet also received lower pressure-support levels and higher  
30 PEEP levels than those treated with facemask, thereby highlighting the potential  
31 impact of ventilatory settings on outcomes.<sup>34</sup> Consequently, we decided to apply a  
32 protective NIV protocol aimed at avoiding large tidal volumes, and applying prolonged  
33 sessions of NIV with high PEEP levels.

34  
35  
36 In a recent large randomized controlled trial including 776 immunocompromised  
37 patients, mortality rates at day 28 did not differ between patients treated with HFOT  
38 and those treated with standard oxygen.<sup>27</sup> However, 40% of the deceased patients in  
39 the HFOT group died without prior intubation and the high proportion of patients with  
40 do-not-intubate order may have mitigated the beneficial effects of HFOT.<sup>27</sup> By contrast,  
41  
42  
43  
44  
45  
46  
47  
48  
49  
50  
51  
52  
53  
54  
55  
56  
57  
58  
59  
60

1  
2  
3 several studies have reported promising results of HFOT alone versus standard  
4 oxygen or NIV in patients with *de novo* respiratory failure, even in  
5 immunocompromised patients.<sup>9–12</sup>  
6  
7

8 The FLORALI-IM trial has several strengths. First, this will be the first study comparing  
9 HFOT alone versus HFOT with NIV sessions in immunocompromised patients.  
10  
11 Second, the study will include only severe patients with acute hypoxemic respiratory  
12 failure. Third, NIV will be optimized using low levels of pressure-support targeting a  
13 tidal volume between 6 and 8 ml/kg, PEEP levels at least 8 cm H<sub>2</sub>O, and duration of  
14 NIV more than 12h a day during the first 48h.  
15  
16  
17

18 In conclusion, the FLORALI-IM trial is an investigator-initiated randomised controlled  
19 trial empowered to test the hypothesis that HFOT alone may in comparison with HFOT  
20 and NIV decrease mortality rate at day 28 of immunocompromised patients admitted  
21 to ICU for acute respiratory failure. Innovative aspects include the 2 groups of  
22 treatment in this clinical setting and the optimised protocol to carry out NIV and HFOT.  
23  
24  
25  
26  
27  
28  
29  
30  
31  
32  
33  
34  
35  
36  
37  
38  
39  
40  
41  
42  
43  
44  
45  
46  
47  
48  
49  
50  
51  
52  
53  
54  
55  
56  
57  
58  
59  
60

## REFERENCES

1. Azoulay E, Mokart D, Pène F, et al. Outcomes of critically ill patients with hematologic malignancies: prospective multicenter data from France and Belgium--a groupe de recherche respiratoire en réanimation onco-hématologique study. *J Clin Oncol* 2013;31(22):2810–8.
2. for the Efraim investigators and the Nine-I study group, Azoulay E, Pickkers P, et al. Acute hypoxemic respiratory failure in immunocompromised patients: the Efraim multinational prospective cohort study. *Intensive Care Medicine* 2017;43(12):1808–19.
3. Gristina GR, Antonelli M, Conti G, et al. Noninvasive versus invasive ventilation for acute respiratory failure in patients with hematologic malignancies: a 5-year multicenter observational survey. *Crit Care Med* 2011;39(10):2232–9.
4. Rochweg B, Brochard L, Elliott MW, et al. Official ERS/ATS clinical practice guidelines: noninvasive ventilation for acute respiratory failure. *Eur Respir J* 2017;50(2).
5. Lemiale V, Mokart D, Resche-Rigon M, et al. Effect of Noninvasive Ventilation vs Oxygen Therapy on Mortality Among Immunocompromised Patients With Acute Respiratory Failure: A Randomized Clinical Trial. *JAMA* 2015;314(16):1711–9.
6. Hilbert G, Gruson D, Vargas F, et al. Noninvasive ventilation in immunosuppressed patients with pulmonary infiltrates, fever, and acute respiratory failure. *N Engl J Med* 2001;344(7):481–7.
7. Antonelli M, Conti G, Bui M, et al. Noninvasive ventilation for treatment of acute respiratory failure in patients undergoing solid organ transplantation: a randomized trial. *JAMA* 2000;283(2):235–41.
8. Squadrone V, Massaia M, Bruno B, et al. Early CPAP prevents evolution of acute lung injury in patients with hematologic malignancy. *Intensive Care Med* 2010;36(10):1666–74.
9. Frat J-P, Ragot S, Girault C, et al. Effect of non-invasive oxygenation strategies in immunocompromised patients with severe acute respiratory failure: a post-hoc analysis of a randomised trial. *Lancet Respir Med* 2016;4(8):646–52.
10. Coudroy R., Jamet A., Petua P., Robert R., Frat J.-P., Arnaud W.T. High-flow oxygen therapy through a nasal cannula versus noninvasive ventilation versus in immunocompromised patients with acute respiratory failure. *Ann Intensive Care* 2016;6(1):45
11. Sklar MC, Mohammed A, Orchanian-Cheff A, Del Sorbo L, Mehta S, Munshi L. The Impact of High-Flow Nasal Oxygen in the Immunocompromised Critically Ill: A Systematic Review and Meta-Analysis. *Respiratory Care* 2018;63(12):1555–66.
12. Frat J-P, Thille AW, Mercat A, et al. High-flow oxygen through nasal cannula in acute hypoxemic respiratory failure. *N Engl J Med* 2015;372(23):2185–96.
13. Carteaux G, Millán-Guilarte T, De Prost N, et al. Failure of Noninvasive Ventilation for De Novo Acute Hypoxemic Respiratory Failure: Role of Tidal Volume. *Crit Care Med* 2016;44(2):282–90.
14. Frat J-P, Ragot S, Coudroy R, et al. Predictors of Intubation in Patients With Acute Hypoxemic Respiratory Failure Treated With a Noninvasive Oxygenation Strategy. *Crit Care Med* 2018;46(2):208–15.
15. Brochard L, Slutsky A, Pesenti A. Mechanical Ventilation to Minimize Progression of Lung Injury in Acute Respiratory Failure. *Am J Respir Crit Care Med* 2017;195(4):438–42.

16. Briel M, Meade M, Mercat A, et al. Higher vs lower positive end-expiratory pressure in patients with acute lung injury and acute respiratory distress syndrome: systematic review and meta-analysis. *Jama* 2010;303:865–73.
17. Morais CCA, Koyama Y, Yoshida T, et al. High Positive End-Expiratory Pressure Renders Spontaneous Effort Noninjurious. *American Journal of Respiratory and Critical Care Medicine* 2018;197(10):1285–96.
18. Sehgal IS, Dhoria S, Agarwal R. High-Flow Nasal Cannula Oxygen in Respiratory Failure. *N Engl J Med* 2015;373(14):1374.
19. Navalesi P, Gregoretti C, Antonelli M. Noninvasive Ventilation and Outcomes Among Immunocompromised Patients. *JAMA* 2016;315(17):1902.
20. ARDS Definition Task Force, Ranieri VM, Rubenfeld GD, et al. Acute respiratory distress syndrome: the Berlin Definition. *JAMA* 2012;307(23):2526–33.
21. Rubin LG, Levin MJ, Ljungman P, et al. 2013 IDSA Clinical Practice Guideline for Vaccination of the Immunocompromised Host. *Clinical Infectious Diseases* 2014;58(3):e44–100.
22. 2006\_10\_12\_conference\_de\_consensus\_commune\_ventilation\_non\_invasive\_resume.pdf [Internet]. [cited 2018 Oct 11]; Available from: [https://www.srlf.org/wp-content/uploads/2015/12/2006\\_10\\_12\\_conference\\_de\\_consensus\\_commune\\_ventilation\\_non\\_invasive\\_resume.pdf](https://www.srlf.org/wp-content/uploads/2015/12/2006_10_12_conference_de_consensus_commune_ventilation_non_invasive_resume.pdf)
23. Carrillo A, Gonzalez-Diaz G, Ferrer M, et al. Non-invasive ventilation in community-acquired pneumonia and severe acute respiratory failure. *Intensive Care Medicine* 2012;38(3):458–66.
24. Esteban A, Frutos-Vivar F, Ferguson ND, et al. Noninvasive positive-pressure ventilation for respiratory failure after extubation. *N Engl J Med* 2004;350(24):2452–60.
25. Kang BJ, Koh Y, Lim C-M, et al. Failure of high-flow nasal cannula therapy may delay intubation and increase mortality. *Intensive Care Med* 2015;41(4):623–32.
26. Mokart D, Geay C, Chow-Chine L, et al. High-flow oxygen therapy in cancer patients with acute respiratory failure. *Intensive Care Medicine* 2015;41(11):2008–10.
27. Azoulay E, Lemiale V, Mokart D, et al. Effect of High-Flow Nasal Oxygen vs Standard Oxygen on 28-Day Mortality in Immunocompromised Patients With Acute Respiratory Failure: The HIGH Randomized Clinical Trial. *JAMA* 2018;320(20):2099–2107.
28. Charlson ME, Pompei P, Ales KL, MacKenzie CR. A new method of classifying prognostic comorbidity in longitudinal studies: development and validation. *J Chronic Dis* 1987;40(5):373–83.
29. Oken MM, Creech RH, Tormey DC, et al. Toxicity and response criteria of the Eastern Cooperative Oncology Group. *Am J Clin Oncol* 1982;5(6):649–55.
30. Contejean A, Lemiale V, Resche-Rigon M, et al. Increased mortality in hematological malignancy patients with acute respiratory failure from undetermined etiology: a Groupe de Recherche en Réanimation Respiratoire en Onco-Hématologique (Grrr-OH) study. *Ann Intensive Care* 2016;6(1):102.
31. Azoulay É, Mokart D, Lambert J, et al. Diagnostic Strategy for Hematology and Oncology Patients with Acute Respiratory Failure: Randomized Controlled Trial. *American Journal of Respiratory and Critical Care Medicine* 2010;182(8):1038–46.



- 1  
2  
3 32. Bellani G, Laffey JG, Pham T, et al. Noninvasive Ventilation of Patients with Acute Respiratory  
4 Distress Syndrome. Insights from the LUNG SAFE Study. *Am J Respir Crit Care Med*  
5 2017;195(1):67–77.  
6  
7 33. Slutsky AS, Ranieri VM. Ventilator-induced lung injury. *The New England journal of medicine*  
8 2013;369:2126–36.  
9  
10 34. Patel BK, Wolfe KS, Pohlman AS, Hall JB, Kress JP. Effect of Noninvasive Ventilation Delivered  
11 by Helmet vs Face Mask on the Rate of Endotracheal Intubation in Patients With Acute  
12 Respiratory Distress Syndrome: A Randomized Clinical Trial. *JAMA* 2016;315(22):2435–41.  
13  
14  
15  
16  
17  
18  
19  
20  
21  
22  
23  
24  
25  
26  
27  
28  
29  
30  
31  
32  
33  
34  
35  
36  
37  
38  
39  
40  
41  
42  
43  
44  
45  
46  
47  
48  
49  
50  
51  
52  
53  
54  
55  
56  
57  
58  
59  
60

For peer review only

**Table 1. Characteristics and outcomes of previous trials comparing noninvasive ventilation to oxygen therapy in immunocompromised patients.** Outcomes of patients in the control arm are displayed in italics.

| <b>Authors</b>                 | <b>Year</b> | <b>Setting</b>   | <b>N=</b>             | <b>Arms</b>                         | <b>Intubation rate</b>   | <b>In-ICU mortality rate</b>               |
|--------------------------------|-------------|------------------|-----------------------|-------------------------------------|--------------------------|--------------------------------------------|
| <i>Antonelli et al.</i>        | 2000        | ICU, monocentre  | <i>20</i><br>20       | <i>O<sub>2</sub></i><br>NIV         | <i>70%</i><br>20%        | <i>50%</i><br>20%                          |
| <i>Hilbert et al.</i>          | 2001        | ICU, monocentre  | <i>26</i><br>26       | <i>O<sub>2</sub></i><br>NIV         | <i>77%</i><br>46%        | <i>69%</i><br>38%                          |
| <i>Lemiale et al.</i>          | 2015        | ICU, multicentre | <i>183</i><br>191     | <i>O<sub>2</sub></i><br>NIV         | <i>45%</i><br>38%        | <i>25%</i><br>21%                          |
| <i>Squadrone et al.</i>        | 2010        | Ward, monocentre | <i>20</i><br>20       | <i>O<sub>2</sub></i><br>CPAP        | <i>40%</i><br>10%        | <i>75%<sup>1</sup></i><br>15% <sup>1</sup> |
| <i>Frat et al.<sup>2</sup></i> | 2015        | ICU, multicentre | <i>30</i><br>26<br>26 | <i>O<sub>2</sub></i><br>NIV<br>HFOT | <i>43%</i><br>65%<br>31% | <i>20%</i><br>42%<br>15%                   |

<sup>1</sup> Hospital mortality (ICU mortality was not indicated in the article); <sup>2</sup> post-hoc analysis of a randomised trial.

CPAP: continuous positive airway pressure; HFOT: high-flow nasal cannula oxygen therapy; O<sub>2</sub>: oxygen therapy; NIV: noninvasive ventilation

1  
2  
3 **FIGURE LEGENDS**  
4  
5

6 **Figure 1:** Flow chart of the patients and study design.  
7

8 **Figure 2:** Flow chart of timing collection of different variables.  
9  
10  
11  
12  
13  
14  
15  
16  
17  
18  
19  
20  
21  
22  
23  
24  
25  
26  
27  
28  
29  
30  
31  
32  
33  
34  
35  
36  
37  
38  
39  
40  
41  
42  
43  
44  
45  
46  
47  
48  
49  
50  
51  
52  
53  
54  
55  
56  
57  
58  
59  
60

For peer review only

**Abbreviations:**

FiO<sub>2</sub>: Fraction of inspired oxygen

HFOT: High flow nasal cannula oxygen therapy

ICU: Intensive care unit

NIV: Noninvasive ventilation

PaO<sub>2</sub>: Partial pressure of arterial oxygen

PaCO<sub>2</sub>: Partial pressure of arterial carbon dioxide

SpO<sub>2</sub>: Peripheral capillary oxygen saturation

For peer review only

### Authors Contributions

RC, J-PF and AWT, in collaboration with all authors and the REVA Network designed the study and wrote the manuscript together. SR provided substantial contributions to the conception and design of the study, and wrote the statistical analysis plan and estimated the sample size with RC

All authors contributed for drafting the work, revising it critically for important intellectual content and approved the final version of the manuscript. All authors give their agreement to be accountable for all aspects of the work, and ensure the accuracy and integrity of any part of the work.

### Funding

The study was funded by the 'Programme Hospitalier de Recherche Clinique Inter-régional 2015' of the French Ministry of Health. The study promoter is the University Hospital of Poitiers, Poitiers, France.

The study promoter received financial grants from SOS Oxygène and AADAIRC.

### Disclaimer

The firm Fisher & Paykel provides the high-flow oxygen therapy equipment and the noninvasive masks to all the participating centres but has no other involvement in the study.

### Competing interests

RC reports travel expense coverage to attend scientific meetings from Fisher & Paykel and MSD.

JPF reports travel expense coverage to attend scientific meetings and personal fees from Fisher & Paykel and SOS Oxygène.

SE reports consulting fees from Aerogen, La diffusion technique française, Baxter, Bayer, lecture fees from Aerogen, Fisher & Paykel, unrestricted research grants / research support from from Fisher & Paykel, Hamilton medical, Aerogen, La diffusion technique française.

Chr G reports travel expense coverage to attend scientific meetings, personal fees and logistic support from Fisher & Paykel, Resmed and Lowenstein Medical.

AWT reports travel expense coverage to attend scientific meetings and payment for lectures from Fisher & Paykel, Covidien, Maquet-Getinge, General Electric Healthcare.

1  
2  
3 SJ reports personal fees for lectures from Hamilton Medical and Nihon Kohden.

4 GG reports payment for lectures from Getinge, Draeger Medical, Pfizer,  
5 Fisher&Paykel, and travel/accommodation/congress registration support from Biotest  
6 and Getinge.  
7  
8

9  
10 FP, NT, MD, GP, Cha G, DC, JB, AG, JD, DM, GL, JPQ, AH, JD, DB, EV, SN, GC, DT,  
11 MA, CI G, DB, TL, AK, SR and report no conflict of interest.  
12  
13

### 14 15 **Ethics approval**

16 The study has been approved by the central ethics committee (Ethics Committee  
17 Ouest III, Poitiers, France) with the registration number 2016-A00834-47 (23 March  
18 2016).  
19  
20  
21  
22  
23  
24  
25  
26  
27  
28  
29  
30  
31  
32  
33  
34  
35  
36  
37  
38  
39  
40  
41  
42  
43  
44  
45  
46  
47  
48  
49  
50  
51  
52  
53  
54  
55  
56  
57  
58  
59  
60

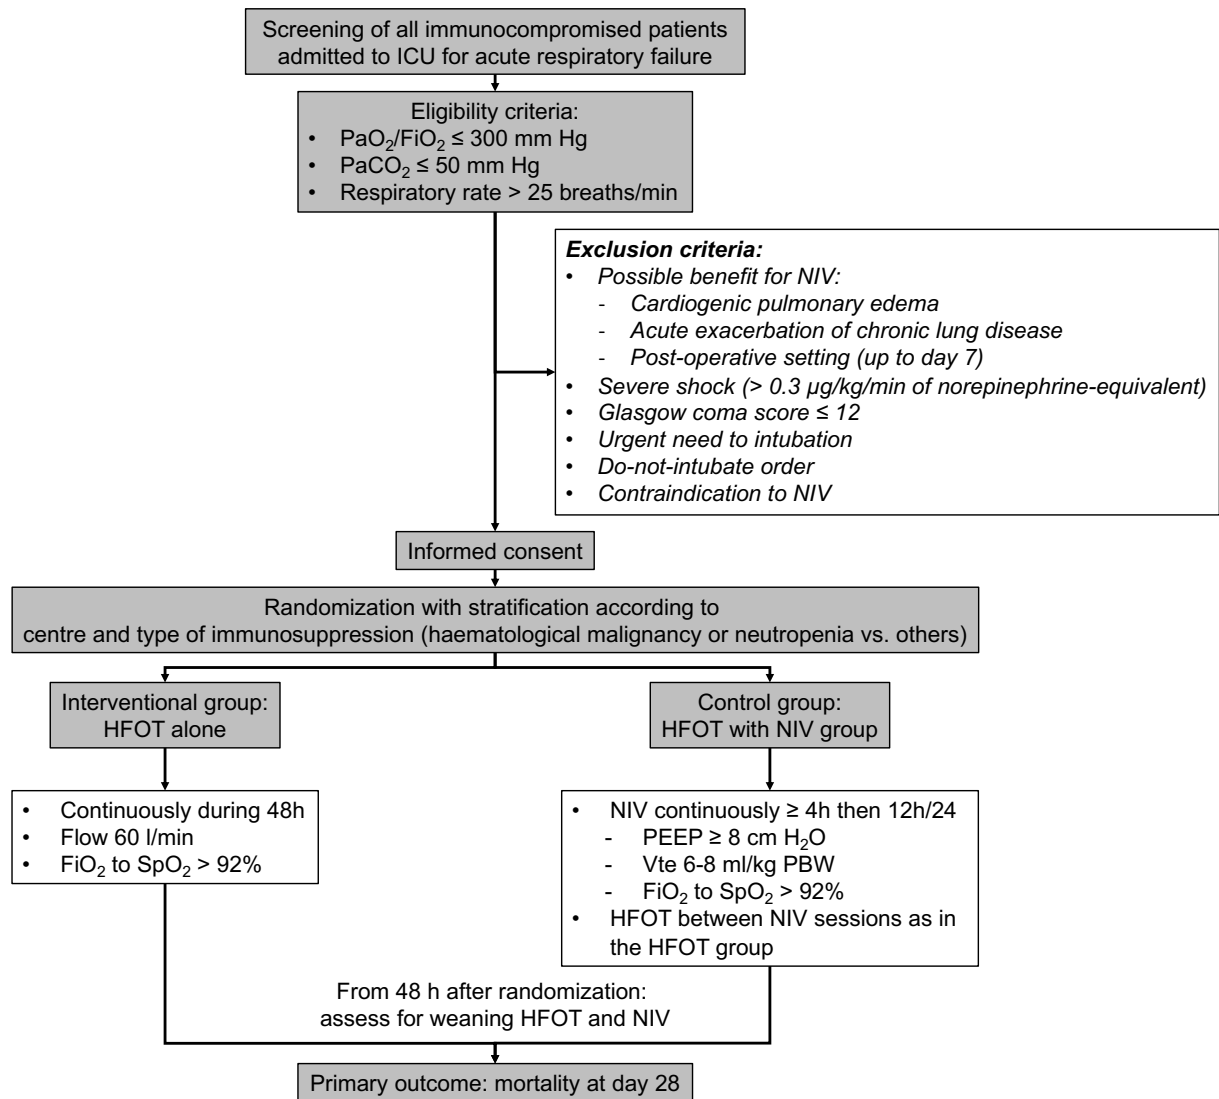

HFOT: high flow nasal cannula oxygen therapy; ICU: intensive care unit; NIV: noninvasive ventilation; PBW: predicted body weight; PEEP: positive end-expiratory pressure; Vte: expired tidal volume

| <b>Actions</b>                                                      | <b>Inclusion<br/>=H0</b> | <b>H1</b> | <b>H6-H12</b> | <b>H24 ± 6</b> | <b>H48 ± 6</b> | <b>H72 ± 6</b> | <b>Intubation</b> | <b>ICU and<br/>hospital<br/>discharge</b> | <b>D28</b> | <b>D90</b> | <b>D180</b> |
|---------------------------------------------------------------------|--------------------------|-----------|---------------|----------------|----------------|----------------|-------------------|-------------------------------------------|------------|------------|-------------|
| <b>Informed consent</b>                                             | X                        |           |               |                |                |                |                   |                                           |            |            |             |
| <b>Inclusion /exclusion criteria</b>                                | X                        |           |               |                |                |                |                   |                                           |            |            |             |
| <b>Randomization and stratification</b> (type of immunosuppression) | X                        |           |               |                |                |                |                   |                                           |            |            |             |
| <b>Clinical characteristics</b>                                     |                          |           |               |                |                |                |                   |                                           |            |            |             |
| Height, weight, body temperature                                    | X                        |           |               |                |                |                |                   |                                           |            |            |             |
| Vital signs                                                         | X                        | X         | X             | X              | X              | X              | X                 |                                           |            |            |             |
| Tolerance (dyspnea and comfort evaluation)                          | X                        | X         | X             | X              | X              | X              | X                 |                                           |            |            |             |
| HFOT or NIV settings                                                | X                        | X         | X             | X              | X              | X              |                   |                                           |            |            |             |
| <b>Supplementary analysis</b>                                       |                          |           |               |                |                |                |                   |                                           |            |            |             |
| Arterial blood gases                                                | X                        | X         | X             | X              | X              | X              | X                 |                                           |            |            |             |
| Chest X-ray                                                         | X                        |           |               |                |                |                | X                 |                                           |            |            |             |
| SOFA score                                                          | X                        |           | X             | X              | X              | X              | X                 |                                           |            |            |             |
| Daily duration of HFOT and NIV                                      |                          |           |               | X              | X              | X              |                   |                                           |            |            |             |
| <b>Status</b> (alive/dead) and cause of death                       |                          |           |               |                |                |                |                   | X                                         |            | X          |             |



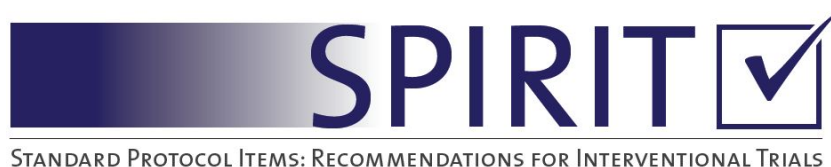

SPIRIT 2013 Checklist: Recommended items to address in a clinical trial protocol and related documents\*

| Page                              | Section/item               | Item No | Description                                                                                                                                                                                                                                                                              |
|-----------------------------------|----------------------------|---------|------------------------------------------------------------------------------------------------------------------------------------------------------------------------------------------------------------------------------------------------------------------------------------------|
| <b>Administrative information</b> |                            |         |                                                                                                                                                                                                                                                                                          |
| 1                                 | Title                      | 1       | Descriptive title identifying the study design, population, interventions, and, if applicable, trial acronym                                                                                                                                                                             |
| 3                                 | Trial registration         | 2a      | Trial identifier and registry name. If not yet registered, name of intended registry                                                                                                                                                                                                     |
| 3                                 |                            | 2b      | All items from the World Health Organization Trial Registration Data Set                                                                                                                                                                                                                 |
| 5                                 | Protocol version           | 3       | Date and version identifier                                                                                                                                                                                                                                                              |
| 26                                | Funding                    | 4       | Sources and types of financial, material, and other support                                                                                                                                                                                                                              |
| 1-4                               | Roles and responsibilities | 5a      | Names, affiliations, and roles of protocol contributors                                                                                                                                                                                                                                  |
| 4                                 |                            | 5b      | Name and contact information for the trial sponsor                                                                                                                                                                                                                                       |
| 4                                 |                            | 5c      | Role of study sponsor and funders, if any, in study design; collection, management, analysis, and interpretation of data; writing of the report; and the decision to submit the report for publication, including whether they will have ultimate authority over any of these activities |
| NA                                |                            | 5d      | Composition, roles, and responsibilities of the coordinating centre, steering committee, endpoint adjudication committee, data management team, and other individuals or groups overseeing the trial, if applicable (see Item 21a for data monitoring committee)                         |
| <b>Introduction</b>               |                            |         |                                                                                                                                                                                                                                                                                          |
| 8                                 | Background and rationale   | 6a      | Description of research question and justification for undertaking the trial, including summary of relevant studies (published and unpublished) examining benefits and harms for each intervention                                                                                       |
| 8                                 |                            | 6b      | Explanation for choice of comparators                                                                                                                                                                                                                                                    |
| 9                                 | Objectives                 | 7       | Specific objectives or hypotheses                                                                                                                                                                                                                                                        |
| 9                                 | Trial design               | 8       | Description of trial design including type of trial (eg, parallel group, crossover, factorial, single group), allocation ratio, and framework (eg, superiority, equivalence, noninferiority, exploratory)                                                                                |

## Methods: Participants, interventions, and outcomes

|       |                      |     |                                                                                                                                                                                                                                                                                                                                                                                |
|-------|----------------------|-----|--------------------------------------------------------------------------------------------------------------------------------------------------------------------------------------------------------------------------------------------------------------------------------------------------------------------------------------------------------------------------------|
| 9     | Study setting        | 9   | Description of study settings (eg, community clinic, academic hospital) and list of countries where data will be collected. Reference to where list of study sites can be obtained                                                                                                                                                                                             |
| 9-10  | Eligibility criteria | 10  | Inclusion and exclusion criteria for participants. If applicable, eligibility criteria for study centres and individuals who will perform the interventions (eg, surgeons, psychotherapists)                                                                                                                                                                                   |
| 10    | Interventions        | 11a | Interventions for each group with sufficient detail to allow replication, including how and when they will be administered                                                                                                                                                                                                                                                     |
| 11-12 |                      | 11b | Criteria for discontinuing or modifying allocated interventions for a given trial participant (eg, drug dose change in response to harms, participant request, or improving/worsening disease)                                                                                                                                                                                 |
| NA    |                      | 11c | Strategies to improve adherence to intervention protocols, and any procedures for monitoring adherence (eg, drug tablet return, laboratory tests)                                                                                                                                                                                                                              |
| 12    |                      | 11d | Relevant concomitant care and interventions that are permitted or prohibited during the trial                                                                                                                                                                                                                                                                                  |
| 12    | Outcomes             | 12  | Primary, secondary, and other outcomes, including the specific measurement variable (eg, systolic blood pressure), analysis metric (eg, change from baseline, final value, time to event), method of aggregation (eg, median, proportion), and time point for each outcome. Explanation of the clinical relevance of chosen efficacy and harm outcomes is strongly recommended |
| 13    | Participant timeline | 13  | Time schedule of enrolment, interventions (including any run-ins and washouts), assessments, and visits for participants. A schematic diagram is highly recommended (see Figure)                                                                                                                                                                                               |
| 12-13 | Sample size          | 14  | Estimated number of participants needed to achieve study objectives and how it was determined, including clinical and statistical assumptions supporting any sample size calculations                                                                                                                                                                                          |
| 13    | Recruitment          | 15  | Strategies for achieving adequate participant enrolment to reach target sample size                                                                                                                                                                                                                                                                                            |

## Methods: Assignment of interventions (for controlled trials)

### Allocation:

|    |                     |     |                                                                                                                                                                                                                                                                                                                                                          |
|----|---------------------|-----|----------------------------------------------------------------------------------------------------------------------------------------------------------------------------------------------------------------------------------------------------------------------------------------------------------------------------------------------------------|
| 14 | Sequence generation | 16a | Method of generating the allocation sequence (eg, computer-generated random numbers), and list of any factors for stratification. To reduce predictability of a random sequence, details of any planned restriction (eg, blocking) should be provided in a separate document that is unavailable to those who enrol participants or assign interventions |
|----|---------------------|-----|----------------------------------------------------------------------------------------------------------------------------------------------------------------------------------------------------------------------------------------------------------------------------------------------------------------------------------------------------------|

|    |    |                                  |     |                                                                                                                                                                                                           |
|----|----|----------------------------------|-----|-----------------------------------------------------------------------------------------------------------------------------------------------------------------------------------------------------------|
| 1  |    |                                  |     |                                                                                                                                                                                                           |
| 2  | 14 | Allocation concealment mechanism | 16b | Mechanism of implementing the allocation sequence (eg, central telephone; sequentially numbered, opaque, sealed envelopes), describing any steps to conceal the sequence until interventions are assigned |
| 3  |    |                                  |     |                                                                                                                                                                                                           |
| 4  |    |                                  |     |                                                                                                                                                                                                           |
| 5  |    |                                  |     |                                                                                                                                                                                                           |
| 6  |    |                                  |     |                                                                                                                                                                                                           |
| 7  | 14 | Implementation                   | 16c | Who will generate the allocation sequence, who will enrol participants, and who will assign participants to interventions                                                                                 |
| 8  |    |                                  |     |                                                                                                                                                                                                           |
| 9  |    |                                  |     |                                                                                                                                                                                                           |
| 10 | 7  | Blinding (masking)               | 17a | Who will be blinded after assignment to interventions (eg, trial participants, care providers, outcome assessors, data analysts), and how                                                                 |
| 11 |    |                                  |     |                                                                                                                                                                                                           |
| 12 |    |                                  |     |                                                                                                                                                                                                           |
| 13 |    |                                  |     |                                                                                                                                                                                                           |
| 14 |    |                                  |     |                                                                                                                                                                                                           |
| 15 | NA |                                  | 17b | If blinded, circumstances under which unblinding is permissible, and procedure for revealing a participant's allocated intervention during the trial                                                      |
| 16 |    |                                  |     |                                                                                                                                                                                                           |
| 17 |    |                                  |     |                                                                                                                                                                                                           |
| 18 |    |                                  |     |                                                                                                                                                                                                           |

### Methods: Data collection, management, and analysis

|    |       |                         |     |                                                                                                                                                                                                                                                                                                                                                                                                              |
|----|-------|-------------------------|-----|--------------------------------------------------------------------------------------------------------------------------------------------------------------------------------------------------------------------------------------------------------------------------------------------------------------------------------------------------------------------------------------------------------------|
| 19 |       |                         |     |                                                                                                                                                                                                                                                                                                                                                                                                              |
| 20 |       |                         |     |                                                                                                                                                                                                                                                                                                                                                                                                              |
| 21 | 14    | Data collection methods | 18a | Plans for assessment and collection of outcome, baseline, and other trial data, including any related processes to promote data quality (eg, duplicate measurements, training of assessors) and a description of study instruments (eg, questionnaires, laboratory tests) along with their reliability and validity, if known. Reference to where data collection forms can be found, if not in the protocol |
| 22 |       |                         |     |                                                                                                                                                                                                                                                                                                                                                                                                              |
| 23 |       |                         |     |                                                                                                                                                                                                                                                                                                                                                                                                              |
| 24 |       |                         |     |                                                                                                                                                                                                                                                                                                                                                                                                              |
| 25 |       |                         |     |                                                                                                                                                                                                                                                                                                                                                                                                              |
| 26 |       |                         |     |                                                                                                                                                                                                                                                                                                                                                                                                              |
| 27 |       |                         |     |                                                                                                                                                                                                                                                                                                                                                                                                              |
| 28 |       |                         |     |                                                                                                                                                                                                                                                                                                                                                                                                              |
| 29 | 14    |                         | 18b | Plans to promote participant retention and complete follow-up, including list of any outcome data to be collected for participants who discontinue or deviate from intervention protocols                                                                                                                                                                                                                    |
| 30 |       |                         |     |                                                                                                                                                                                                                                                                                                                                                                                                              |
| 31 |       |                         |     |                                                                                                                                                                                                                                                                                                                                                                                                              |
| 32 |       |                         |     |                                                                                                                                                                                                                                                                                                                                                                                                              |
| 33 |       |                         |     |                                                                                                                                                                                                                                                                                                                                                                                                              |
| 34 | 16    | Data management         | 19  | Plans for data entry, coding, security, and storage, including any related processes to promote data quality (eg, double data entry; range checks for data values). Reference to where details of data management procedures can be found, if not in the protocol                                                                                                                                            |
| 35 |       |                         |     |                                                                                                                                                                                                                                                                                                                                                                                                              |
| 36 |       |                         |     |                                                                                                                                                                                                                                                                                                                                                                                                              |
| 37 |       |                         |     |                                                                                                                                                                                                                                                                                                                                                                                                              |
| 38 |       |                         |     |                                                                                                                                                                                                                                                                                                                                                                                                              |
| 39 |       |                         |     |                                                                                                                                                                                                                                                                                                                                                                                                              |
| 40 | 15-16 | Statistical methods     | 20a | Statistical methods for analysing primary and secondary outcomes. Reference to where other details of the statistical analysis plan can be found, if not in the protocol                                                                                                                                                                                                                                     |
| 41 |       |                         |     |                                                                                                                                                                                                                                                                                                                                                                                                              |
| 42 |       |                         |     |                                                                                                                                                                                                                                                                                                                                                                                                              |
| 43 |       |                         |     |                                                                                                                                                                                                                                                                                                                                                                                                              |
| 44 | 16    |                         | 20b | Methods for any additional analyses (eg, subgroup and adjusted analyses)                                                                                                                                                                                                                                                                                                                                     |
| 45 |       |                         |     |                                                                                                                                                                                                                                                                                                                                                                                                              |
| 46 |       |                         |     |                                                                                                                                                                                                                                                                                                                                                                                                              |
| 47 | 15    |                         | 20c | Definition of analysis population relating to protocol non-adherence (eg, as randomised analysis), and any statistical methods to handle missing data (eg, multiple imputation)                                                                                                                                                                                                                              |
| 48 |       |                         |     |                                                                                                                                                                                                                                                                                                                                                                                                              |
| 49 |       |                         |     |                                                                                                                                                                                                                                                                                                                                                                                                              |
| 50 |       |                         |     |                                                                                                                                                                                                                                                                                                                                                                                                              |
| 51 |       |                         |     |                                                                                                                                                                                                                                                                                                                                                                                                              |

### Methods: Monitoring

|    |    |                 |     |                                                                                                                                                                                                                                                                                                                                       |
|----|----|-----------------|-----|---------------------------------------------------------------------------------------------------------------------------------------------------------------------------------------------------------------------------------------------------------------------------------------------------------------------------------------|
| 52 |    |                 |     |                                                                                                                                                                                                                                                                                                                                       |
| 53 |    |                 |     |                                                                                                                                                                                                                                                                                                                                       |
| 54 | 16 | Data monitoring | 21a | Composition of data monitoring committee (DMC); summary of its role and reporting structure; statement of whether it is independent from the sponsor and competing interests; and reference to where further details about its charter can be found, if not in the protocol. Alternatively, an explanation of why a DMC is not needed |
| 55 |    |                 |     |                                                                                                                                                                                                                                                                                                                                       |
| 56 |    |                 |     |                                                                                                                                                                                                                                                                                                                                       |
| 57 |    |                 |     |                                                                                                                                                                                                                                                                                                                                       |
| 58 |    |                 |     |                                                                                                                                                                                                                                                                                                                                       |
| 59 |    |                 |     |                                                                                                                                                                                                                                                                                                                                       |
| 60 |    |                 |     |                                                                                                                                                                                                                                                                                                                                       |

|    |    |          |     |                                                                                                                                                                                   |
|----|----|----------|-----|-----------------------------------------------------------------------------------------------------------------------------------------------------------------------------------|
| 1  |    |          |     |                                                                                                                                                                                   |
| 2  | NA |          | 21b | Description of any interim analyses and stopping guidelines, including who will have access to these interim results and make the final decision to terminate the trial           |
| 3  |    |          |     |                                                                                                                                                                                   |
| 4  |    |          |     |                                                                                                                                                                                   |
| 5  |    |          |     |                                                                                                                                                                                   |
| 6  | 16 | Harms    | 22  | Plans for collecting, assessing, reporting, and managing solicited and spontaneously reported adverse events and other unintended effects of trial interventions or trial conduct |
| 7  |    |          |     |                                                                                                                                                                                   |
| 8  |    |          |     |                                                                                                                                                                                   |
| 9  |    |          |     |                                                                                                                                                                                   |
| 10 | 16 | Auditing | 23  | Frequency and procedures for auditing trial conduct, if any, and whether the process will be independent from investigators and the sponsor                                       |
| 11 |    |          |     |                                                                                                                                                                                   |
| 12 |    |          |     |                                                                                                                                                                                   |
| 13 |    |          |     |                                                                                                                                                                                   |
| 14 |    |          |     |                                                                                                                                                                                   |

### Ethics and dissemination

|    |    |                               |     |                                                                                                                                                                                                                                                                                     |
|----|----|-------------------------------|-----|-------------------------------------------------------------------------------------------------------------------------------------------------------------------------------------------------------------------------------------------------------------------------------------|
| 15 |    |                               |     |                                                                                                                                                                                                                                                                                     |
| 16 |    |                               |     |                                                                                                                                                                                                                                                                                     |
| 17 | 5  | Research ethics approval      | 24  | Plans for seeking research ethics committee/institutional review board (REC/IRB) approval                                                                                                                                                                                           |
| 18 |    |                               |     |                                                                                                                                                                                                                                                                                     |
| 19 |    |                               |     |                                                                                                                                                                                                                                                                                     |
| 20 | 17 | Protocol amendments           | 25  | Plans for communicating important protocol modifications (eg, changes to eligibility criteria, outcomes, analyses) to relevant parties (eg, investigators, REC/IRBs, trial participants, trial registries, journals, regulators)                                                    |
| 21 |    |                               |     |                                                                                                                                                                                                                                                                                     |
| 22 |    |                               |     |                                                                                                                                                                                                                                                                                     |
| 23 |    |                               |     |                                                                                                                                                                                                                                                                                     |
| 24 |    |                               |     |                                                                                                                                                                                                                                                                                     |
| 25 |    |                               |     |                                                                                                                                                                                                                                                                                     |
| 26 | 16 | Consent or assent             | 26a | Who will obtain informed consent or assent from potential trial participants or authorised surrogates, and how (see Item 32)                                                                                                                                                        |
| 27 |    |                               |     |                                                                                                                                                                                                                                                                                     |
| 28 |    |                               |     |                                                                                                                                                                                                                                                                                     |
| 29 | NA |                               | 26b | Additional consent provisions for collection and use of participant data and biological specimens in ancillary studies, if applicable                                                                                                                                               |
| 30 |    |                               |     |                                                                                                                                                                                                                                                                                     |
| 31 |    |                               |     |                                                                                                                                                                                                                                                                                     |
| 32 | 17 | Confidentiality               | 27  | How personal information about potential and enrolled participants will be collected, shared, and maintained in order to protect confidentiality before, during, and after the trial                                                                                                |
| 33 |    |                               |     |                                                                                                                                                                                                                                                                                     |
| 34 |    |                               |     |                                                                                                                                                                                                                                                                                     |
| 35 |    |                               |     |                                                                                                                                                                                                                                                                                     |
| 36 |    |                               |     |                                                                                                                                                                                                                                                                                     |
| 37 | 17 | Declaration of interests      | 28  | Financial and other competing interests for principal investigators for the overall trial and each study site                                                                                                                                                                       |
| 38 |    |                               |     |                                                                                                                                                                                                                                                                                     |
| 39 |    |                               |     |                                                                                                                                                                                                                                                                                     |
| 40 | 17 | Access to data                | 29  | Statement of who will have access to the final trial dataset, and disclosure of contractual agreements that limit such access for investigators                                                                                                                                     |
| 41 |    |                               |     |                                                                                                                                                                                                                                                                                     |
| 42 |    |                               |     |                                                                                                                                                                                                                                                                                     |
| 43 |    |                               |     |                                                                                                                                                                                                                                                                                     |
| 44 | NA | Ancillary and post-trial care | 30  | Provisions, if any, for ancillary and post-trial care, and for compensation to those who suffer harm from trial participation                                                                                                                                                       |
| 45 |    |                               |     |                                                                                                                                                                                                                                                                                     |
| 46 |    |                               |     |                                                                                                                                                                                                                                                                                     |
| 47 |    |                               |     |                                                                                                                                                                                                                                                                                     |
| 48 | 17 | Dissemination policy          | 31a | Plans for investigators and sponsor to communicate trial results to participants, healthcare professionals, the public, and other relevant groups (eg, via publication, reporting in results databases, or other data sharing arrangements), including any publication restrictions |
| 49 |    |                               |     |                                                                                                                                                                                                                                                                                     |
| 50 |    |                               |     |                                                                                                                                                                                                                                                                                     |
| 51 |    |                               |     |                                                                                                                                                                                                                                                                                     |
| 52 |    |                               |     |                                                                                                                                                                                                                                                                                     |
| 53 | 26 |                               | 31b | Authorship eligibility guidelines and any intended use of professional writers                                                                                                                                                                                                      |
| 54 |    |                               |     |                                                                                                                                                                                                                                                                                     |
| 55 |    |                               |     |                                                                                                                                                                                                                                                                                     |
| 56 |    |                               |     |                                                                                                                                                                                                                                                                                     |
| 57 | NA |                               | 31c | Plans, if any, for granting public access to the full protocol, participant-level dataset, and statistical code                                                                                                                                                                     |
| 58 |    |                               |     |                                                                                                                                                                                                                                                                                     |
| 59 |    |                               |     |                                                                                                                                                                                                                                                                                     |
| 60 |    |                               |     |                                                                                                                                                                                                                                                                                     |

## Appendices

|     |                            |    |                                                                                                                                                                                                |
|-----|----------------------------|----|------------------------------------------------------------------------------------------------------------------------------------------------------------------------------------------------|
| App | Informed consent materials | 32 | Model consent form and other related documentation given to participants and authorised surrogates                                                                                             |
| NA  | Biological specimens       | 33 | Plans for collection, laboratory evaluation, and storage of biological specimens for genetic or molecular analysis in the current trial and for future use in ancillary studies, if applicable |

\*It is strongly recommended that this checklist be read in conjunction with the SPIRIT 2013 Explanation & Elaboration for important clarification on the items. Amendments to the protocol should be tracked and dated. The SPIRIT checklist is copyrighted by the SPIRIT Group under the Creative Commons "[Attribution-NonCommercial-NoDerivs 3.0 Unported](https://creativecommons.org/licenses/by-nc-nd/3.0/)" license.

For peer review only

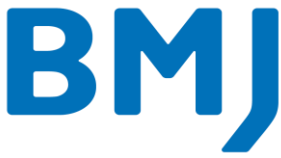

## Parties

In this document references to “BMJ”, “We” and “Us” are to **BMJ Publishing Group Limited** (a company incorporated in England with company number, 3102371 whose registered office is BMA House, Tavistock Square, London WC1H 9JR); and references to “You” are to the Submitting Author.

### 1. Definitions

1.1. The following definitions and rules of interpretation apply in this licence:

|                                             |                                                                                                                                                                                                                                                                                                                                                                                                                                                                                                                                                                                                                                                                                                                                                                                                                                                                                                                                                          |
|---------------------------------------------|----------------------------------------------------------------------------------------------------------------------------------------------------------------------------------------------------------------------------------------------------------------------------------------------------------------------------------------------------------------------------------------------------------------------------------------------------------------------------------------------------------------------------------------------------------------------------------------------------------------------------------------------------------------------------------------------------------------------------------------------------------------------------------------------------------------------------------------------------------------------------------------------------------------------------------------------------------|
| <b>Authors:</b>                             | the Submitting Author and any co-authors. Author shall mean any one of the Submitting Author or any co-author.                                                                                                                                                                                                                                                                                                                                                                                                                                                                                                                                                                                                                                                                                                                                                                                                                                           |
| <b>Author’s Accepted Manuscript</b>         | the final draft version of the Work, which has been accepted for publication in the Journal & peer reviewed but not copyedited, typeset or published.                                                                                                                                                                                                                                                                                                                                                                                                                                                                                                                                                                                                                                                                                                                                                                                                    |
| <b>Author’s Original Version (Preprint)</b> | the pre review version of the Work that is submitted to the Journal or any earlier draft, which has not been peer reviewed.                                                                                                                                                                                                                                                                                                                                                                                                                                                                                                                                                                                                                                                                                                                                                                                                                              |
| <b>Commercial Use</b>                       | any use of any part of the Work for i) any commercial gain without the Agreement of BMJ, including without limitation, charging fees for delivery or access to the Work (whether on a standalone basis or included within any work), associating advertising to the Work or providing hosting services to other repositories or to other organisations (including where an otherwise non commercial site or repository provides a service to other organisations or agencies); or ii) to substitute the services provided by BMJ in relation to Work or the Journal the Work may be included within. This may include systematic distribution or articles by any means (such as print, email, posting, indexing or linking) and/or any use for promotional or marketing activities by commercial companies including for use by their customers or intended audiences (for example by pharmaceutical companies to healthcare professionals or patients). |
| <b>Intellectual Property Rights:</b>        | all copyright and related rights, trademarks, service marks, trade, business and domain names, rights in goodwill or to sue for passing off, database right, rights in confidential information (including know-how and trade secrets) and any other intellectual property rights, in each case whether registered or unregistered and all similar or equivalent rights or forms of protection in any part of the world.                                                                                                                                                                                                                                                                                                                                                                                                                                                                                                                                 |
| <b>Journal:</b>                             | a journal published by BMJ.                                                                                                                                                                                                                                                                                                                                                                                                                                                                                                                                                                                                                                                                                                                                                                                                                                                                                                                              |
| <b>Open Access Article(s):</b>              | a Version of Record which in accordance with BMJ’s written policies (which may involve a requirement to pay an article publishing charge) is agreed with the Authors to be made available to access without charge, which may be re-used by third parties in accordance with clause 8.                                                                                                                                                                                                                                                                                                                                                                                                                                                                                                                                                                                                                                                                   |
| <b>Submitting Author:</b>                   | the author who submits the Work to BMJ for publication in the Journal.                                                                                                                                                                                                                                                                                                                                                                                                                                                                                                                                                                                                                                                                                                                                                                                                                                                                                   |
| <b>Version of Record:</b>                   | the version of the Work published by BMJ in the Journal.                                                                                                                                                                                                                                                                                                                                                                                                                                                                                                                                                                                                                                                                                                                                                                                                                                                                                                 |
| <b>Work:</b>                                | the work You have submitted for publication in the Journal. Work shall include all text, audio, video and audio-visual material, abstracts, databases, tables, data, diagrams, photographs and other images or illustrative material and including all drafts of the Work, the version of the Work accepted for publication by BMJ and the Version of Record.                                                                                                                                                                                                                                                                                                                                                                                                                                                                                                                                                                                            |

1.2. Unless the context otherwise requires, words in the singular include the plural and in the plural include the singular.

1.3. Headings are for convenience only and do not affect the interpretation of this licence.

1.4. Any words following the term including or any similar expression shall be construed as illustrative only and shall not

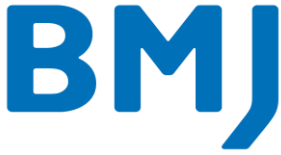

limit the sense of the words preceding it.

1.5. A reference to a statute is a reference to such statute as amended.

## 2. Licence and publication of the Work

2.1. In consideration for BMJ evaluating whether to publish the Work, You grant a worldwide, irrevocable, royalty free, licence to BMJ (and, where the Journal is co-owned by BMJ to the co-owners of the Journal) in perpetuity to:

- 2.1.1. edit, adapt, publish, distribute, display, reproduce, translate and store the Work (and any derivative works based on the Work created under this licence) in all media and on all distribution platforms including social media platforms, whether now known or in the future developed or discovered, and whether as part of BMJ's products and services or as part of other content owned, controlled or represented by BMJ;
- 2.1.2. include the Work in collections of other work and create summaries, extracts, abstracts and other derivative works based in whole or in part on the Work;
- 2.1.3. convert the Work into any format, including audio;
- 2.1.4. exploit all subsidiary rights that exist or may exist in the future in the Work including in relation to metadata;
- 2.1.5. include electronic links from the Work to any third party material; and
- 2.1.6. licence third parties to do any or all of the above.

2.2. We will make every effort to consult with You or another Author if substantial changes are made. You acknowledge and agree that BMJ may in its sole discretion publish any versions of the Work submitted to BMJ by You and any peer reviews of the Work and responses from You, or another Author and third parties relating to the Work.

2.3. You hereby authorise BMJ to take such steps as BMJ considers necessary to prevent infringement of Intellectual Property Rights in the Work or infringement of rights granted to BMJ by You under this licence without recourse to You.

2.4. You agree that BMJ may retract the Version of Record or publish a correction or other notice in connection with the Version of Record at any time and without further recourse to You.

2.5. In the case of Work that has been submitted for publication as an Open Access Article only, BMJ will submit the Version of Record and any expression of concern or retraction or other notices to PubMed Central ("PMC") and its mirror sites promptly after publication by BMJ. For all other Works, where the funding body for that Work is identified as a funder here: <http://www.sherpa.ac.uk/juliet/index.php> ("Sherpa Funder") and that funder requires deposit to PMC and its mirror sites, the Author or its funding body may deposit a copy of the Author's Accepted Manuscript (but not the Version of Record) in PMC and its mirror sites (and which must include any expression of concern, retraction or other notices) after an embargo period of 12 (twelve) months from the publication date of the Version of Record or earlier if required by the Sherpa Funder.

## 3. Ownership of rights in the Work

3.1. All Intellectual Property Rights in the Work remain with the Authors (or their employers as the case may be) and each Author shall be permitted to make such use of the Work as it set out in clause 6.

3.2. The licence granted to BMJ in clause 2 is an exclusive licence other than: i) where the Work is created in whole or part by UK Crown employees whose work is subject to Crown copyright and their contribution to the Work cannot be licensed on an exclusive basis, ("UK Crown Employees"); ii) BMJ has agreed in accordance with clause 8.2 that CC-BY shall apply; or iii) where the Work is created in whole or part by US Federal Government officers or employees as part of their official duties. In those circumstances, the following applies:

- 3.2.1. The Work (or any part of the Work) created by UK Crown Employees is licensed to BMJ on the same terms as set out in clause 2 save that the licence in respect of their part of the Work shall be nonexclusive;
- 3.2.2. The Work is subject to clause 8.2 herein and therefore it is agreed that CC-BY shall apply. In such cases the Work is licensed to BMJ on the same terms as set out in clause 2 save that the licence shall be nonexclusive;
- 3.2.3. No licence is required from the Author to publish the elements of the Work created by US Federal Government officers or employees, as part of their official duties, however new international Intellectual Property Rights may apply to the Work, and therefore the terms of this Agreement shall continue to apply, other than where they are inconsistent with law.

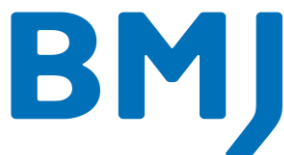

#### 4. Warranties

##### 4.1. You warrant that:

- 4.1.1. You are authorised to enter into this Agreement on behalf of all Authors, including without limitation, to grant all rights and adhere to all obligations;
- 4.1.2. the Work comprises the original work of the Authors and has not been copied (in whole or in part) from any other work or material, or any other source;
- 4.1.3. no person other than the Authors named on the Work has been involved in the creation of the Work;
- 4.1.4. if the Work (or any part of the Work) has been created in the course of employment You have all necessary written releases required to enter into this licence from any employer;
- 4.1.5. other than as expressly permitted in clause 6 herein, the Work has not previously been published (in whole or in part) and (save in the case of US Federal Government officers or employees) You are the sole, unencumbered absolute legal and beneficial owner(s) of all Intellectual Property Rights in the Work (or You have obtained the necessary assignments or licences required for publication under this licence);
- 4.1.6. the Work does not infringe the Intellectual Property Rights, moral rights or any other right of any third party;
- 4.1.7. written consent has been obtained from patients if any part of the Work includes patient data (whether or not anonymised) and such written patient consent shall be provided to Us immediately if We request it;
- 4.1.8. to the best of Your knowledge:
  - a) the Work does not contain material that is obscene blasphemous, libellous, obtained directly or indirectly in breach of confidence or is otherwise objectionable;
  - b) all statements of fact in the Work are true and correct and no advice, formula, or instruction in the Work will, if followed or implemented by any person, cause loss, damage or injury to them or any other person;
- 4.1.9. You will not make any use of the Work other than as permitted under fair dealing provisions of the Copyright Design and Patents Act 1988 or as set out in this licence, without Our prior written consent;
- 4.1.10. declarations of competing interests submitted by the Authors are and shall remain accurate and You will notify Us in writing of any changes to such competing interests immediately; and
- 4.1.11. all information supplied to Us shall be accurate.

**5. Bribery and corruption.** You agree to comply with all applicable laws relating to anti-bribery and corruption including the Bribery Act 2010 and to comply with BMJ's anti-bribery policy (published on the website [bmj.com](http://bmj.com)). You must notify Us immediately if You become aware of, or have grounds for suspecting, fraud or malpractice in connection with the Work. For the purposes of this clause malpractice includes giving or receiving any financial or other advantage that may be construed as a bribe under the Bribery Act 2010 or any other applicable law).

#### 6. Permitted uses by owners of the Work

- 6.1. Any Author may make the following uses of the Work under this Agreement provided such uses are not a Commercial Use. Each Author shall be entitled to:
  - 6.1.1. reproduce a reasonable number (no more than 100) print copies of the Version of Record for personal use;
  - 6.1.2. send an individual copy of the Version of Record to colleagues within their institution and/or department, collaborators on any project they are working on, and anyone who directly requests a copy from them, in print or electronic form provided that there is no automatic distribution, only a single copy is supplied to each to any of the aforementioned recipients, they make the recipient know their use must be personal and not a Commercial Use, that the Author ensures no fee is charged and may not distribute any copies on a systematic basis including by mass e-mailings;
  - 6.1.3. include the Version of Record in a compilation of material for educational use in the Authors' institutions provided these are distributed free of charge to students, or are stored in digital format in data rooms for access by students as part of their course work, or distributed for in house training programmes at the



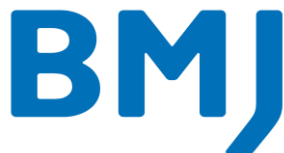

Authors' institutions, or are distributed at seminars or conferences subject to a limit of 100 copies for each conference or seminar;

6.1.4. place the Author's Accepted Manuscript (but not the Version of Record unless the Work is agreed with BMJ to be an Open Access Article in which case it can be the Version of Record) and the published abstract of the Version of Record on:

- i) that Author's own or institution's website (which must be non commercial); and/or
- ii) Your institution's repository (and such an institution must be academic or scholarly);

6.1.5. place the Author's Accepted Manuscript (but not the Version of Record unless the Work is agreed with BMJ to be an Open Access Article in which case it can be the Version of Record) in a Scholarly Collaboration Network ("SCN") which has signed up to the STM article sharing principles here: <http://www.stm-assoc.org/stm-consultations/scn-consultation-2015/> ("Compliant SCN's"), after an embargo period of 12 (twelve) months from the publication date of the Version of Record (and no embargo for Open Access Articles);

6.1.6. use a maximum of two figures (including tables) from the Work (unless separate copyright is held by a third party and in which case permission must be sought from the holder for any use), and selected text extracts of less than 100 words or series of text extracts totally less than 300 words for quotation and use such excerpts in all media and future editions as long as the purpose of the use is scholarly comment, non commercial research or education use and full credit is given to the Authors and Us in accordance with normal scholarly practice and any quotations or excerpts are unmodified;

6.1.7. in the case of Open Access Articles only, publish the Version of Record in any media after publication by BMJ strictly for non Commercial Use and free of charge or other consideration including depositing the Work in any repository of academic work; and

6.1.8. make any permitted uses of the Author's Original Version (Preprint), Author's Accepted Manuscript and Version of Record (which may predate rights granted in this licence) as defined and set out in the BMJ Author's Self Archiving Policies stated on the BMJ's website from time to time.

6.2. Unless otherwise stated herein, the Authors may not make any Commercial Use of any part of the Work.

6.3. An Author is permitted under this Agreement to include all or part of the Version of Record in a publication (including a book, essay, or position paper) that is not peer reviewed, which is authored or edited by You, provided that such use is not permitted where multiple works will be included in a single publication. BMJ acknowledges that such a use may be Commercial Use.

6.4. The Authors agree to publish or to procure publication of the following statements on the Work each time it is reused in accordance with clause 6.1 above:

6.4.1. In all cases of reuse, should a retraction, expression of concern, or significant correction be applied to the Version of Record by BMJ, the permitted reused version (in accordance with Clause 6.1) must state this and link clearly to the published notice.

6.4.2. for Open Access Articles:

6.4.2.1 where the Version of Record is republished on Your website, Your employer's website, or the website of any third party authorised by You under this licence:

*"This article has been accepted for publication in [insert full citation including Journal, Volume and Issue] following peer review and can also be accessed online at [insert full DOI eg. <http://dx.doi.org/10.1136/xxxxx> ]."*

6.4.2.2 where any translations of the Work are permitted under any Creative Commons licence, must include the following statement:

*"This is an unofficial translation of an article that appears in a BMJ publication. Neither BMJ nor its licensors has not endorsed this translation."*

6.4.3. for all other articles:

6.4.3.1 where the Author's Accepted Manuscript of the Work has been republished in accordance with Clauses 2.5, 6.1.4 and/or 6.1.5:

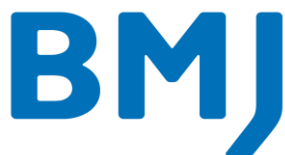

- 1  
2  
3  
4  
5  
6  
7  
8  
9  
10  
11  
12  
13  
14  
15  
16  
17  
18  
19  
20  
21  
22  
23  
24  
25  
26  
27  
28  
29  
30  
31  
32  
33  
34  
35  
36  
37  
38  
39  
40  
41  
42  
43  
44  
45  
46  
47  
48  
49  
50  
51  
52  
53  
54  
55  
56  
57  
58  
59  
60
- i) *“This article has been accepted for publication in [insert full citation including Journal, Volume and Issue] following peer review, and the Version of Record of this article can be accessed online at [insert full DOI eg. <http://dx.doi.org/10.1136/xxxxx>].” and*
- ii) *“© Authors (or their employer(s)) <year>” [Add where a funder mandates: “Reuse of this manuscript version (excluding any databases, tables, diagrams, photographs and other images or illustrative material included where a another copyright owner is identified) is permitted strictly pursuant to the terms of the Creative Commons Attribution-Non Commercial 4.0 International ([CC-BY-NC 4.0](https://creativecommons.org/licenses/by-nc/4.0/)) <https://creativecommons.org/licenses/by-nc/4.0/>” and*
- 6.4.3.2 where any translations of the Work are permitted pursuant to the terms of the CC-BY-NC-4.0 license, these must include the following statement:
- “This is an unofficial translation of a manuscript accepted for publication by BMJ. Neither BMJ nor its licensors has not endorsed this translation.”*
- 6.5. BMJ requires that all reuse of the Work (other than an exact republication of the Version of Record- where permitted) must remove any BMJ trade marks (and co-owner trademarks-*if applicable*) (whether registered or unregistered).
- 6.6. All rights not expressly granted to the Authors under this Agreement are reserved to BMJ.
- 7. Reversion of Rights.** If BMJ does not publish the Work within 12 months of accepting it for publication, the rights granted in this Agreement shall revert to the copyright owners.
- 8. Open Access Articles**
- 8.1. Subject to clause 8.2, in relation to Open Access Articles, the Work may be reused under the terms of the Creative Commons Attribution-Non Commercial 4.0 International licence (CC BY-NC 4.0) or any subsequent versions of this licence as determined by BMJ.
- 8.2. Where research on which an Open Access Article is based is funded by the Wellcome Trust, UK Research and Innovation , NIH, or any other funder that mandates the use of CC-BY licence, or BMJ has expressly agreed that the CC-BY licence shall apply, the Work may be re-used under the terms of the Creative Commons Attribution 4.0 International Licence (CC BY 4.0) or any subsequent versions of this licence as determined by BMJ.
- 8.3. The Submitting Author is required to advise BMJ before publication whether the funding source is one of the bodies referred to in clause 8.2 and will be provided at the point of submission of the Work for publication.
- 9. Law and jurisdiction.** This Agreement its subject matter and formation, are governed by English law and the courts of England shall have -exclusive jurisdiction to settle any dispute arising in connection with it.
- 10. General**
- 10.1. This Agreement shall be binding on, and enure to the benefit of, the Authors and BMJ and their respective personal representatives, successors and permitted assigns, and references to any party shall include that party's personal representatives, successors and permitted assigns.
- 10.2. To the fullest extent permitted by law, We accept no liability to You in connection with the Work.
- 10.3. Each of the provisions set out in this Agreement operates separately. If any court or competent authority decides that any provision is unlawful or unenforceable, the remaining conditions will remain in full force and effect.
- 10.4. This Agreement including all information supplied to Us, howsoever relating to the Work, constitutes the whole agreement (the legally binding contract) between the Authors and Us relating to the Work and supersedes all prior arrangements (including any previous author licences You may have entered into) or understandings whether written or oral.
- 11. Permissions.** Permission must be sought from BMJ for all uses not expressly set out as permitted uses under this licence. Please email: [bmj.permissions@bmj.com](mailto:bmj.permissions@bmj.com).

# BMJ Open

## High-flow nasal oxygen therapy alone or with noninvasive ventilation in immunocompromised patients admitted to ICU for acute hypoxemic respiratory failure: the randomised multicentre controlled FLORALI-IM protocol

|                               |                                                                                                                                                                                                                                                                                                                                                                                                                                                                                                                                                                                                                                                                                                                                                                                                                                                                                                                                                                                                                                                                                                                                                                                                                                                                                                                                                                                                                                                                                                                                                                                                                                                                                                                                                                                                                                                                                                                                                                                                                                                                                                                                                                                                                                                                                                                                                  |
|-------------------------------|--------------------------------------------------------------------------------------------------------------------------------------------------------------------------------------------------------------------------------------------------------------------------------------------------------------------------------------------------------------------------------------------------------------------------------------------------------------------------------------------------------------------------------------------------------------------------------------------------------------------------------------------------------------------------------------------------------------------------------------------------------------------------------------------------------------------------------------------------------------------------------------------------------------------------------------------------------------------------------------------------------------------------------------------------------------------------------------------------------------------------------------------------------------------------------------------------------------------------------------------------------------------------------------------------------------------------------------------------------------------------------------------------------------------------------------------------------------------------------------------------------------------------------------------------------------------------------------------------------------------------------------------------------------------------------------------------------------------------------------------------------------------------------------------------------------------------------------------------------------------------------------------------------------------------------------------------------------------------------------------------------------------------------------------------------------------------------------------------------------------------------------------------------------------------------------------------------------------------------------------------------------------------------------------------------------------------------------------------|
| Journal:                      | <i>BMJ Open</i>                                                                                                                                                                                                                                                                                                                                                                                                                                                                                                                                                                                                                                                                                                                                                                                                                                                                                                                                                                                                                                                                                                                                                                                                                                                                                                                                                                                                                                                                                                                                                                                                                                                                                                                                                                                                                                                                                                                                                                                                                                                                                                                                                                                                                                                                                                                                  |
| Manuscript ID                 | bmjopen-2019-029798.R1                                                                                                                                                                                                                                                                                                                                                                                                                                                                                                                                                                                                                                                                                                                                                                                                                                                                                                                                                                                                                                                                                                                                                                                                                                                                                                                                                                                                                                                                                                                                                                                                                                                                                                                                                                                                                                                                                                                                                                                                                                                                                                                                                                                                                                                                                                                           |
| Article Type:                 | Protocol                                                                                                                                                                                                                                                                                                                                                                                                                                                                                                                                                                                                                                                                                                                                                                                                                                                                                                                                                                                                                                                                                                                                                                                                                                                                                                                                                                                                                                                                                                                                                                                                                                                                                                                                                                                                                                                                                                                                                                                                                                                                                                                                                                                                                                                                                                                                         |
| Date Submitted by the Author: | 17-Apr-2019                                                                                                                                                                                                                                                                                                                                                                                                                                                                                                                                                                                                                                                                                                                                                                                                                                                                                                                                                                                                                                                                                                                                                                                                                                                                                                                                                                                                                                                                                                                                                                                                                                                                                                                                                                                                                                                                                                                                                                                                                                                                                                                                                                                                                                                                                                                                      |
| Complete List of Authors:     | <p>Coudroy, Rémi; CHU de Poitiers, Médecine Intensive et Réanimation ; INSERM CIC 1402, groupe ALIVE, Université de Poitiers<br/> Frat, Jean-Pierre; CHU de Poitiers, Médecine Intensive et Réanimation ; INSERM CIC 1402, groupe ALIVE, Université de Poitiers<br/> Ehrmann, Stephan; CHU de Tours, Médecine Intensive Réanimation; CIC 1415, CRICS-TriggerSEP, Centre d'étude des pathologies respiratoires, INSERM U1100, Université de Tours<br/> Pène, Frédéric; Hôpital Cochin, Médecine intensive &amp; Réanimation; Université Paris Descartes<br/> Terzi, Nicolas ; CHU Grenoble Alpes, Médecine Intensive Réanimation; INSERM, Université Grenoble-Alpes, U1042, HP2<br/> Decavèle, Maxens; Groupe Hospitalier Pitié-Salpêtrière Charles Foix, Service de Pneumologie, Médecine Intensive et Réanimation, Département R3S, AP-HP ; INSERM, UMRS1158 Neurophysiologie Respiratoire Expérimentale et Clinique, Sorbonne Université<br/> Prat, Gwenaël; CHU de Brest, Médecine Intensive et Réanimation<br/> Garret, Charlotte; CHU de Nantes, Médecine Intensive Réanimation<br/> Contou, Damien; Centre Hospitalier Victor Dupouy, Service de Réanimation Polyvalente<br/> Bourenne, Jeremy; CHU La Timone 2, Médecine Intensive Réanimation, Réanimation des Urgences, Aix-Marseille Université,<br/> Gacouin, Arnaud; CHU de Rennes, Hôpital Ponchaillou, Service des Maladies Infectieuses et Réanimation Médicale<br/> Girault, C; Hôpital Charles Nicolle, CHU de Rouen, Service de Réanimation Médicale; Normandie Univ, Unirouen, UPRES EA-3830<br/> Dellamonica, Jean ; CHU de Nice, Médecine Intensive Réanimation<br/> Malacrino, Dominique ; Centre hospitalier de Béthune, Service de Réanimation<br/> Labro, Guylaine; Hôpital Jean Minjoz, Medical Intensive Care Unit; Research Center EA3920, University of Franche-Comté<br/> Quenot, Jean-Pierre; CHU Dijon, Service de Médecine Intensive-Réanimation; INSERM U1231, Equipe Lipness, Université Bourgogne-Franche-Comté; UMR1231 Lipides, Nutrition, Cancer, équipe Lipness, LipSTIC LabEx, Fondation de coopération scientifique Bourgogne-Franche-Comté; INSERM, CIC 1432, Module Epidémiologie Clinique; Centre d'Investigation Clinique, Module Epidémiologie Clinique/Essais Cliniques<br/> Herbland, Alexandre; Centre hospitalier Saint Louis, Service de</p> |

|                                 |                                                                                                                                                                                                                                                                                                                                                                                                                                                                                                                                                                                                                                                                                                                                                                                                                                                                                                                                                                                                                                                                                                                                                                                                                                                                                                                                                                                                                                                                                                                                                                                                                                                                    |
|---------------------------------|--------------------------------------------------------------------------------------------------------------------------------------------------------------------------------------------------------------------------------------------------------------------------------------------------------------------------------------------------------------------------------------------------------------------------------------------------------------------------------------------------------------------------------------------------------------------------------------------------------------------------------------------------------------------------------------------------------------------------------------------------------------------------------------------------------------------------------------------------------------------------------------------------------------------------------------------------------------------------------------------------------------------------------------------------------------------------------------------------------------------------------------------------------------------------------------------------------------------------------------------------------------------------------------------------------------------------------------------------------------------------------------------------------------------------------------------------------------------------------------------------------------------------------------------------------------------------------------------------------------------------------------------------------------------|
|                                 | <p>Réanimation<br/> Jochmans, Sébastien; Centre hospitalier Sud-Ile-de France, Service de réanimation<br/> Devaquet, Jérôme; Hôpital Foch, Medical-Surgical Intensive Care Unit<br/> Benzekri, Dalila; Groupe Hospitalier Régional d'Orléans, Médecine Intensive Réanimation<br/> Vivier, Emmanuel; Hôpital Saint Joseph Saint Luc, Reanimation Polyvalente<br/> Nseir, Saad; CHU de Lille, Centre de Réanimation, Université de Lille<br/> Colin, Gwenhaël ; Centre Hospitalier Départemental de Vendée, Service de Médecine Intensive et Réanimation<br/> Thévenin, Didier; CH de Lens, Service de Réanimation Polyvalente<br/> Grasselli, Giacomo; Fondazione IRCCS Ca' Granda Ospedale Maggiore Policlinico, Department of Anesthesiology, Intensive Care and Emergency, Department of Pathophysiology and Transplantation<br/> Assefi, Mona; Department of Anesthesia and Critical Care Medicine, Multidisciplinary Intensive Care Unit, University Pierre and Marie Curie (UPMC)<br/> Guerin, Claude; Hôpital de La Croix-Rousse, Hospices civils de Lyon, Service de Médecine Intensive-Réanimation; Université de Lyon; INSERM 955, Créteil<br/> Bougon, David ; Centre Hospitalier Annecy Genevois, Service de Réanimation<br/> Lherm, Thierry; Hospital of Chartres, Medical ICU<br/> Kouatchet, Achille; Centre Hospitalier Universitaire d'Angers, Département de Réanimation Médicale et Médecine Hyperbare<br/> Ragot, Stéphanie; INSERM CIC 1402 ALIVE, Université de Poitiers, Faculté de Médecine et Pharmacie<br/> Thille, Arnaud; CHU de Poitiers, Médecine Intensive et Réanimation; INSERM CIC 1402, groupe ALIVE, Université de Poitiers</p> |
| <b>Primary Subject Heading</b>: | Intensive care                                                                                                                                                                                                                                                                                                                                                                                                                                                                                                                                                                                                                                                                                                                                                                                                                                                                                                                                                                                                                                                                                                                                                                                                                                                                                                                                                                                                                                                                                                                                                                                                                                                     |
| Secondary Subject Heading:      | Intensive care, Respiratory medicine                                                                                                                                                                                                                                                                                                                                                                                                                                                                                                                                                                                                                                                                                                                                                                                                                                                                                                                                                                                                                                                                                                                                                                                                                                                                                                                                                                                                                                                                                                                                                                                                                               |
| Keywords:                       | immunosuppression, acute respiratory failure, noninvasive ventilation, high-flow nasal cannula oxygen therapy, clinical trial, mortality                                                                                                                                                                                                                                                                                                                                                                                                                                                                                                                                                                                                                                                                                                                                                                                                                                                                                                                                                                                                                                                                                                                                                                                                                                                                                                                                                                                                                                                                                                                           |
|                                 |                                                                                                                                                                                                                                                                                                                                                                                                                                                                                                                                                                                                                                                                                                                                                                                                                                                                                                                                                                                                                                                                                                                                                                                                                                                                                                                                                                                                                                                                                                                                                                                                                                                                    |

SCHOLARONE™  
Manuscripts

1  
2  
3 **High-flow nasal oxygen therapy alone or with noninvasive ventilation in**  
4 **immunocompromised patients admitted to ICU for acute hypoxemic respiratory**  
5 **failure: the randomised multicentre controlled FLORALI-IM protocol**  
6  
7  
8  
9

10 *Rémi Coudroy*<sup>1</sup>, *Jean-Pierre Frat*<sup>1</sup>, *Stephan Ehrmann*<sup>2</sup>, *Frédéric Pène*<sup>3</sup>, *Nicolas Terzi*<sup>4</sup>,  
11 *Maxens Decavèle*<sup>5</sup>, *Gwenaël Prat*<sup>6</sup>, *Charlotte Garret*<sup>7</sup>, *Damien Contou*<sup>8</sup>, *Jeremy*  
12 *Bourenne*<sup>9</sup>, *Arnaud Gacouin*<sup>10</sup>, *Christophe Girault*<sup>11</sup>, *Jean Dellamonica*<sup>12</sup>, *Dominique*  
13 *Malacrino*<sup>13</sup>, *Guylaine Labro*<sup>14</sup>, *Jean-Pierre Quenot*<sup>15</sup>, *Alexandre Herbland*<sup>16</sup>,  
14 *Sébastien Jochmans*<sup>17</sup>, *Jérôme Devaquet*<sup>18</sup>, *Dalila Benzekri*<sup>19</sup>, *Emmanuel Vivier*<sup>20</sup>,  
15 *Saad Nseir*<sup>21</sup>, *Gwenhaël Colin*<sup>22</sup>, *Didier Thevenin*<sup>23</sup>, *Giacomo Grasselli*<sup>24</sup>, *Mona*  
16 *Assefi*<sup>25</sup>, *Claude Guérin*<sup>26</sup>, *David Bougon*<sup>27</sup>, *Thierry Lherm*<sup>28</sup>, *Achille Kouatchet*<sup>29</sup>,  
17 *Stéphanie Ragot*<sup>30</sup>, *Arnaud W. Thille*<sup>1</sup>.  
18  
19  
20  
21  
22  
23  
24

25 Rémi Coudroy on behalf of REVA research network.  
26  
27

28  
29 **Affiliations:**

30 <sup>1</sup> Médecine Intensive et Réanimation, CHU de Poitiers, Poitiers, France ; INSERM CIC  
31 1402, groupe ALIVE, Université de Poitiers, Poitiers, France  
32

33 <sup>2</sup> CHRU de Tours, Médecine Intensive Réanimation, CIC 1415, CRICS-TriggerSEP  
34 research network, Centre d'étude des pathologies respiratoires, INSERM U1100,  
35 Université de Tours, Tours, France  
36  
37

38 <sup>3</sup> Médecine intensive & Réanimation, Hôpital Cochin, APHP, Université Paris  
39 Descartes, Paris, France  
40

41 <sup>4</sup> Médecine Intensive Réanimation, INSERM, Université Grenoble-Alpes, U1042, HP2,  
42 Centre Hospitalier Universitaire Grenoble Alpes, Grenoble, France  
43

44 <sup>5</sup> Service de Pneumologie, Médecine Intensive et Réanimation, Département R3S,  
45 AP-HP ; INSERM, UMRS1158 Neurophysiologie Respiratoire Expérimentale et  
46 Clinique, Sorbonne Université, Groupe Hospitalier Pitié-Salpêtrière Charles Foix,  
47 Paris, France  
48  
49

50 <sup>6</sup> Médecine Intensive Réanimation, CHU de Brest, Brest, France  
51

52 <sup>7</sup> Médecine Intensive Réanimation, CHU de Nantes, Nantes, France  
53

54 <sup>8</sup> Service de Réanimation Polyvalente, Centre Hospitalier Victor Dupouy, Argenteuil,  
55 France  
56  
57  
58  
59  
60

1  
2  
3 <sup>9</sup> CHU La Timone 2, Médecine Intensive Réanimation, Réanimation des Urgences,  
4 Aix-Marseille Université, Marseille, France

5  
6 <sup>10</sup> Service des Maladies Infectieuses et Réanimation Médicale, CHU de Rennes,  
7 Hôpital Ponchaillou, Rennes, France

8  
9  
10 <sup>11</sup> Service de Réanimation Médicale, Hôpital Charles Nicolle, CHU de Rouen,  
11 Normandie Univ, Unirouen, UPRES EA-3830, Rouen, France

12  
13 <sup>12</sup> Médecine Intensive Réanimation, Centre Hospitalier Universitaire de Nice, Nice,  
14 France

15  
16  
17 <sup>13</sup> Service de réanimation, Centre hospitalier de Béthune, Beuvry, France

18  
19 <sup>14</sup> Medical Intensive Care Unit, Hôpital Jean Minjoz, Besançon, France ; Research  
20 Center EA3920, University of Franche-Comté, Besançon, France

21  
22 <sup>15</sup> Service de Médecine Intensive-Réanimation, CHU Dijon-Bourgogne, Dijon, France;  
23 INSERM U1231, Equipe Lipness, Dijon, France; Université Bourgogne-Franche-  
24 Comté, UMR1231 Lipides, Nutrition, Cancer, équipe Lipness, Dijon, France;  
25 LipSTIC LabEx, Fondation de coopération scientifique Bourgogne-Franche-Comté,  
26 Dijon, France; INSERM, CIC 1432, Module Epidémiologie Clinique, Dijon, France;  
27 CHU Dijon-Bourgogne, Centre d'Investigation Clinique, Module Epidémiologie  
28 Clinique/Essais Cliniques, Dijon, France

29  
30  
31 <sup>16</sup> Service de Réanimation, Centre hospitalier Saint Louis, La Rochelle, France

32  
33  
34 <sup>17</sup> Service de réanimation, Centre hospitalier Sud-Ile-de France, Melun, France

35  
36  
37 <sup>18</sup> Medical-Surgical Intensive Care Unit, Hôpital Foch, Suresnes, France

38  
39  
40 <sup>19</sup> Médecine Intensive Réanimation, Groupe Hospitalier Régional d'Orléans, Orléans,  
41 France

42  
43 <sup>20</sup> Reanimation Polyvalente, Hôpital Saint Joseph Saint Luc, Lyon, France

44  
45 <sup>21</sup> Centre de Réanimation, Université de Lille, CHU de Lille, Lille, France

46  
47 <sup>22</sup> Service de Médecine Intensive et Réanimation, Centre Hospitalier Départemental  
48 de Vendée, La Roche-sur-Yon, France

49  
50 <sup>23</sup> Service de Réanimation Polyvalente, CH de Lens, Lens, France

51  
52 <sup>24</sup> Department of Anesthesiology, Intensive Care and Emergency, Fondazione IRCCS  
53 Ca' Granda Ospedale Maggiore Policlinico, Milan, Italy ; Department of  
54 Pathophysiology and Transplantation, University of Milan, Milan, Italy

55  
56 <sup>25</sup> Multidisciplinary Intensive Care Unit, Department of Anesthesia and Critical Care  
57 Medicine, Pitie-Salpetriere Hospital, Assistance Publique Hopitaux de Paris, School of  
58 Medicine, University Pierre and Marie Curie (UPMC), Paris, France  
59  
60

1  
2  
3 26 Service de Médecine Intensive-Réanimation, Hôpital de La Croix-Rousse, Hospices  
4 civils de Lyon, Lyon, France ; Université de Lyon, Lyon, France ; INSERM 955, Créteil,  
5 France  
6

7  
8 27 Service de Réanimation, Centre Hospitalier Annecy Genevois, Annecy, France  
9

10 28 Medical ICU, Hospital of Chartres, Coudray, France  
11

12 29 Medical Intensive Care Unit, Centre hospitalier universitaire d'Angers, Angers,  
13 France  
14

15 30 INSERM CIC 1402, Biostatistics, Université de Poitiers, France  
16  
17

### 18 **Authors' e-mail:**

19  
20 [r.coudroy@yahoo.fr](mailto:r.coudroy@yahoo.fr); [jean-pierre.frat@chu-poitiers.fr](mailto:jean-pierre.frat@chu-poitiers.fr); [stephanehrmann@gmail.com](mailto:stephanehrmann@gmail.com);  
21 [frederic.pene@aphp.fr](mailto:frederic.pene@aphp.fr); [nterzi@chu-grenoble.fr](mailto:nterzi@chu-grenoble.fr); [maxencesar@hotmail.fr](mailto:maxencesar@hotmail.fr);  
22 [gwenael.prat@chu-brest.fr](mailto:gwenael.prat@chu-brest.fr); [charlotte.garret@chu-nantes.fr](mailto:charlotte.garret@chu-nantes.fr); [damien.contou@ch-argenteuil.fr](mailto:damien.contou@ch-argenteuil.fr);  
23 [Jeremy.BOURENNE@ap-hm.fr](mailto:Jeremy.BOURENNE@ap-hm.fr); [arnaud.gacouin@chu-rennes.fr](mailto:arnaud.gacouin@chu-rennes.fr);  
24 [christophe.girault@chu-rouen.fr](mailto:christophe.girault@chu-rouen.fr); [dellamonica.j@chu-nice.fr](mailto:dellamonica.j@chu-nice.fr);  
25 [dominique.malacrino@gmail.com](mailto:dominique.malacrino@gmail.com); [guylainelabro@hotmail.fr](mailto:guylainelabro@hotmail.fr); [jean-pierre.quenot@chu-dijon.fr](mailto:jean-pierre.quenot@chu-dijon.fr);  
26 [Alexandre.HERBLAND@ch-larochelle.fr](mailto:Alexandre.HERBLAND@ch-larochelle.fr);  
27 [sebastien.jochmans@gmail.com](mailto:sebastien.jochmans@gmail.com); [j.devaquet@hopital-foch.org](mailto:j.devaquet@hopital-foch.org); [dalila.benzekri@ch-orleans.fr](mailto:dalila.benzekri@ch-orleans.fr);  
28 [evivier@ch-stjoseph-stluc-lyon.fr](mailto:evivier@ch-stjoseph-stluc-lyon.fr); [saadnseir@yahoo.fr](mailto:saadnseir@yahoo.fr);  
29 [gwenhael.colin@chd-vendee.fr](mailto:gwenhael.colin@chd-vendee.fr); [dthevenin@ch-lens.fr](mailto:dthevenin@ch-lens.fr); [jaku71@gmail.com](mailto:jaku71@gmail.com);  
30 [mona.assefi@aphp.fr](mailto:mona.assefi@aphp.fr); [claud.guerin@chu-lyon.fr](mailto:claud.guerin@chu-lyon.fr); [dbougon@ch-annecygenevois.fr](mailto:dbougon@ch-annecygenevois.fr);  
31 [tlherm@ch-chartres.fr](mailto:tlherm@ch-chartres.fr); [AcKouatchet@chu-angers.fr](mailto:AcKouatchet@chu-angers.fr); [stephanie.ragot@univ-poitiers.fr](mailto:stephanie.ragot@univ-poitiers.fr);  
32 [aw.thille@gmail.com](mailto:aw.thille@gmail.com)  
33  
34  
35  
36  
37  
38  
39  
40  
41  
42  
43  
44

### 45 **Corresponding author:**

46 Remi Coudroy, Service de Médecine Intensive et Réanimation, CHU de Poitiers, 2 rue  
47 la Milétrie, 86021 Poitiers Cedex, France.

48 E-mail: [r.coudroy@yahoo.fr](mailto:r.coudroy@yahoo.fr)

49 Phone: +33549444007  
50  
51  
52  
53  
54

55 **Trial registration number:** NCT02978300  
56  
57

### 58 **Contributors**

59  
60

1  
2  
3 Remi Coudroy, Jean-Pierre Frat and Arnaud W Thille, in collaboration with Stephan  
4 Ehrmann, Frédéric Pène, Nicolas Terzi, Maxens Decavèle, Gwenaël Prat, Charlotte  
5 Garret, Damien Contou, Jeremy Bourenne ,Arnaud Gacouin, Christophe Girault, Jean  
6 Dellamonica, Dominique Malacrino, Guylaine Labro, Jean-Pierre Quenot, Alexandre  
7 Herbland, Sébastien Jochmans, Jérôme Devaquet, Dalila Benzekri, Emmanuel Vivier,  
8 Saad Nseir, Gwenhaël Colin, Didier Thevenin, Giacomo Grasselli, Mona Assefi,  
9 Claude Guérin, David Bougon, Thierry Lherm, Achille Kouatchet, Stéphanie Ragot and  
10 the REVA Network designed the study and wrote the manuscript together. Stephanie  
11 Ragot provided substantial contributions to the conception and design of the study,  
12 and wrote the statistical analysis plan and estimated the sample size with Remi  
13 Coudroy.

14  
15 Remi Coudroy, Jean-Pierre Frat, Stephan Ehrmann, Frédéric Pène, Nicolas Terzi,  
16 Maxens Decavèle, Gwenaël Prat, Charlotte Garret, Damien Contou, Jeremy Bourenne  
17 ,Arnaud Gacouin, Christophe Girault, Jean Dellamonica, Dominique Malacrino,  
18 Guylaine Labro, Jean-Pierre Quenot, Alexandre Herbland, Sébastien Jochmans,  
19 Jérôme Devaquet, Dalila Benzekri, Emmanuel Vivier, Saad Nseir, Gwenhaël Colin,  
20 Didier Thevenin, Giacomo Grasselli, Mona Assefi, Claude Guérin, David Bougon,  
21 Thierry Lherm, Achille Kouatchet, Stéphanie Ragot, and Arnaud W Thille contributed  
22 in drafting the work, revising it critically for important intellectual content and approved  
23 the final version of the manuscript. Remi Coudroy, Jean-Pierre Frat, Stephan  
24 Ehrmann, Frédéric Pène, Nicolas Terzi, Maxens Decavèle, Gwenaël Prat, Charlotte  
25 Garret, Damien Contou, Jeremy Bourenne ,Arnaud Gacouin, Christophe Girault, Jean  
26 Dellamonica, Dominique Malacrino, Guylaine Labro, Jean-Pierre Quenot, Alexandre  
27 Herbland, Sébastien Jochmans, Jérôme Devaquet, Dalila Benzekri, Emmanuel Vivier,  
28 Saad Nseir, Gwenhaël Colin, Didier Thevenin, Giacomo Grasselli, Mona Assefi,  
29 Claude Guérin, David Bougon, Thierry Lherm, Achille Kouatchet, Stéphanie Ragot,  
30 and Arnaud W Thille give their agreement to be accountable for all aspects of the work,  
31 and ensure the accuracy and integrity of any part of the work.

## 32 33 34 35 36 37 38 39 40 41 42 43 44 45 46 47 48 49 50 51 52 53 54 55 56 57 **Funding** 58 59 60



1  
2  
3 The study was funded by the 'Programme Hospitalier de Recherche Clinique Inter-  
4 Régional 2015' of the French Ministry of Health. The study promoter is the University  
5 Hospital of Poitiers, Poitiers, France.  
6  
7  
8  
9

### 10 **Disclaimer**

11 The firm Fisher & Paykel provided the high-flow oxygen therapy equipment and masks  
12 for noninvasive ventilation to all the participating centres but has no other involvement  
13 in the study.  
14  
15  
16  
17

### 18 **Competing interests**

19 RC reports travel expense coverage to attend scientific meetings from Fisher & Paykel  
20 and MSD.  
21  
22

23 JPF reports travel expense coverage to attend scientific meetings and personal fees  
24 from Fisher & Paykel and SOS Oxygène.  
25  
26

27 SE reports consulting fees from Aerogen, La diffusion technique française, Baxter,  
28 Bayer, lecture fees from Aerogen, Fisher & Paykel, unrestricted research grants /  
29 research support from from Fisher & Paykel, Hamilton medical, Aerogen, La diffusion  
30 technique française.  
31  
32  
33

34 Chr G reports travel expense coverage to attend scientific meetings, personal fees and  
35 logistic support from Fisher & Paykel, Resmed and Lowenstein Medical.  
36  
37

38 AWT reports travel expense coverage to attend scientific meetings and payment for  
39 lectures from Fisher & Paykel, Covidien, Maquet-Getinge, General Electric Healthcare.  
40  
41

42 SJ reports personal fees for lectures from Hamilton Medical and Nihon Kohden.

43 GG reports payment for lectures from Getinge, Draeger Medical, Pfizer,  
44 Fisher&Paykel, and travel/accommodation/congress registration support from Biotest  
45 and Getinge.  
46  
47

48 FP, NT, MD, GP, Cha G, DC, JB, AG, JD, DM, GL, JPQ, AH, JD, DB, EV, SN, GC, DT,  
49 MA, CI G, DB, TL, AK, SR and report no conflict of interest.  
50  
51  
52

### 53 **Ethics approval**

54 The first version of the study protocol has been approved by the central ethics  
55 committee (Ethics Committee Ouest III, Poitiers, France) with the registration number  
56 2016-A00834-47 (23 March 2016).  
57  
58  
59  
60

1  
2  
3  
4  
5  
6  
7  
8  
9  
10  
11  
12  
13  
14  
15  
16  
17  
18  
19  
20  
21  
22  
23  
24  
25  
26  
27  
28  
29  
30  
31  
32  
33  
34  
35  
36  
37  
38  
39  
40  
41  
42  
43  
44  
45  
46  
47  
48  
49  
50  
51  
52  
53  
54  
55  
56  
57  
58  
59  
60

**Provenance and peer review**

Not commissioned; externally peer reviewed.

For peer review only

**ABSTRACT (249 words)**

**Introduction:** Noninvasive ventilation (NIV) is recommended as first-line therapy in respiratory failure of critically ill immunocompromised patients as it can decrease intubation and mortality rates as compared to standard oxygen. However, its recommendation is only conditional. Indeed, the use of NIV in this setting has been challenged recently based on results of trials finding similar outcomes with or without NIV or even deleterious effects of NIV. To date, NIV has been compared to standard oxygen but not to high-flow nasal oxygen therapy (HFOT) in immunocompromised patients. Several studies have found lower mortality rates using HFOT alone than when using HFOT with NIV sessions in patients with de novo respiratory failure, and even in immunocompromised patients. We are hypothesizing that HFOT alone is more effective than HFOT with NIV sessions and reduces mortality of immunocompromised patients with acute hypoxemic respiratory failure.

**Methods and analysis:** This study is an investigator-initiated, multicentre randomised controlled trial comparing HFOT alone or with NIV in immunocompromised patients admitted to ICU for severe acute hypoxemic respiratory failure. Around 280 patients will be randomised with a 1:1 ratio in two groups. The primary outcome is the mortality rate at day 28 after inclusion. Secondary outcomes include the rate of intubation in each group, length of ICU and hospital stay, and mortality up to day 180.

**Ethics and dissemination:** The study has been approved by the ethics committee and patients will be included after informed consent. The results will be submitted for publication in peer-reviewed journals.

**Trial registration number:** NCT02978300

**Keywords:** immunosuppression, acute respiratory failure, noninvasive ventilation, high-flow nasal cannula oxygen therapy, clinical trial, mortality

### Strengths and limitations of the study

- This trial is the first to compare high-flow nasal oxygen therapy (HFOT) alone versus HFOT with non-invasive ventilation (NIV) sessions for treatment of acute hypoxemic respiratory failure in immunocompromised patients admitted to ICU.
- The settings of the oxygenation techniques compared have been protocolised based on physiologic studies in order to optimise their efficiency (improvement in oxygenation, decrease in work of breathing, limitation of patient self-inflicted lung injury).
- The sample size of this trial has been designed to have the power to detect a difference in mortality rates of patients with severe acute hypoxemic respiratory failure.
- Limitation: The individual study assignments of the patients will not be masked. Given the nature of the two strategies under evaluation, a double-blind trial is not possible.

**Word count: 3582**

## INTRODUCTION

### Background and rationale

Acute hypoxemic respiratory failure is the leading cause of admission to intensive care units (ICU) in immunocompromised patients.<sup>1</sup> Intubation and subsequent invasive mechanical ventilation are needed in about two-thirds of cases and are associated with particularly high mortality reaching 50-70% of cases.<sup>1-3</sup> Therefore, it is crucial to assess the best strategy of oxygenation with the aim of avoiding the need for intubation in immunocompromised patients.

According to a large international cohort study, noninvasive ventilation (NIV) is used in up to 21% of cases in this setting.<sup>4</sup> It is worth noting that recent European/American clinical practice guidelines have recommended NIV as first-line therapy for management of acute hypoxemic respiratory failure in immunocompromised patients.<sup>5</sup> Indeed, by pooling all randomised controlled trials, NIV has been associated with decreased intubation and mortality rates as compared to standard oxygen (**Table 1**).<sup>6-9</sup> However, the largest randomised controlled trial comparing NIV versus standard oxygen found no difference in intubation or mortality rates and application of NIV was consequently only a conditional recommendation.<sup>6</sup>

All previous studies have compared NIV to standard oxygen and not versus high-flow nasal oxygen therapy (HFOT).<sup>5</sup> Recently, better outcomes have been reported with HFOT than with standard oxygen, and even as compared to HFOT with NIV in patients with acute hypoxemic respiratory failure.<sup>10-12</sup> However, the design of these studies (retrospective monocentre or post-hoc) excludes any definite conclusion on the best treatment option for immunocompromised critically ill.<sup>10,11,13</sup> Therefore, there is an urgent need for a dedicated trial designed to compare NIV to HFOT in immunocompromised critically ill patients taking into account the suggested deleterious effects of NIV.<sup>10,11</sup> Indeed, NIV may be associated with harmful effects in *de novo* respiratory failure,<sup>14</sup> especially in patients generating strong inspiratory efforts and subsequent large tidal volumes due to high transpulmonary pressures.<sup>15,16</sup> It could be argued that NIV protocol had not been protective enough, *i.e.* by applying low levels of pressure-support to avoid large tidal volumes that may worsen underlying lung injury,<sup>17</sup> by applying high levels of positive end-expiratory pressure (PEEP) to promote alveolar recruitment as is the case in patients invasively ventilated for acute respiratory

1  
2  
3 distress syndrome (ARDS),<sup>18,19</sup> and by applying prolonged sessions of NIV to avoid  
4 derecruitment during NIV breakoffs.<sup>20,21</sup> Indeed, while most of these patients meet the  
5 clinical criteria for ARDS,<sup>22</sup> optimisation of ventilator settings during NIV could lead to  
6 better outcomes, as is the case in patients under invasive mechanical ventilation.  
7  
8  
9

## 10 11 12 **Objectives**

13 We are aiming to conduct a prospective multicentre randomised controlled trial  
14 comparing HFOT alone or with optimised NIV sessions in immunocompromised  
15 patients admitted to ICU for acute hypoxemic respiratory failure. Our hypothesis is that  
16 HFOT alone may reduce mortality rate at day 28 as compared to HFOT with NIV,  
17 despite application of NIV with protective ventilator settings.  
18  
19  
20  
21  
22

### 23 24 **Primary objective**

25 To compare the mortality rate at day 28 after inclusion between HFOT alone and HFOT  
26 with NIV in immunocompromised patients admitted to ICU for acute hypoxemic  
27 respiratory failure.  
28  
29  
30  
31

### 32 33 **Secondary objectives**

- 34 - To compare the rates of intubation, and of mortality in ICU, in hospital, at day 90 and  
35 at day 180 after inclusion between the 2 strategies.  
36  
37 - To compare length of stay in ICU, in hospital, and number of ventilator-free days  
38 (invasive or noninvasive mechanical ventilation) within the 28 days following inclusion.  
39  
40 - To compare tolerance between the 2 strategies.  
41  
42  
43  
44

### 45 46 **Trial design**

47 The FLORALI-IM study is an investigator-initiated, prospective, multicentre,  
48 randomised, controlled, open trial comparing 2 strategies of oxygenation using HFOT  
49 alone or with NIV in immunocompromised patients admitted to ICU for acute  
50 hypoxemic respiratory failure. Patients will be randomly assigned to the HFOT alone  
51 group or the HFOT with NIV group with a 1:1 ratio.  
52  
53  
54  
55  
56  
57

## 58 59 **METHODS: PATICIPANTS, INTERVENTIONS AND OUTCOMES**

### 60 **Study setting**

1  
2  
3 The FLORALI-IM study is taking place in 29 ICUs in France and 1 ICU in Italy.  
4  
5

## 6 **Eligibility criteria**

### 7 *Inclusion criteria*

8  
9  
10 Adult immunocompromised patients admitted to ICU for acute hypoxemic respiratory  
11 failure are considered eligible.  
12

13 Acute hypoxemic respiratory failure is defined by respiratory rate  $\geq 25$  breaths/min, and  
14  $\text{PaO}_2/\text{FiO}_2 \leq 300$  mm Hg while spontaneously breathing under standard oxygen with  
15 oxygen flow rate of at least 10 l/min, under HFOT, or under NIV. For patients under  
16 standard oxygen,  $\text{FiO}_2$  is calculated according to the following formula:  $\text{FiO}_2 = 0.21 +$   
17  $0.03$  per supplemental litre of oxygen.<sup>14</sup>  
18  
19

20  
21  
22 Immunosuppression is defined by one of the following criteria: hematologic malignancy  
23 (active or remitting for less than 5 years), allogenic stem cell transplantation within the  
24 last 5 years, active solid cancer, leukopenia  $< 1$  G/l or neutropenia  $\leq 0.5$  G/l induced  
25 by chemotherapy, solid organ transplantation, acquired immunodeficiency syndrome,  
26 systemic steroids  $\geq 0.5$  mg/kg/day of prednisone equivalent for at least 3 weeks,  
27 immunosuppressive or immunomodulatory drugs.<sup>23</sup>  
28  
29  
30  
31  
32

### 33 *Exclusion criteria*

34  
35  
36 Patients fulfilling one of the following criteria will not be included:  $\text{PaCO}_2$  above 50 mm  
37 Hg, patients who could strongly benefit from NIV *i.e.* with underlying chronic lung  
38 disease, cardiogenic pulmonary oedema or postoperative patients; severe shock  
39 defined as vasopressor dose  $> 0.3$   $\mu\text{g}/\text{kg}/\text{min}$  of norepinephrine-equivalent to maintain  
40 systolic blood pressure  $> 90$  mm Hg or with impaired consciousness with a Glasgow  
41 coma score  $\leq 12$ ; patients with urgent need for intubation *i.e.* respiratory or cardiac  
42 arrest, respiratory pauses with loss of consciousness or gasping for air, severe  
43 hypoxemia defined as  $\text{SpO}_2$  lower than 90% despite maximal oxygen support; patients  
44 with do-not-intubate order at time of inclusion; or patients with contraindication to NIV  
45 according to the French consensus conference,<sup>24</sup> *i.e.* patient refusal, cardiorespiratory  
46 arrest, coma, non-drained pneumothorax, unresolved vomiting, upper airway  
47 obstruction, hematemesis, or severe facial trauma.  
48  
49  
50  
51  
52  
53  
54  
55  
56  
57

## 58 **Intervention**

1  
2  
3 Patients eligible for inclusion will be informed, asked for consent, then randomised  
4 within the first 6 hours after they meet inclusion criteria, and assigned to one of the 2  
5 following groups: 1) The patients assigned to control group will receive HFOT with NIV  
6 sessions; 2) The patients assigned to interventional group will receive HFOT alone.  
7  
8

9  
10 The purpose of this 6-hour time frame is to avoid the possibly harmful delayed initiation  
11 of oxygenation strategies. As NIV may be more effective in hematologic or neutropenic  
12 patients,<sup>7</sup> randomization will be stratified according to the existence of underlying  
13 hematologic malignancy, leukopenia < 1 G/l or neutropenia ≤ 0.5 G/l induced by  
14 chemotherapy.  
15  
16  
17  
18

#### 19 20 *Interventional group: HFOT alone*

21  
22 Immediately after randomisation, patients assigned to the interventional group will be  
23 continuously treated by HFOT (Optiflow or AIRVO2, Fisher & Paykel, Auckland, New  
24 Zealand) with a flow of 60 l/min and FiO<sub>2</sub> adjusted to obtain adequate oxygenation  
25 (SpO<sub>2</sub> ≥ 92%) through a heated humidifier (MR 850, Fisher & Paykel, Auckland, New  
26 Zealand) set to the 'intubation' position. For patients experiencing HFOT intolerance  
27 due to high flow levels despite reinsurance, flow will be decreased to the maximal  
28 tolerated level.  
29  
30  
31  
32  
33

#### 34 35 *Control group: HFOT with NIV*

36  
37 Immediately after randomisation, NIV will be initiated with a first session of at least 4h  
38 until clinical improvement (assessed by the attending physician) and then applied by  
39 sessions of at least 1h for a minimal duration of at least 12 hours a day. NIV will be  
40 carried out with a ventilator dedicated for NIV (ICU ventilator after activation of NIV  
41 mode or NIV bi-level ventilator)<sup>25</sup> in pressure-support (PS) ventilatory mode with a  
42 minimal PS level of 5 cm H<sub>2</sub>O targeting a tidal volume of 6 ml/kg of predicted body  
43 weight and avoiding tidal volumes exceeding 8 ml/kg, a PEEP level of at least 8 cm  
44 H<sub>2</sub>O, and FiO<sub>2</sub> adjusted to obtain adequate oxygenation (SpO<sub>2</sub> ≥ 92%). Between NIV  
45 sessions, HFOT will be delivered as in the interventional group. For patients  
46 experiencing NIV intolerance despite reinsurance, physicians will be encouraged to  
47 modify NIV settings (level of pressure-support and PEEP, minimizing leaks, adjustment  
48 of inspiratory trigger and cycling, interface switch) to improve NIV tolerance.  
49  
50  
51  
52  
53  
54  
55  
56  
57  
58  
59

#### 60 *Duration of treatment*



1  
2  
3 In the 2 groups, strategies of oxygenation will be applied for a minimal duration of 48h.  
4 After that, continuation of the treatment will be decided according to patient respiratory  
5 status (**Figure 1**).  
6  
7  
8  
9

### 10 *Criteria for weaning oxygenation strategies*

11 As there is no consensual method of weaning from HFOT or NIV, we propose a  
12 standardised weaning protocol to mitigate differences between centres. From 48h after  
13 inclusion, weaning from both oxygenation strategies will be assessed twice a day  
14 during the investigator's round.  
15

16 In the HFOT alone group, HFOT will be stopped and switched to standard oxygen  
17 when respiratory rate is  $< 25$  breaths/min and  $SpO_2 \geq 92\%$  with  $FiO_2 \leq 50\%$  and flow  
18  $\leq 50$  L/min.  
19

20 In the NIV group, NIV will be stopped first when respiratory rate is  $< 25$  breaths/min  
21 and  $SpO_2 \geq 92\%$  with  $FiO_2 \leq 50\%$ , and then HFOT will be stopped and switched to  
22 standard oxygen as in the HFOT alone group.  
23

24 At any time after weaning of oxygenation techniques, if respiratory rate is  $\geq 25$   
25 breaths/min or  $SpO_2 < 92\%$  HFOT or HFOT with NIV sessions will be resumed  
26 according to randomisation group.  
27  
28

### 29 *Prespecified intubation criteria*

30 In order to avoid harmful effects of delayed intubation in patients treated with NIV<sup>26,27</sup>  
31 and HFOT,<sup>28</sup> intubation will be performed if at least one of the following criteria is  
32 fulfilled: neurological failure defined as agitation or altered consciousness defined as a  
33 Glasgow coma scale below 12 points, hemodynamic failure defined as the need for a  
34 dose of norepinephrine greater than  $0.3 \mu\text{g}/\text{kg}/\text{min}$  of norepinephrine-equivalent to  
35 maintain systolic blood pressure greater than 90 mm Hg, persisting or worsening  
36 respiratory failure defined by the presence of at least 2 criteria among the following:  
37 respiratory rate  $> 40$  /min, lack of improvement of high respiratory muscle workload,  
38 severe hypoxemia defined as a need for  $FiO_2$  of 100% to maintain  $SpO_2 \geq 92\%$  or  
39  $PaO_2/FiO_2 \leq 100$  mm Hg, and acidosis defined as  $\text{pH} < 7.35$  units.  
40  
41  
42  
43  
44  
45  
46  
47  
48  
49  
50  
51  
52  
53  
54  
55

### 56 **Outcomes**

#### 57 *Primary outcome*

58 The primary outcome is mortality at day 28 after randomization.  
59  
60

### Secondary outcomes

Secondary outcome variables include the following:

1. Mortality in ICU, in hospital, at day 90 and at day 180,
2. Intubation at day 28 from randomization.
3. Length of stay in ICU and in hospital,
4. Number of ventilator-free days, and number of oxygenation techniques-free days within the 28 days following randomization,
5. Tolerance of oxygenation techniques.

### Sample size

We determined that inclusion of 280 analysable patients would provide a power of 80% to highlight an absolute difference of 15% in rate of mortality at day 28 after randomization between the control group using HFOT with NIV (mortality rate estimated of 35%) and the intervention group using HFOT alone (mortality rate estimated of 20%). As NIV may be more effective according to type of immunosuppression, stratification will be performed in order to have the same number of patients with hematologic malignancy, leukopenia or neutropenia induced by chemotherapy in each group.

### Estimated rates of mortality in the two groups

The estimated mortality rates in the two groups are based on the recent literature. Mortality rates at day 28 reported in patients treated with HFOT and NIV are particularly homogeneous: 37% in a retrospective monocentre study,<sup>13</sup> 38% in a post-hoc analysis of a randomized trial,<sup>10</sup> and 36% in our preliminary study.<sup>11</sup> A lower mortality rate (24%) has been reported in patients treated with NIV in a randomised trial.<sup>6</sup> However, this difference could be explained by the lower severity of respiratory failure at admission. According to our previous studies, we can estimate a mortality rate of 20% in the interventional group.<sup>10,11</sup> A recent trial reported a mortality rate of 36% in patients treated with HFOT alone.<sup>29</sup> However, a high proportion of patients died without prior intubation in the HFOT alone group (55 patients, 40%), *i.e.* with a do-not-intubate order, and the actual mortality rate was closer to 25% after exclusion of these patients.

### Recruitment

1  
2  
3 Initial expected duration of patient inclusion is 2 years, starting in January 2017.

- 4  
5 • End of 2015: grant award;  
6  
7 • 2016: approval by an independent ethics committee;  
8  
9 • 2017: inclusion of patients;  
10  
11 • 2019: end of inclusions, monitoring of participating centres and queries to  
12 investigators; overseeing by the steering committee at the REVA Network  
13 meetings; blind review to determine protocol violation, to define intention-to-treat  
14 and per-protocol analysis populations; new queries to investigators, cleaning and  
15 closure of the database;  
16  
17 • 2020-2021: data analysis, writing of the manuscript and submission for publication.  
18  
19  
20  
21  
22  
23

## 24 **METHODS: ASSIGNMENT OF INTERVENTION, DATA COLLECTION,** 25 **MANAGEMENT AND ANALYSIS**

### 26 **Allocation and sequence intervention**

27  
28 A computer-generated randomization is performed with stratification according to  
29 centre and the type of immunosuppression (haematological malignancy or leukopenia  
30 < 1 G/l or neutropenia  $\leq$  0.5 G/l vs. the other types of immunosuppression) in a 1:1  
31 ratio and by blocks, using a centralized web-based management system (Clinfile).  
32 After randomization, the strategy assigned to the patient (HFOT alone or with NIV) will  
33 be initiated immediately.  
34  
35  
36  
37  
38  
39  
40

### 41 **Data collection and management**

42  
43 Data will be collected on an electronic-Case Report Form by a trained investigator or  
44 research assistant at each centre (**Figure 2**). At time of inclusion, the following data  
45 will be collected: informed consent, demographic characteristics, Charlson score,<sup>28</sup>  
46 vital signs, current oxygenation settings (oxygen flow under standard oxygen, FiO<sub>2</sub> and  
47 gas flow under HFOT, and FiO<sub>2</sub>, pressure-support levels and PEEP under NIV),  
48 tolerance to oxygenation devices using a visual analogic scale, arterial blood gases  
49 and analysis of chest X-ray. Similar data and an evaluation of dyspnoea using a 5-  
50 point Likert scale will be recorded at H1, between H6 and H12, at H24  $\pm$  6h, H48  $\pm$  6h  
51 and H72  $\pm$  6h after randomization. Duration of the first NIV session and total duration  
52 of NIV within the first 24h, between H24 and H48 and between H48 and H72 will be  
53  
54  
55  
56  
57  
58  
59  
60

1  
2  
3 collected to ensure adherence to the protocol. The type of ventilator used for NIV and  
4 the NIV interface will be noted. For intubated patients, time and reason for intubation  
5 will be documented according to the above-mentioned criteria. Invasive ventilatory  
6 settings, arterial blood gases and chest X-ray will be recorded during the first 3 days  
7 following intubation. At day 28, vital status, need for intubation, total duration of  
8 invasive ventilation and of each oxygenation technique studied will be recorded. At ICU  
9 and hospital discharge, vital status and length of stay will be noted. At day 90 and day  
10 180, vital status and Eastern Cooperative Oncology Group score will be recorded.<sup>30</sup>  
11 As the absence of aetiology of acute respiratory failure could influence mortality,<sup>31</sup>  
12 investigators are strongly encouraged to have an active diagnostic strategy. Results of  
13 the noninvasive diagnostic tests, bronchoalveolar lavage and chest CT-scan will be  
14 collected.<sup>32</sup>

### 25 **Statistical methods**

26 All the analyses will be performed by the study statistician according to a predefined  
27 statistical analysis plan and using statistical software (SAS, V.9.4; SAS Institute; USA).  
28 A two-tailed P value of less than 0.05 will be considered as indicating statistical  
29 significance.

#### 35 *Descriptive analysis of patient groups at baseline*

36 Continuous variables will be summarized with the classic parameters of descriptive  
37 analysis (median, interquartile ranges or mean and standard deviation), while  
38 indicating the number of missing data. Category variables will be presented in the form  
39 of absolute frequency and percentage in each modality. The analysis will be performed  
40 on an intention-to-treat basis, including all patients having undergone randomisation.  
41 Deviations from the protocol will be described and analysed on a case-by-case basis  
42 after validation by a blind review committee.

43 No imputation for missing values will be carried out.

#### 52 *Analysis pertaining to the main criteria of evaluation*

53 Mortality rates at day 28 after randomization will be compared between the 2 groups  
54 by means of a Chi<sup>2</sup> test. Analysis of this primary outcome will subsequently be  
55 completed by multivariate logistic regression after testing for interactions between  
56 treatment effect and strata. Survival time will be described by means of Kaplan–Meier  
57  
58  
59  
60

1  
2  
3 method and compared with a log-rank test at day 28. A Cox proportional-hazards  
4 model will be used to calculate hazard ratio with 95% confidence interval.

5  
6 Logistic and Cox regression maximal models will include all the variables associated  
7 with mortality at day 28 with a p value <0.20 in the univariate analysis. The final model  
8 will be obtained by a backward-selection procedure and will include variables  
9 significantly associated with mortality at day 28 with a P value of less than 0.05.  
10  
11  
12  
13  
14

### 15 *Analysis pertaining to the secondary criteria of evaluation*

16  
17 Length of stay, number of ventilator-free days and number of oxygenation technique-  
18 free days will be compared between the two treatment groups using the Student's t-  
19 Test (or Mann-Whitney test if necessary). Time to ICU death, time to hospital death or  
20 time to intubation will be described by means of the Kaplan Meier method and  
21 compared between the two treatment groups with a logrank test. Efficacy and tolerance  
22 of oxygenation techniques will be compared between the 2 groups using Student's t-  
23 Test (or Mann-Whitney test) for quantitative variables and Chi<sup>2</sup> test for qualitative  
24 variables. Ventilator-free days at day 28 will be calculated as one point for each day  
25 between inclusion to day 28 that patients are both alive and free of mechanical  
26 ventilation.  
27  
28  
29  
30  
31  
32  
33  
34  
35

### 36 *Per-protocol analysis*

37  
38 The proportion of patients treated according to the prespecified intervention goals will  
39 be calculated for each randomisation group. According to their sample size, their  
40 outcomes will be compared using the same methods as in the intention-to-treat  
41 analysis.  
42  
43  
44  
45

### 46 *Predetermined Subgroup Analysis*

47  
48 Randomization is stratified according to type of immunosuppression in order to have  
49 the same number of patients with hematologic malignancy, leukopenia or neutropenia  
50 induced by chemotherapy in each group. A subgroup analysis will consequently be  
51 performed for the main and secondary criteria of evaluation in this subgroup of patients  
52 and in patients with another type of immunosuppression. Prior to adjustment, an  
53 interaction test will be carried out to detect heterogeneity of treatment effect according  
54 to type of immunosuppression.  
55  
56  
57  
58  
59  
60

1  
2  
3 As benefits of HFOT may be influenced by baseline PaO<sub>2</sub>/FiO<sub>2</sub>, a subgroup analysis  
4 will be performed for the main and secondary criteria of evaluation in patients with  
5 PaO<sub>2</sub>/FiO<sub>2</sub> ≤ 200 mm Hg at inclusion.  
6  
7

8 Subgroup analysis will be performed according to:  
9

- 10 • The cause of respiratory failure as it may influence outcomes;<sup>31</sup>
- 11 • The type of NIV interface in the control group as it may influence outcomes;<sup>33</sup>
- 12 • The existence of protocol violations during the first 48 hours after inclusion.  
13  
14  
15

### 16 17 *Ancillary study*

18 Data on nutrition practice in patients with acute respiratory failure is scarce.<sup>34</sup> In  
19 voluntary participating centres, we have planned to collect nutrition practice. Therefore,  
20 in an ancillary study, we will describe daily nutritional intake from inclusion to day 28  
21 or intubation or ICU discharge or death, type of nutrition, amount of calories intake,  
22 existence of complications related to nutrition and the reason for maintaining patient  
23 fasting.  
24  
25  
26  
27  
28  
29

### 30 31 *Data monitoring*

32 An investigator at each centre will be responsible for daily patient screening, enrolling  
33 patients in the study, ensuring adherence to the protocol and completing the e-CRF.  
34 Research assistants will regularly monitor all the centres on site to check adherence  
35 to the protocol and accuracy of the data recorded.  
36  
37  
38  
39  
40

### 41 42 *Patient and public involvement*

43 Patients and public were not involved in the study  
44  
45

### 46 47 **Study status**

- 48 • Current status: the last patient was included on March 4<sup>th</sup> 2019;
- 49 • Expected date of complete data collection: mid-September 2019 (6-month  
50 follow-up of the last patient included);
- 51 • Expected date of the end of monitoring of participating centres: December 2019
- 52 • Expected starting date of data analysis: 1<sup>st</sup> trimester 2020  
53  
54  
55  
56  
57  
58  
59  
60

## ETHICS AND DISSEMINATION

### *Consent or assent*

Patients will be included after verification of the eligibility criteria and having provided an informed consent to the investigator according to the decision of the central ethics committee. For patients not able to provide informed consent, their next-of-kin will be contacted according to the same procedure. Patients will be informed as soon as possible by the investigator of their participation in the study and their consent to continue to participate in the study will be retrieved.

### *Confidentiality*

Data will be handled according to French law. All original records will be archived at trial sites for 25 years. The clean database file will be de-identified and kept for 25 years.

### *Declaration of interest*

The FLORALI-IM study is an investigator-initiated trial supported by the French Ministry of Health with funds obtained in 2015 from an inter-regional hospital clinical research program ('Programme Hospitalier de Recherche Clinique Inter-Régional 2015'). The European research network REVA has endorsed the study project. The study is promoted by the University Hospital of Poitiers. The study promoter has received a grant from AADAIRC and SOS oxygène. Fisher & Paykel Healthcare provides high-flow oxygen therapy equipment and face masks for NIV to all the participating centres but has no other involvement in the study.

### *Access to data*

All investigators will have access to the final data set. Participant-level data sets will be made accessible on a controlled access basis.

### *Dissemination policy*

Findings will be published in peer-reviewed journals and presented at local, national and international meetings and conferences to publicize and explain the research to clinicians, commissioners and service users.

## DISCUSSION

In immunocompromised patients, invasive ventilation is associated with particularly high mortality rates and application of NIV is currently recommended as a means of avoiding intubation.<sup>5</sup> Almost 20 years ago, two randomised controlled trials including a small sample of patients reported decreased intubation and mortality rates with NIV as compared to standard oxygen therapy.<sup>7,8</sup> By contrast, more recent studies including larger samples of patients have found either similar outcomes or even an increased risk of mortality in patients treated with NIV compared to oxygen alone.<sup>6,10</sup> In a large controlled trial including 376 immunocompromised patients, outcomes were similar between patients treated with NIV and those treated with oxygen therapy.<sup>6</sup> However, a high proportion of patients had mild respiratory failure, more than one-third of the patients in the control group received HFOT while those in the interventional group received short sessions of NIV, and all these factors together may have mitigated the difference between the 2 groups.<sup>6</sup> In a post-hoc analysis of a randomized controlled trial including 82 immunocompromised patients with severe acute hypoxemic respiratory failure, patients treated with HFOT alone had lower mortality than those treated with HFOT with NIV sessions.<sup>10</sup>

To explain the lack of effect or harmful effects of NIV, it could be argued that NIV was not carried out with optimal ventilator settings for patients of whom the majority met the clinical criteria for ARDS. Indeed, they had particularly large tidal volumes under NIV, which could be associated with increased risk of mortality by potential worsening of pre-existing lung injury.<sup>15–17,35,36</sup> PEEP levels remained relatively low whereas the treatment represents a major adjustment in ARDS patients, and NIV was applied for a duration of only 8h in mean within the first 24 hours.<sup>6,10</sup> Another study has found that NIV performed with helmet may be more efficient than with face mask.<sup>33</sup> Interestingly, patients treated with helmet also received lower pressure-support levels and higher PEEP levels than those treated with facemask, thereby highlighting the potential impact of ventilatory settings on outcomes.<sup>33</sup> Consequently, we decided to apply a protective NIV protocol aimed at avoiding large tidal volumes, and applying prolonged sessions of NIV with high PEEP levels.

In a recent large randomized controlled trial including 776 immunocompromised patients, mortality rates at day 28 did not differ between patients treated with HFOT and those treated with standard oxygen.<sup>29</sup> However, 40% of the deceased patients in the HFOT group died without prior intubation and the high proportion of patients with



1  
2  
3 do-not-intubate order may have mitigated the beneficial effects of HFOT.<sup>29</sup> By contrast,  
4 several studies have reported promising results of HFOT alone versus standard  
5 oxygen or NIV in patients with *de novo* respiratory failure, even in  
6 immunocompromised patients.<sup>10–12,14</sup>  
7  
8

9  
10 The FLORALI-IM trial has several strengths. First, it will be the first study comparing  
11 HFOT alone versus HFOT with NIV sessions in immunocompromised patients.  
12  
13 Second, the study will include only severe patients with acute hypoxemic respiratory  
14 failure. Third, NIV will be optimized using low levels of pressure-support targeting a  
15 tidal volume between 6 and 8 ml/kg, PEEP levels of at least 8 cm H<sub>2</sub>O, and duration of  
16 NIV more than 12h a day during the first 48h.  
17  
18  
19

20 In conclusion, the FLORALI-IM trial is an investigator-initiated randomised controlled  
21 trial empowered to test the hypothesis that HFOT alone may in comparison with HFOT  
22 and NIV decrease mortality rate at day 28 of immunocompromised patients admitted  
23 to ICU for acute respiratory failure. Innovative aspects include the 2 groups of  
24 treatment in this clinical setting and the optimised protocol to carry out NIV and HFOT.  
25  
26  
27  
28  
29  
30  
31  
32  
33  
34  
35  
36  
37  
38  
39  
40  
41  
42  
43  
44  
45  
46  
47  
48  
49  
50  
51  
52  
53  
54  
55  
56  
57  
58  
59  
60

## REFERENCES

1. Azoulay E, Mokart D, Pène F, Lambert J, Kouatchet A, Mayaux J, Vincent F, Nyunga M, Bruneel F, Laisne L-M, Rabbat A, Lebert C, Perez P, Chaize M, Renault A, Meert A-P, Benoit D, Hamidfar R, Jourdain M, Darmon M, Schlemmer B, Chevret S, Lemiale V. Outcomes of critically ill patients with hematologic malignancies: prospective multicenter data from France and Belgium--a groupe de recherche respiratoire en réanimation onco-hématologique study. *J Clin Oncol* 2013;31(22):2810–8.
2. for the Efraim investigators and the Nine-I study group, Azoulay E, Pickkers P, Soares M, Perner A, Rello J, Bauer PR, van de Louw A, Hemelaar P, Lemiale V, Taccone FS, Martin Loeches I, Meyhoff TS, Salluh J, Schellongowski P, Rusinova K, Terzi N, Mehta S, Antonelli M, Kouatchet A, Barratt-Due A, Valkonen M, Landburg PP, Bruneel F, Bukan RB, Pène F, Metaxa V, Moreau AS, Souppart V, Burghi G, Girault C, Silva UVA, Montini L, Barbier F, Nielsen LB, Gaborit B, Mokart D, Chevret S. Acute hypoxemic respiratory failure in immunocompromised patients: the Efraim multinational prospective cohort study. *Intensive Care Medicine* 2017;43(12):1808–19.
3. Gristina GR, Antonelli M, Conti G, Ciarlone A, Rogante S, Rossi C, Bertolini G, GiViTI (Italian Group for the Evaluation of Interventions in Intensive Care Medicine). Noninvasive versus invasive ventilation for acute respiratory failure in patients with hematologic malignancies: a 5-year multicenter observational survey. *Crit Care Med* 2011;39(10):2232–9.
4. LUNG SAFE Investigators and the ESICM Trials Group, Cortegiani A, Madotto F, Gregoretti C, Bellani G, Laffey JG, Pham T, Van Haren F, Giarratano A, Antonelli

- 1  
2  
3 M, Pesenti A, Grasselli G. Immunocompromised patients with acute respiratory  
4 distress syndrome: secondary analysis of the LUNG SAFE database. *Critical Care*  
5 [Internet] 2018 [cited 2018 Sep 28];22(1). Available from:  
6 <https://ccforum.biomedcentral.com/articles/10.1186/s13054-018-2079-9>  
7  
8  
9  
10  
11  
12  
13 5. Rochweg B, Brochard L, Elliott MW, Hess D, Hill NS, Nava S, Navalesi P,  
14 Antonelli M, Brozek J, Conti G, Ferrer M, Guntupalli K, Jaber S, Keenan S,  
15 Mancebo J, Mehta S, Raouf S. Official ERS/ATS clinical practice guidelines:  
16 noninvasive ventilation for acute respiratory failure. *Eur Respir J* 2017;50(2).  
17  
18  
19  
20  
21  
22  
23 6. Lemiale V, Mokart D, Resche-Rigon M, Pène F, Mayaux J, Faucher E, Nyunga  
24 M, Girault C, Perez P, Guitton C, Ekpe K, Kouatchet A, Théodose I, Benoit D,  
25 Canet E, Barbier F, Rabbat A, Bruneel F, Vincent F, Klouche K, Loay K, Mariotte  
26 E, Bouadma L, Moreau A-S, Seguin A, Meert A-P, Reignier J, Papazian L,  
27 Mehzari I, Cohen Y, Schenck M, Hamidfar R, Darmon M, Demoule A, Chevret S,  
28 Azoulay E, Groupe de Recherche en Réanimation Respiratoire du patient d'Onco-  
29 Hématologie (GRRR-OH). Effect of Noninvasive Ventilation vs Oxygen Therapy  
30 on Mortality Among Immunocompromised Patients With Acute Respiratory  
31 Failure: A Randomized Clinical Trial. *JAMA* 2015;314(16):1711–9.  
32  
33  
34  
35  
36  
37  
38  
39  
40  
41  
42  
43  
44  
45 7. Hilbert G, Gruson D, Vargas F, Valentino R, Gbikpi-Benissan G, Dupon M,  
46 Reiffers J, Cardinaud JP. Noninvasive ventilation in immunosuppressed patients  
47 with pulmonary infiltrates, fever, and acute respiratory failure. *N Engl J Med*  
48 2001;344(7):481–7.  
49  
50  
51  
52  
53  
54  
55 8. Antonelli M, Conti G, Bufi M, Costa MG, Lappa A, Rocco M, Gasparetto A, Meduri  
56 GU. Noninvasive ventilation for treatment of acute respiratory failure in patients  
57  
58  
59  
60

- 1  
2  
3 undergoing solid organ transplantation: a randomized trial. *JAMA*  
4  
5 2000;283(2):235–41.  
6  
7  
8  
9 9. Squadrone V, Massaia M, Bruno B, Marmont F, Falda M, Bagna C, Bertone S,  
10  
11 Filippini C, Slutsky AS, Vitolo U, Boccadoro M, Ranieri VM. Early CPAP prevents  
12  
13 evolution of acute lung injury in patients with hematologic malignancy. *Intensive*  
14  
15 *Care Med* 2010;36(10):1666–74.  
16  
17  
18  
19 10. Frat J-P, Ragot S, Girault C, Perbet S, Prat G, Boulain T, Demoule A, Ricard J-D,  
20  
21 Coudroy R, Robert R, Mercat A, Brochard L, Thille AW. Effect of non-invasive  
22  
23 oxygenation strategies in immunocompromised patients with severe acute  
24  
25 respiratory failure: a post-hoc analysis of a randomised trial. *Lancet Respir Med*  
26  
27 2016;4(8):646–52.  
28  
29  
30  
31 11. Coudroy R, Jamet A, Petua P, Robert R, Frat J-P, Thille AW. High-flow oxygen  
32  
33 therapy through a nasal cannula versus noninvasive ventilation versus in  
34  
35 immunocompromised patients with acute respiratory failure. *Ann Intensive Care*  
36  
37 2016;6(1):45.  
38  
39  
40  
41 12. Sklar MC, Mohammed A, Orchanian-Cheff A, Del Sorbo L, Mehta S, Munshi L.  
42  
43 The Impact of High-Flow Nasal Oxygen in the Immunocompromised Critically Ill:  
44  
45 A Systematic Review and Meta-Analysis. *Respiratory Care* 2018;63(12):1555–66.  
46  
47  
48  
49 13. Mokart D, Geay C, Chow-Chine L, Brun J-P, Faucher M, Blache J-L, Bisbal M,  
50  
51 Sannini A. High-flow oxygen therapy in cancer patients with acute respiratory  
52  
53 failure. *Intensive Care Medicine* 2015;41(11):2008–10.  
54  
55  
56  
57 14. Frat J-P, Thille AW, Mercat A, Girault C, Ragot S, Perbet S, Prat G, Boulain T,  
58  
59 Morawiec E, Cottureau A, Devaquet J, Nseir S, Razazi K, Mira J-P, Argaud L,  
60

- 1  
2  
3 Chakarian J-C, Ricard J-D, Wittebole X, Chevalier S, Herbland A, Fartoukh M,  
4  
5 Constantin J-M, Tonnelier J-M, Pierrot M, Mathonnet A, Béduneau G, Delétage-  
6  
7 Métreau C, Richard J-CM, Brochard L, Robert R, FLORALI Study Group, REVA  
8  
9 Network. High-flow oxygen through nasal cannula in acute hypoxemic respiratory  
10  
11 failure. *N Engl J Med* 2015;372(23):2185–96.  
12  
13  
14  
15  
16 15. Carteaux G, Millán-Guilarte T, De Prost N, Razazi K, Abid S, Thille AW, Schortgen  
17  
18 F, Brochard L, Brun-Buisson C, Mekontso Dessap A. Failure of Noninvasive  
19  
20 Ventilation for De Novo Acute Hypoxemic Respiratory Failure: Role of Tidal  
21  
22 Volume. *Crit Care Med* 2016;44(2):282–90.  
23  
24  
25  
26 16. Frat J-P, Ragot S, Coudroy R, Constantin J-M, Girault C, Prat G, Boulain T,  
27  
28 Demoule A, Ricard J-D, Razazi K, Lascarrou J-B, Devaquet J, Mira J-P, Argaud  
29  
30 L, Chakarian J-C, Fartoukh M, Nseir S, Mercat A, Brochard L, Robert R, Thille  
31  
32 AW, REVA network. Predictors of Intubation in Patients With Acute Hypoxemic  
33  
34 Respiratory Failure Treated With a Noninvasive Oxygenation Strategy. *Crit Care*  
35  
36 *Med* 2018;46(2):208–15.  
37  
38  
39  
40 17. Brochard L, Slutsky A, Pesenti A. Mechanical Ventilation to Minimize Progression  
41  
42 of Lung Injury in Acute Respiratory Failure. *Am J Respir Crit Care Med*  
43  
44 2017;195(4):438–42.  
45  
46  
47  
48 18. Briel M, Meade M, Mercat A, Brower RG, Talmor D, Walter SD, Slutsky AS,  
49  
50 Pullenayegum E, Zhou Q, Cook D, Brochard L, Richard JC, Lamontagne F,  
51  
52 Bhatnagar N, Stewart TE, Guyatt G. Higher vs lower positive end-expiratory  
53  
54 pressure in patients with acute lung injury and acute respiratory distress  
55  
56 syndrome: systematic review and meta-analysis. *Jama* 2010;303:865–73.  
57  
58  
59  
60

- 1  
2  
3 19. Morais CCA, Koyama Y, Yoshida T, Plens GM, Gomes S, Lima CAS, Ramos  
4 OPS, Pereira SM, Kawaguchi N, Yamamoto H, Uchiyama A, Borges JB, Vidal  
5 Melo MF, Tucci MR, Amato MBP, Kavanagh BP, Costa ELV, Fujino Y. High  
6 Positive End-Expiratory Pressure Renders Spontaneous Effort Noninjurious.  
7 American Journal of Respiratory and Critical Care Medicine 2018;197(10):1285–  
8 96.  
9
- 10  
11  
12  
13  
14  
15  
16  
17  
18 20. Sehgal IS, Dhooria S, Agarwal R. High-Flow Nasal Cannula Oxygen in  
19 Respiratory Failure. N Engl J Med 2015;373(14):1374.  
20
- 21  
22  
23 21. Nava S, Navalesi P, Conti G. Time of non-invasive ventilation. Intensive Care Med  
24 2006;32(3):361–70.  
25
- 26  
27  
28  
29 22. ARDS Definition Task Force, Ranieri VM, Rubenfeld GD, Thompson BT,  
30 Ferguson ND, Caldwell E, Fan E, Camporota L, Slutsky AS. Acute respiratory  
31 distress syndrome: the Berlin Definition. JAMA 2012;307(23):2526–33.  
32
- 33  
34  
35  
36  
37 23. Rubin LG, Levin MJ, Ljungman P, Davies EG, Avery R, Tomblyn M, Bousvaros A,  
38 Dhanireddy S, Sung L, Keyserling H, Kang I. 2013 IDSA Clinical Practice  
39 Guideline for Vaccination of the Immunocompromised Host. Clinical Infectious  
40 Diseases 2014;58(3):e44–100.  
41
- 42  
43  
44  
45  
46  
47 24. Conference de Consensus Commune 2006 VNI.pdf [Internet]. [cited 2018 Oct  
48 11]; Available from: [https://www.srlf.org/wp-](https://www.srlf.org/wp-content/uploads/2015/12/2006_10_12_conference_de_consensus_commune_ventilation_non_invasive_resume.pdf)  
49 content/uploads/2015/12/2006\_10\_12\_conference\_de\_consensus\_commune\_ventilation\_non\_invasive\_resume.pdf  
50  
51  
52  
53  
54  
55
- 56  
57  
58 25. Coudroy R, Hoppe MA, Robert R, Frat J-P, Thille AW. Influence of the noninvasive  
59 ventilation protocol on intubations rates in patients with de novo acute respiratory  
60

- 1  
2  
3 failure: a systematic review of randomized trials. *Ann Intensive Care* 2019;9(Suppl  
4 1):P-55.  
5  
6  
7  
8  
9 26. Esteban A, Frutos-Vivar F, Ferguson ND, Arabi Y, Apezteguía C, González M,  
10 Epstein SK, Hill NS, Nava S, Soares M-A, D'Empaire G, Alía I, Anzueto A.  
11 Noninvasive positive-pressure ventilation for respiratory failure after extubation. *N*  
12 *Engl J Med* 2004;350(24):2452–60.  
13  
14  
15  
16  
17  
18  
19 27. Carrillo A, Gonzalez-Diaz G, Ferrer M, Martinez-Quintana ME, Lopez-Martinez A,  
20 Llamas N, Alcazar M, Torres A. Non-invasive ventilation in community-acquired  
21 pneumonia and severe acute respiratory failure. *Intensive Care Medicine*  
22 2012;38(3):458–66.  
23  
24  
25  
26  
27  
28  
29 28. Kang BJ, Koh Y, Lim C-M, Huh JW, Baek S, Han M, Seo H-S, Suh HJ, Seo GJ,  
30 Kim EY, Hong S-B. Failure of high-flow nasal cannula therapy may delay  
31 intubation and increase mortality. *Intensive Care Med* 2015;41(4):623–32.  
32  
33  
34  
35  
36  
37 29. Azoulay E, Lemiale V, Mokart D, Nseir S, Argaud L, Pène F, Kontar L, Bruneel F,  
38 Klouche K, Barbier F, Reignier J, Berrahil-Meksen L, Louis G, Constantin J-M,  
39 Mayaux J, Wallet F, Kouatchet A, Peigne V, Théodose I, Perez P, Girault C, Jaber  
40 S, Oziel J, Nyunga M, Terzi N, Bouadma L, Lebert C, Lautrette A, Bigé N,  
41 Raphalen J-H, Papazian L, Darmon M, Chevret S, Demoule A. Effect of High-  
42 Flow Nasal Oxygen vs Standard Oxygen on 28-Day Mortality in  
43 Immunocompromised Patients With Acute Respiratory Failure: The HIGH  
44 Randomized Clinical Trial. *JAMA* 2018;320(20):2099.  
45  
46  
47  
48  
49  
50  
51  
52  
53  
54  
55  
56  
57  
58  
59  
60

- 1  
2  
3 30. Oken MM, Creech RH, Tormey DC, Horton J, Davis TE, McFadden ET, Carbone  
4 PP. Toxicity and response criteria of the Eastern Cooperative Oncology Group.  
5  
6 Am J Clin Oncol 1982;5(6):649–55.  
7  
8  
9  
10  
11 31. Contejean A, Lemiale V, Resche-Rigon M, Mokart D, Pène F, Kouatchet A,  
12 Mayaux J, Vincent F, Nyunga M, Bruneel F, Rabbat A, Perez P, Meert A-P, Benoit  
13 D, Hamidfar R, Darmon M, Jourdain M, Renault A, Schlemmer B, Azoulay E.  
14 Increased mortality in hematological malignancy patients with acute respiratory  
15 failure from undetermined etiology: a Groupe de Recherche en Réanimation  
16 Respiratoire en Onco-Hématologique (Grrr-OH) study. Ann Intensive Care  
17 2016;6(1):102.  
18  
19  
20  
21  
22  
23  
24  
25  
26  
27  
28 32. Azoulay É, Mokart D, Lambert J, Lemiale V, Rabbat A, Kouatchet A, Vincent F,  
29 Gruson D, Bruneel F, Epinette-Branche G, Lafabrie A, Hamidfar-Roy R, Cracco  
30 C, Renard B, Tonnelier J-M, Blot F, Chevret S, Schlemmer B. Diagnostic Strategy  
31 for Hematology and Oncology Patients with Acute Respiratory Failure:  
32 Randomized Controlled Trial. American Journal of Respiratory and Critical Care  
33 Medicine 2010;182(8):1038–46.  
34  
35  
36  
37  
38  
39  
40  
41  
42  
43 33. Patel BK, Wolfe KS, Pohlman AS, Hall JB, Kress JP. Effect of Noninvasive  
44 Ventilation Delivered by Helmet vs Face Mask on the Rate of Endotracheal  
45 Intubation in Patients With Acute Respiratory Distress Syndrome: A Randomized  
46 Clinical Trial. JAMA 2016;315(22):2435–41.  
47  
48  
49  
50  
51  
52  
53 34. for the OUTCOMEREA study group, Terzi N, Darmon M, Reignier J, Ruckly S,  
54 Garrouste-Orgeas M, Lautrette A, Azoulay E, Mourvillier B, Argaud L, Papazian  
55 L, Gainnier M, Goldgran-Toledano D, Jamali S, Dumenil A-S, Schwebel C, Timsit  
56 J-F. Initial nutritional management during noninvasive ventilation and outcomes:  
57  
58  
59  
60



1  
2  
3 a retrospective cohort study. *Critical Care* [Internet] 2017 [cited 2019 Apr 4];21(1).  
4 Available from: [https://ccforum.biomedcentral.com/articles/10.1186/s13054-017-](https://ccforum.biomedcentral.com/articles/10.1186/s13054-017-1867-y)  
5  
6  
7  
8  
9  
10  
11  
12  
13  
14  
15  
16  
17  
18  
19  
20  
21  
22  
23  
24  
25  
26  
27  
28  
29  
30  
31  
32  
33  
34  
35  
36  
37  
38  
39  
40  
41  
42  
43  
44  
45  
46  
47  
48  
49  
50  
51  
52  
53  
54  
55  
56  
57  
58  
59  
60

35. Bellani G, Laffey JG, Pham T, Madotto F, Fan E, Brochard L, Esteban A, Gattinoni L, Bumbasirevic V, Piquilloud L, van Haren F, Larsson A, McAuley DF, Bauer PR, Arabi YM, Ranieri M, Antonelli M, Rubenfeld GD, Thompson BT, Wrigge H, Slutsky AS, Pesenti A, LUNG SAFE Investigators, ESICM Trials Group. Noninvasive Ventilation of Patients with Acute Respiratory Distress Syndrome. Insights from the LUNG SAFE Study. *Am J Respir Crit Care Med* 2017;195(1):67–77.
36. Slutsky AS, Ranieri VM. Ventilator-induced lung injury. *The New England journal of medicine* 2013;369:2126–36.

**Table 1. Characteristics and outcomes of previous trials comparing noninvasive ventilation to oxygen therapy in immunocompromised patients.** Outcomes of patients in the control arm are displayed in italics.

| <b>Authors</b>                 | <b>Year</b> | <b>Setting</b>   | <b>N=</b>             | <b>Arms</b>                         | <b>Intubation rate</b>   | <b>In-ICU mortality rate</b>               |
|--------------------------------|-------------|------------------|-----------------------|-------------------------------------|--------------------------|--------------------------------------------|
| <i>Antonelli et al.</i>        | 2000        | ICU, monocentre  | <i>20</i><br>20       | <i>O<sub>2</sub></i><br>NIV         | <i>70%</i><br>20%        | <i>50%</i><br>20%                          |
| <i>Hilbert et al.</i>          | 2001        | ICU, monocentre  | <i>26</i><br>26       | <i>O<sub>2</sub></i><br>NIV         | <i>77%</i><br>46%        | <i>69%</i><br>38%                          |
| <i>Lemiale et al.</i>          | 2015        | ICU, multicentre | <i>183</i><br>191     | <i>O<sub>2</sub></i><br>NIV         | <i>45%</i><br>38%        | <i>25%</i><br>21%                          |
| <i>Squadrone et al.</i>        | 2010        | Ward, monocentre | <i>20</i><br>20       | <i>O<sub>2</sub></i><br>CPAP        | <i>40%</i><br>10%        | <i>75%<sup>1</sup></i><br>15% <sup>1</sup> |
| <i>Frat et al.<sup>2</sup></i> | 2015        | ICU, multicentre | <i>30</i><br>26<br>26 | <i>O<sub>2</sub></i><br>NIV<br>HFOT | <i>43%</i><br>65%<br>31% | <i>20%</i><br>42%<br>15%                   |

<sup>1</sup> Hospital mortality (ICU mortality was not indicated in the article); <sup>2</sup> post-hoc analysis of a randomised trial.

CPAP: continuous positive airway pressure; HFOT: high-flow nasal cannula oxygen therapy; O<sub>2</sub>: oxygen therapy; NIV: noninvasive ventilation

## FIGURE LEGENDS

**Figure 1:** Flow chart of the patients and study design.

**Figure 2:** Flow chart of timing in collection of different variables.

For peer review only

**Abbreviations:**

FiO<sub>2</sub>: Fraction of inspired oxygen

HFOT: High flow nasal cannula oxygen therapy

ICU: Intensive care unit

NIV: Noninvasive ventilation

PaO<sub>2</sub>: Partial pressure of arterial oxygen

PaCO<sub>2</sub>: Partial pressure of arterial carbon dioxide

SpO<sub>2</sub>: Peripheral capillary oxygen saturation

For peer review only

## Author Contributions

Remi Coudroy, Jean-Pierre Frat and Arnaud W Thille, in collaboration with Stephan Ehrmann, Frédéric Pène, Nicolas Terzi, Maxens Decavèle, Gwenaël Prat, Charlotte Garret, Damien Contou, Jeremy Bourenne ,Arnaud Gacouin, Christophe Girault, Jean Dellamonica, Dominique Malacrino, Guylaine Labro, Jean-Pierre Quenot, Alexandre Herbland, Sébastien Jochmans, Jérôme Devaquet, Dalila Benzekri, Emmanuel Vivier, Saad Nseir, Gwenhaël Colin, Didier Thevenin, Giacomo Grasselli, Mona Assefi, Claude Guérin, David Bougon, Thierry Lherm, Achille Kouatchet, Stéphanie Ragot and the REVA Network designed the study and wrote the manuscript together. Stephanie Ragot provided substantial contributions to the conception and design of the study, and wrote the statistical analysis plan and estimated the sample size with Remi Coudroy.

Remi Coudroy, Jean-Pierre Frat, Stephan Ehrmann, Frédéric Pène, Nicolas Terzi, Maxens Decavèle, Gwenaël Prat, Charlotte Garret, Damien Contou, Jeremy Bourenne ,Arnaud Gacouin, Christophe Girault, Jean Dellamonica, Dominique Malacrino, Guylaine Labro, Jean-Pierre Quenot, Alexandre Herbland, Sébastien Jochmans, Jérôme Devaquet, Dalila Benzekri, Emmanuel Vivier, Saad Nseir, Gwenhaël Colin, Didier Thevenin, Giacomo Grasselli, Mona Assefi, Claude Guérin, David Bougon, Thierry Lherm, Achille Kouatchet, Stéphanie Ragot, and Arnaud W Thille contributed in drafting the work, revising it critically for important intellectual content and approved the final version of the manuscript. Remi Coudroy, Jean-Pierre Frat, Stephan Ehrmann, Frédéric Pène, Nicolas Terzi, Maxens Decavèle, Gwenaël Prat, Charlotte Garret, Damien Contou, Jeremy Bourenne ,Arnaud Gacouin, Christophe Girault, Jean Dellamonica, Dominique Malacrino, Guylaine Labro, Jean-Pierre Quenot, Alexandre Herbland, Sébastien Jochmans, Jérôme Devaquet, Dalila Benzekri, Emmanuel Vivier, Saad Nseir, Gwenhaël Colin, Didier Thevenin, Giacomo Grasselli, Mona Assefi, Claude Guérin, David Bougon, Thierry Lherm, Achille Kouatchet, Stéphanie Ragot, and Arnaud W Thille give their agreement to be accountable for all aspects of the work, and ensure the accuracy and integrity of any part of the work.

## Funding

1  
2  
3 The study was funded by the 'Programme Hospitalier de Recherche Clinique Inter-  
4 régional 2015' of the French Ministry of Health. The study promoter is the University  
5 Hospital of Poitiers, Poitiers, France.  
6  
7

8 The study promoter received financial grants from SOS Oxygène and ADAIRC.  
9  
10

### 11 **Disclaimer**

12 The firm Fisher & Paykel provides the high-flow oxygen therapy equipment and the  
13 noninvasive masks to all the participating centres but has no other involvement in the  
14 study.  
15  
16  
17  
18  
19

### 20 **Competing interests**

21 RC reports travel expense coverage to attend scientific meetings from Fisher & Paykel  
22 and MSD.  
23

24 JPF reports travel expense coverage to attend scientific meetings and personal fees  
25 from Fisher & Paykel and SOS Oxygène.  
26  
27

28 SE reports consulting fees from Aerogen, La diffusion technique française, Baxter,  
29 Bayer, lecture fees from Aerogen, Fisher & Paykel, unrestricted research grants /  
30 research support from from Fisher & Paykel, Hamilton medical, Aerogen, La diffusion  
31 technique française.  
32  
33

34 Chr G reports travel expense coverage to attend scientific meetings, personal fees and  
35 logistic support from Fisher & Paykel, Resmed and Lowenstein Medical.  
36  
37

38 AWT reports travel expense coverage to attend scientific meetings and payment for  
39 lectures from Fisher & Paykel, Covidien, Maquet-Getinge, General Electric Healthcare.  
40  
41

42 SJ reports personal fees for lectures from Hamilton Medical and Nihon Kohden.  
43

44 GG reports payment for lectures from Getinge, Draeger Medical, Pfizer,  
45 Fisher&Paykel, and travel/accommodation/congress registration support from Biotest  
46 and Getinge.  
47  
48

49 FP, NT, MD, GP, Cha G, DC, JB, AG, JD, DM, GL, JPQ, AH, JD, DB, EV, SN, GC, DT,  
50 MA, CI G, DB, TL, AK, SR and report no conflict of interest.  
51  
52  
53

### 54 **Ethics approval**

55 The study has been approved by the central ethics committee (Ethics Committee  
56 Ouest III, Poitiers, France) with the registration number 2016-A00834-47 (23 March  
57 2016).  
58  
59  
60

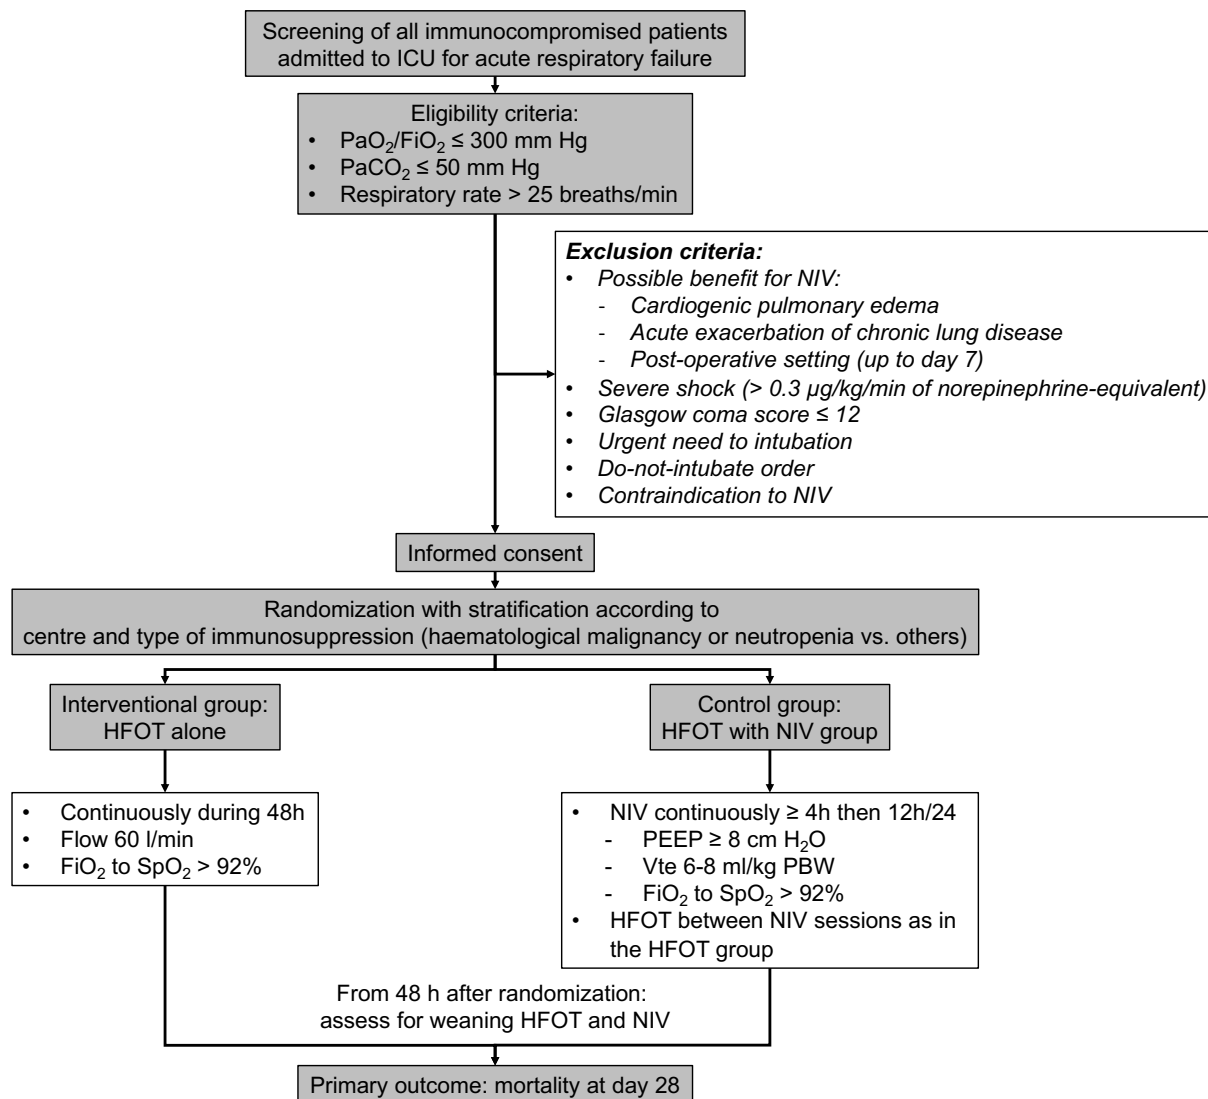

HFOT: high flow nasal cannula oxygen therapy; ICU: intensive care unit; NIV: noninvasive ventilation; PBW: predicted body weight; PEEP: positive end-expiratory pressure; Vte: expired tidal volume

| <b>Actions</b>                                                      | <b>Inclusion<br/>=H0</b> | <b>H1</b> | <b>H6-H12</b> | <b>H24 ± 6</b> | <b>H48 ± 6</b> | <b>H72 ± 6</b> | <b>Intubation</b> | <b>ICU and<br/>hospital<br/>discharge</b> | <b>D28</b> | <b>D90</b> | <b>D180</b> |
|---------------------------------------------------------------------|--------------------------|-----------|---------------|----------------|----------------|----------------|-------------------|-------------------------------------------|------------|------------|-------------|
| <b>Informed consent</b>                                             | X                        |           |               |                |                |                |                   |                                           |            |            |             |
| <b>Inclusion /exclusion criteria</b>                                | X                        |           |               |                |                |                |                   |                                           |            |            |             |
| <b>Randomization and stratification</b> (type of immunosuppression) | X                        |           |               |                |                |                |                   |                                           |            |            |             |
| <b>Clinical characteristics</b>                                     |                          |           |               |                |                |                |                   |                                           |            |            |             |
| Height, weight, body temperature                                    | X                        |           |               |                |                |                |                   |                                           |            |            |             |
| Vital signs                                                         | X                        | X         | X             | X              | X              | X              | X                 |                                           |            |            |             |
| Tolerance (dyspnea and comfort evaluation)                          | X                        | X         | X             | X              | X              | X              | X                 |                                           |            |            |             |
| HFOT or NIV settings                                                | X                        | X         | X             | X              | X              | X              |                   |                                           |            |            |             |
| <b>Supplementary analysis</b>                                       |                          |           |               |                |                |                |                   |                                           |            |            |             |
| Arterial blood gases                                                | X                        | X         | X             | X              | X              | X              | X                 |                                           |            |            |             |
| Chest X-ray                                                         | X                        |           |               |                |                |                | X                 |                                           |            |            |             |
| SOFA score                                                          | X                        |           | X             | X              | X              | X              | X                 |                                           |            |            |             |
| Daily duration of HFOT and NIV                                      |                          |           |               | X              | X              | X              |                   |                                           |            |            |             |
| <b>Status</b> (alive/dead) and cause of death                       |                          |           |               |                |                |                |                   | X                                         |            | X          |             |



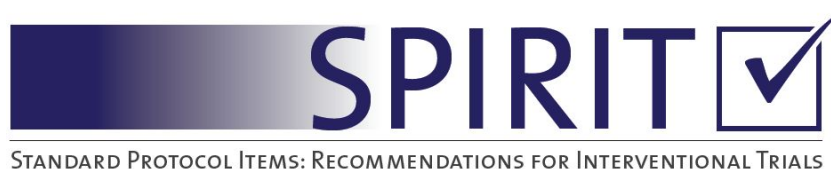

STANDARD PROTOCOL ITEMS: RECOMMENDATIONS FOR INTERVENTIONAL TRIALS

SPIRIT 2013 Checklist: Recommended items to address in a clinical trial protocol and related documents\*

| Page                              | Section/item               | Item No | Description                                                                                                                                                                                                                                                                              |
|-----------------------------------|----------------------------|---------|------------------------------------------------------------------------------------------------------------------------------------------------------------------------------------------------------------------------------------------------------------------------------------------|
| <b>Administrative information</b> |                            |         |                                                                                                                                                                                                                                                                                          |
| 1                                 | Title                      | 1       | Descriptive title identifying the study design, population, interventions, and, if applicable, trial acronym                                                                                                                                                                             |
| 3                                 | Trial registration         | 2a      | Trial identifier and registry name. If not yet registered, name of intended registry                                                                                                                                                                                                     |
| 3                                 |                            | 2b      | All items from the World Health Organization Trial Registration Data Set                                                                                                                                                                                                                 |
| 5                                 | Protocol version           | 3       | Date and version identifier                                                                                                                                                                                                                                                              |
| 26                                | Funding                    | 4       | Sources and types of financial, material, and other support                                                                                                                                                                                                                              |
| 1-4                               | Roles and responsibilities | 5a      | Names, affiliations, and roles of protocol contributors                                                                                                                                                                                                                                  |
| 4                                 |                            | 5b      | Name and contact information for the trial sponsor                                                                                                                                                                                                                                       |
| 4                                 |                            | 5c      | Role of study sponsor and funders, if any, in study design; collection, management, analysis, and interpretation of data; writing of the report; and the decision to submit the report for publication, including whether they will have ultimate authority over any of these activities |
| NA                                |                            | 5d      | Composition, roles, and responsibilities of the coordinating centre, steering committee, endpoint adjudication committee, data management team, and other individuals or groups overseeing the trial, if applicable (see Item 21a for data monitoring committee)                         |
| <b>Introduction</b>               |                            |         |                                                                                                                                                                                                                                                                                          |
| 8                                 | Background and rationale   | 6a      | Description of research question and justification for undertaking the trial, including summary of relevant studies (published and unpublished) examining benefits and harms for each intervention                                                                                       |
| 8                                 |                            | 6b      | Explanation for choice of comparators                                                                                                                                                                                                                                                    |
| 9                                 | Objectives                 | 7       | Specific objectives or hypotheses                                                                                                                                                                                                                                                        |
| 9                                 | Trial design               | 8       | Description of trial design including type of trial (eg, parallel group, crossover, factorial, single group), allocation ratio, and framework (eg, superiority, equivalence, noninferiority, exploratory)                                                                                |

**Methods: Participants, interventions, and outcomes**

|    |       |                      |     |                                                                                                                                                                                                                                                                                                                                                                                |
|----|-------|----------------------|-----|--------------------------------------------------------------------------------------------------------------------------------------------------------------------------------------------------------------------------------------------------------------------------------------------------------------------------------------------------------------------------------|
| 1  |       |                      |     |                                                                                                                                                                                                                                                                                                                                                                                |
| 2  |       |                      |     |                                                                                                                                                                                                                                                                                                                                                                                |
| 3  |       |                      |     |                                                                                                                                                                                                                                                                                                                                                                                |
| 4  | 9     | Study setting        | 9   | Description of study settings (eg, community clinic, academic hospital) and list of countries where data will be collected. Reference to where list of study sites can be obtained                                                                                                                                                                                             |
| 5  |       |                      |     |                                                                                                                                                                                                                                                                                                                                                                                |
| 6  |       |                      |     |                                                                                                                                                                                                                                                                                                                                                                                |
| 7  |       |                      |     |                                                                                                                                                                                                                                                                                                                                                                                |
| 8  | 9-10  | Eligibility criteria | 10  | Inclusion and exclusion criteria for participants. If applicable, eligibility criteria for study centres and individuals who will perform the interventions (eg, surgeons, psychotherapists)                                                                                                                                                                                   |
| 9  |       |                      |     |                                                                                                                                                                                                                                                                                                                                                                                |
| 10 |       |                      |     |                                                                                                                                                                                                                                                                                                                                                                                |
| 11 |       |                      |     |                                                                                                                                                                                                                                                                                                                                                                                |
| 12 |       |                      |     |                                                                                                                                                                                                                                                                                                                                                                                |
| 13 | 10    | Interventions        | 11a | Interventions for each group with sufficient detail to allow replication, including how and when they will be administered                                                                                                                                                                                                                                                     |
| 14 |       |                      |     |                                                                                                                                                                                                                                                                                                                                                                                |
| 15 |       |                      |     |                                                                                                                                                                                                                                                                                                                                                                                |
| 16 | 11-12 |                      | 11b | Criteria for discontinuing or modifying allocated interventions for a given trial participant (eg, drug dose change in response to harms, participant request, or improving/worsening disease)                                                                                                                                                                                 |
| 17 |       |                      |     |                                                                                                                                                                                                                                                                                                                                                                                |
| 18 |       |                      |     |                                                                                                                                                                                                                                                                                                                                                                                |
| 19 |       |                      |     |                                                                                                                                                                                                                                                                                                                                                                                |
| 20 | NA    |                      | 11c | Strategies to improve adherence to intervention protocols, and any procedures for monitoring adherence (eg, drug tablet return, laboratory tests)                                                                                                                                                                                                                              |
| 21 |       |                      |     |                                                                                                                                                                                                                                                                                                                                                                                |
| 22 |       |                      |     |                                                                                                                                                                                                                                                                                                                                                                                |
| 23 |       |                      |     |                                                                                                                                                                                                                                                                                                                                                                                |
| 24 |       |                      |     |                                                                                                                                                                                                                                                                                                                                                                                |
| 25 | 12    |                      | 11d | Relevant concomitant care and interventions that are permitted or prohibited during the trial                                                                                                                                                                                                                                                                                  |
| 26 |       |                      |     |                                                                                                                                                                                                                                                                                                                                                                                |
| 27 |       |                      |     |                                                                                                                                                                                                                                                                                                                                                                                |
| 28 | 12    | Outcomes             | 12  | Primary, secondary, and other outcomes, including the specific measurement variable (eg, systolic blood pressure), analysis metric (eg, change from baseline, final value, time to event), method of aggregation (eg, median, proportion), and time point for each outcome. Explanation of the clinical relevance of chosen efficacy and harm outcomes is strongly recommended |
| 29 |       |                      |     |                                                                                                                                                                                                                                                                                                                                                                                |
| 30 |       |                      |     |                                                                                                                                                                                                                                                                                                                                                                                |
| 31 |       |                      |     |                                                                                                                                                                                                                                                                                                                                                                                |
| 32 |       |                      |     |                                                                                                                                                                                                                                                                                                                                                                                |
| 33 |       |                      |     |                                                                                                                                                                                                                                                                                                                                                                                |
| 34 |       |                      |     |                                                                                                                                                                                                                                                                                                                                                                                |
| 35 |       |                      |     |                                                                                                                                                                                                                                                                                                                                                                                |
| 36 | 13    | Participant timeline | 13  | Time schedule of enrolment, interventions (including any run-ins and washouts), assessments, and visits for participants. A schematic diagram is highly recommended (see Figure)                                                                                                                                                                                               |
| 37 |       |                      |     |                                                                                                                                                                                                                                                                                                                                                                                |
| 38 |       |                      |     |                                                                                                                                                                                                                                                                                                                                                                                |
| 39 |       |                      |     |                                                                                                                                                                                                                                                                                                                                                                                |
| 40 |       |                      |     |                                                                                                                                                                                                                                                                                                                                                                                |
| 41 | 12-13 | Sample size          | 14  | Estimated number of participants needed to achieve study objectives and how it was determined, including clinical and statistical assumptions supporting any sample size calculations                                                                                                                                                                                          |
| 42 |       |                      |     |                                                                                                                                                                                                                                                                                                                                                                                |
| 43 |       |                      |     |                                                                                                                                                                                                                                                                                                                                                                                |
| 44 |       |                      |     |                                                                                                                                                                                                                                                                                                                                                                                |
| 45 | 13    | Recruitment          | 15  | Strategies for achieving adequate participant enrolment to reach target sample size                                                                                                                                                                                                                                                                                            |
| 46 |       |                      |     |                                                                                                                                                                                                                                                                                                                                                                                |
| 47 |       |                      |     |                                                                                                                                                                                                                                                                                                                                                                                |

**Methods: Assignment of interventions (for controlled trials)**

Allocation:

|    |    |                     |     |                                                                                                                                                                                                                                                                                                                                                          |
|----|----|---------------------|-----|----------------------------------------------------------------------------------------------------------------------------------------------------------------------------------------------------------------------------------------------------------------------------------------------------------------------------------------------------------|
| 51 |    |                     |     |                                                                                                                                                                                                                                                                                                                                                          |
| 52 |    |                     |     |                                                                                                                                                                                                                                                                                                                                                          |
| 53 | 14 | Sequence generation | 16a | Method of generating the allocation sequence (eg, computer-generated random numbers), and list of any factors for stratification. To reduce predictability of a random sequence, details of any planned restriction (eg, blocking) should be provided in a separate document that is unavailable to those who enrol participants or assign interventions |
| 54 |    |                     |     |                                                                                                                                                                                                                                                                                                                                                          |
| 55 |    |                     |     |                                                                                                                                                                                                                                                                                                                                                          |
| 56 |    |                     |     |                                                                                                                                                                                                                                                                                                                                                          |
| 57 |    |                     |     |                                                                                                                                                                                                                                                                                                                                                          |
| 58 |    |                     |     |                                                                                                                                                                                                                                                                                                                                                          |
| 59 |    |                     |     |                                                                                                                                                                                                                                                                                                                                                          |
| 60 |    |                     |     |                                                                                                                                                                                                                                                                                                                                                          |

|    |    |                                  |     |                                                                                                                                                                                                           |
|----|----|----------------------------------|-----|-----------------------------------------------------------------------------------------------------------------------------------------------------------------------------------------------------------|
| 1  |    |                                  |     |                                                                                                                                                                                                           |
| 2  | 14 | Allocation concealment mechanism | 16b | Mechanism of implementing the allocation sequence (eg, central telephone; sequentially numbered, opaque, sealed envelopes), describing any steps to conceal the sequence until interventions are assigned |
| 3  |    |                                  |     |                                                                                                                                                                                                           |
| 4  |    |                                  |     |                                                                                                                                                                                                           |
| 5  |    |                                  |     |                                                                                                                                                                                                           |
| 6  |    |                                  |     |                                                                                                                                                                                                           |
| 7  | 14 | Implementation                   | 16c | Who will generate the allocation sequence, who will enrol participants, and who will assign participants to interventions                                                                                 |
| 8  |    |                                  |     |                                                                                                                                                                                                           |
| 9  |    |                                  |     |                                                                                                                                                                                                           |
| 10 | 7  | Blinding (masking)               | 17a | Who will be blinded after assignment to interventions (eg, trial participants, care providers, outcome assessors, data analysts), and how                                                                 |
| 11 |    |                                  |     |                                                                                                                                                                                                           |
| 12 |    |                                  |     |                                                                                                                                                                                                           |
| 13 |    |                                  |     |                                                                                                                                                                                                           |
| 14 |    |                                  |     |                                                                                                                                                                                                           |
| 15 | NA |                                  | 17b | If blinded, circumstances under which unblinding is permissible, and procedure for revealing a participant's allocated intervention during the trial                                                      |
| 16 |    |                                  |     |                                                                                                                                                                                                           |
| 17 |    |                                  |     |                                                                                                                                                                                                           |
| 18 |    |                                  |     |                                                                                                                                                                                                           |
| 19 |    |                                  |     |                                                                                                                                                                                                           |

### Methods: Data collection, management, and analysis

|    |       |                         |     |                                                                                                                                                                                                                                                                                                                                                                                                              |
|----|-------|-------------------------|-----|--------------------------------------------------------------------------------------------------------------------------------------------------------------------------------------------------------------------------------------------------------------------------------------------------------------------------------------------------------------------------------------------------------------|
| 20 |       |                         |     |                                                                                                                                                                                                                                                                                                                                                                                                              |
| 21 |       |                         |     |                                                                                                                                                                                                                                                                                                                                                                                                              |
| 22 | 14    | Data collection methods | 18a | Plans for assessment and collection of outcome, baseline, and other trial data, including any related processes to promote data quality (eg, duplicate measurements, training of assessors) and a description of study instruments (eg, questionnaires, laboratory tests) along with their reliability and validity, if known. Reference to where data collection forms can be found, if not in the protocol |
| 23 |       |                         |     |                                                                                                                                                                                                                                                                                                                                                                                                              |
| 24 |       |                         |     |                                                                                                                                                                                                                                                                                                                                                                                                              |
| 25 |       |                         |     |                                                                                                                                                                                                                                                                                                                                                                                                              |
| 26 |       |                         |     |                                                                                                                                                                                                                                                                                                                                                                                                              |
| 27 |       |                         |     |                                                                                                                                                                                                                                                                                                                                                                                                              |
| 28 |       |                         |     |                                                                                                                                                                                                                                                                                                                                                                                                              |
| 29 |       |                         |     |                                                                                                                                                                                                                                                                                                                                                                                                              |
| 30 | 14    |                         | 18b | Plans to promote participant retention and complete follow-up, including list of any outcome data to be collected for participants who discontinue or deviate from intervention protocols                                                                                                                                                                                                                    |
| 31 |       |                         |     |                                                                                                                                                                                                                                                                                                                                                                                                              |
| 32 |       |                         |     |                                                                                                                                                                                                                                                                                                                                                                                                              |
| 33 |       |                         |     |                                                                                                                                                                                                                                                                                                                                                                                                              |
| 34 | 16    | Data management         | 19  | Plans for data entry, coding, security, and storage, including any related processes to promote data quality (eg, double data entry; range checks for data values). Reference to where details of data management procedures can be found, if not in the protocol                                                                                                                                            |
| 35 |       |                         |     |                                                                                                                                                                                                                                                                                                                                                                                                              |
| 36 |       |                         |     |                                                                                                                                                                                                                                                                                                                                                                                                              |
| 37 |       |                         |     |                                                                                                                                                                                                                                                                                                                                                                                                              |
| 38 |       |                         |     |                                                                                                                                                                                                                                                                                                                                                                                                              |
| 39 |       |                         |     |                                                                                                                                                                                                                                                                                                                                                                                                              |
| 40 | 15-16 | Statistical methods     | 20a | Statistical methods for analysing primary and secondary outcomes. Reference to where other details of the statistical analysis plan can be found, if not in the protocol                                                                                                                                                                                                                                     |
| 41 |       |                         |     |                                                                                                                                                                                                                                                                                                                                                                                                              |
| 42 |       |                         |     |                                                                                                                                                                                                                                                                                                                                                                                                              |
| 43 |       |                         |     |                                                                                                                                                                                                                                                                                                                                                                                                              |
| 44 | 16    |                         | 20b | Methods for any additional analyses (eg, subgroup and adjusted analyses)                                                                                                                                                                                                                                                                                                                                     |
| 45 |       |                         |     |                                                                                                                                                                                                                                                                                                                                                                                                              |
| 46 |       |                         |     |                                                                                                                                                                                                                                                                                                                                                                                                              |
| 47 |       |                         |     |                                                                                                                                                                                                                                                                                                                                                                                                              |
| 48 | 15    |                         | 20c | Definition of analysis population relating to protocol non-adherence (eg, as randomised analysis), and any statistical methods to handle missing data (eg, multiple imputation)                                                                                                                                                                                                                              |
| 49 |       |                         |     |                                                                                                                                                                                                                                                                                                                                                                                                              |
| 50 |       |                         |     |                                                                                                                                                                                                                                                                                                                                                                                                              |
| 51 |       |                         |     |                                                                                                                                                                                                                                                                                                                                                                                                              |

### Methods: Monitoring

|    |    |                 |     |                                                                                                                                                                                                                                                                                                                                       |
|----|----|-----------------|-----|---------------------------------------------------------------------------------------------------------------------------------------------------------------------------------------------------------------------------------------------------------------------------------------------------------------------------------------|
| 52 |    |                 |     |                                                                                                                                                                                                                                                                                                                                       |
| 53 |    |                 |     |                                                                                                                                                                                                                                                                                                                                       |
| 54 | 16 | Data monitoring | 21a | Composition of data monitoring committee (DMC); summary of its role and reporting structure; statement of whether it is independent from the sponsor and competing interests; and reference to where further details about its charter can be found, if not in the protocol. Alternatively, an explanation of why a DMC is not needed |
| 55 |    |                 |     |                                                                                                                                                                                                                                                                                                                                       |
| 56 |    |                 |     |                                                                                                                                                                                                                                                                                                                                       |
| 57 |    |                 |     |                                                                                                                                                                                                                                                                                                                                       |
| 58 |    |                 |     |                                                                                                                                                                                                                                                                                                                                       |
| 59 |    |                 |     |                                                                                                                                                                                                                                                                                                                                       |
| 60 |    |                 |     |                                                                                                                                                                                                                                                                                                                                       |

|    |    |          |     |                                                                                                                                                                                   |
|----|----|----------|-----|-----------------------------------------------------------------------------------------------------------------------------------------------------------------------------------|
| 1  |    |          |     |                                                                                                                                                                                   |
| 2  | NA |          | 21b | Description of any interim analyses and stopping guidelines, including who will have access to these interim results and make the final decision to terminate the trial           |
| 3  |    |          |     |                                                                                                                                                                                   |
| 4  |    |          |     |                                                                                                                                                                                   |
| 5  |    |          |     |                                                                                                                                                                                   |
| 6  | 16 | Harms    | 22  | Plans for collecting, assessing, reporting, and managing solicited and spontaneously reported adverse events and other unintended effects of trial interventions or trial conduct |
| 7  |    |          |     |                                                                                                                                                                                   |
| 8  |    |          |     |                                                                                                                                                                                   |
| 9  |    |          |     |                                                                                                                                                                                   |
| 10 | 16 | Auditing | 23  | Frequency and procedures for auditing trial conduct, if any, and whether the process will be independent from investigators and the sponsor                                       |
| 11 |    |          |     |                                                                                                                                                                                   |
| 12 |    |          |     |                                                                                                                                                                                   |
| 13 |    |          |     |                                                                                                                                                                                   |
| 14 |    |          |     |                                                                                                                                                                                   |

### Ethics and dissemination

|    |    |                               |     |                                                                                                                                                                                                                                                                                     |
|----|----|-------------------------------|-----|-------------------------------------------------------------------------------------------------------------------------------------------------------------------------------------------------------------------------------------------------------------------------------------|
| 15 |    |                               |     |                                                                                                                                                                                                                                                                                     |
| 16 |    |                               |     |                                                                                                                                                                                                                                                                                     |
| 17 | 5  | Research ethics approval      | 24  | Plans for seeking research ethics committee/institutional review board (REC/IRB) approval                                                                                                                                                                                           |
| 18 |    |                               |     |                                                                                                                                                                                                                                                                                     |
| 19 |    |                               |     |                                                                                                                                                                                                                                                                                     |
| 20 | 17 | Protocol amendments           | 25  | Plans for communicating important protocol modifications (eg, changes to eligibility criteria, outcomes, analyses) to relevant parties (eg, investigators, REC/IRBs, trial participants, trial registries, journals, regulators)                                                    |
| 21 |    |                               |     |                                                                                                                                                                                                                                                                                     |
| 22 |    |                               |     |                                                                                                                                                                                                                                                                                     |
| 23 |    |                               |     |                                                                                                                                                                                                                                                                                     |
| 24 |    |                               |     |                                                                                                                                                                                                                                                                                     |
| 25 |    |                               |     |                                                                                                                                                                                                                                                                                     |
| 26 | 16 | Consent or assent             | 26a | Who will obtain informed consent or assent from potential trial participants or authorised surrogates, and how (see Item 32)                                                                                                                                                        |
| 27 |    |                               |     |                                                                                                                                                                                                                                                                                     |
| 28 |    |                               |     |                                                                                                                                                                                                                                                                                     |
| 29 | NA |                               | 26b | Additional consent provisions for collection and use of participant data and biological specimens in ancillary studies, if applicable                                                                                                                                               |
| 30 |    |                               |     |                                                                                                                                                                                                                                                                                     |
| 31 |    |                               |     |                                                                                                                                                                                                                                                                                     |
| 32 | 17 | Confidentiality               | 27  | How personal information about potential and enrolled participants will be collected, shared, and maintained in order to protect confidentiality before, during, and after the trial                                                                                                |
| 33 |    |                               |     |                                                                                                                                                                                                                                                                                     |
| 34 |    |                               |     |                                                                                                                                                                                                                                                                                     |
| 35 |    |                               |     |                                                                                                                                                                                                                                                                                     |
| 36 |    |                               |     |                                                                                                                                                                                                                                                                                     |
| 37 | 17 | Declaration of interests      | 28  | Financial and other competing interests for principal investigators for the overall trial and each study site                                                                                                                                                                       |
| 38 |    |                               |     |                                                                                                                                                                                                                                                                                     |
| 39 |    |                               |     |                                                                                                                                                                                                                                                                                     |
| 40 | 17 | Access to data                | 29  | Statement of who will have access to the final trial dataset, and disclosure of contractual agreements that limit such access for investigators                                                                                                                                     |
| 41 |    |                               |     |                                                                                                                                                                                                                                                                                     |
| 42 |    |                               |     |                                                                                                                                                                                                                                                                                     |
| 43 |    |                               |     |                                                                                                                                                                                                                                                                                     |
| 44 | NA | Ancillary and post-trial care | 30  | Provisions, if any, for ancillary and post-trial care, and for compensation to those who suffer harm from trial participation                                                                                                                                                       |
| 45 |    |                               |     |                                                                                                                                                                                                                                                                                     |
| 46 |    |                               |     |                                                                                                                                                                                                                                                                                     |
| 47 |    |                               |     |                                                                                                                                                                                                                                                                                     |
| 48 | 17 | Dissemination policy          | 31a | Plans for investigators and sponsor to communicate trial results to participants, healthcare professionals, the public, and other relevant groups (eg, via publication, reporting in results databases, or other data sharing arrangements), including any publication restrictions |
| 49 |    |                               |     |                                                                                                                                                                                                                                                                                     |
| 50 |    |                               |     |                                                                                                                                                                                                                                                                                     |
| 51 |    |                               |     |                                                                                                                                                                                                                                                                                     |
| 52 |    |                               |     |                                                                                                                                                                                                                                                                                     |
| 53 | 26 |                               | 31b | Authorship eligibility guidelines and any intended use of professional writers                                                                                                                                                                                                      |
| 54 |    |                               |     |                                                                                                                                                                                                                                                                                     |
| 55 |    |                               |     |                                                                                                                                                                                                                                                                                     |
| 56 |    |                               |     |                                                                                                                                                                                                                                                                                     |
| 57 | NA |                               | 31c | Plans, if any, for granting public access to the full protocol, participant-level dataset, and statistical code                                                                                                                                                                     |
| 58 |    |                               |     |                                                                                                                                                                                                                                                                                     |
| 59 |    |                               |     |                                                                                                                                                                                                                                                                                     |
| 60 |    |                               |     |                                                                                                                                                                                                                                                                                     |

## Appendices

|     |                            |    |                                                                                                                                                                                                |
|-----|----------------------------|----|------------------------------------------------------------------------------------------------------------------------------------------------------------------------------------------------|
| App | Informed consent materials | 32 | Model consent form and other related documentation given to participants and authorised surrogates                                                                                             |
| NA  | Biological specimens       | 33 | Plans for collection, laboratory evaluation, and storage of biological specimens for genetic or molecular analysis in the current trial and for future use in ancillary studies, if applicable |

\*It is strongly recommended that this checklist be read in conjunction with the SPIRIT 2013 Explanation & Elaboration for important clarification on the items. Amendments to the protocol should be tracked and dated. The SPIRIT checklist is copyrighted by the SPIRIT Group under the Creative Commons "[Attribution-NonCommercial-NoDerivs 3.0 Unported](#)" license.

For peer review only
